# Supplementary material
Source: MDPI journal article supplement (https://www.mdpi.com/2073-4395/13/1/32)
Supplement: s1 [file s1]

**Table S1.** Reports of mite species per group and family reported consuming nematodes.

| Mite group | Mite family | Mite species                                                                                                                                                                                                                | Nematode species (family) [group: FL = free-living, PP = Phyto-parasitic, AP = Parasitic of animals] <sup>i ii</sup> | Combined (M) or compared (C) with another prey regarding fitness [prey species] | Fecundity/ fitness factor/nematode population reduction                                                                                                                                                         | Laboratory experiment (Lab) <sup>iii</sup> / Field / Greenhouse | Ref.  |
|------------|-------------|-----------------------------------------------------------------------------------------------------------------------------------------------------------------------------------------------------------------------------|----------------------------------------------------------------------------------------------------------------------|---------------------------------------------------------------------------------|-----------------------------------------------------------------------------------------------------------------------------------------------------------------------------------------------------------------|-----------------------------------------------------------------|-------|
| All groups | Mixed       | Microarthropods, including unidentified species of Bdellidae, Pyemotidae, Raphignathidae, Tarsonemidae and Tydeidae (Trombidiformes: Prostigmata); Ascidae, Arctacaridae, Laelapidae, Rhodacaridae (Mesostigmata: Gamasina) | Unidentified nematodes [possibly FL, PP]                                                                             | -                                                                               | Large numbers of free-living nematodes in the bags where microarthropods were excluded with chlordane                                                                                                           | Field: Observation of litter decomposition in mesh bags         | [229] |
|            | Mixed       | Microarthropods, including unidentified species of Pyemotidae, and Tydeidae (Trombidiformes: Prostigmata); Mesostigmata                                                                                                     | Unidentified nematodes, including <i>Aphelenchus</i> sp. (Aphelenchidae) and Cephalobidae [possibly FL]              | -                                                                               | Large numbers of free-living nematodes in the bags where Tydeidae were excluded with chlordane<br>Increasing number of Mesostigmata mites surrounding bags coincides with increase of nematodes inside the bags | Field: Observation of litter decomposition in mesh bags         | [230] |
|            | Mixed       | Unidentified species of different families (Trombidiformes: Prostigmata, Sarcoptiformes: Oribatida, Mesostigmata), especially Rhodacaridae and Laelapidae                                                                   | Unidentified nematodes [FL]                                                                                          | -                                                                               | Increment of nematodes abundance when Rhodacaridae and Laelapidae mites were excluded in chlordane treatment                                                                                                    | Field: Observations                                             | [231] |

|  |       |                                                                                                                                                                                                                                                                                                  |                                                                        |   |                                                                                                                             |                                                          |       |
|--|-------|--------------------------------------------------------------------------------------------------------------------------------------------------------------------------------------------------------------------------------------------------------------------------------------------------|------------------------------------------------------------------------|---|-----------------------------------------------------------------------------------------------------------------------------|----------------------------------------------------------|-------|
|  | Mixed | Microarthropods, including unidentified species of Acaridae and Histiomatidae (=Anoetidae) (Sarcoptiformes: Oribatida: Astigmatina), Bdellidae, Cunaxidae, Pyemotidae, Tarsonemidae and Tydeidae (Trombidiformes: Prostigmata), Nanorchestidae (Sarcoptiformes: Endeostigmata), and Mesostigmata | Unidentified bacteriophagous, fungivorous and predatory nematodes [FL] | - | Removal of microarthropods, including mites, with chlordane resulted in an increase in the number of nematodes on the roots | Field: Observations of litter decomposition in mesh bags | [232] |
|--|-------|--------------------------------------------------------------------------------------------------------------------------------------------------------------------------------------------------------------------------------------------------------------------------------------------------|------------------------------------------------------------------------|---|-----------------------------------------------------------------------------------------------------------------------------|----------------------------------------------------------|-------|

|  |       |                                                                                                                                                                                                                                                                                                                                                                                                                                                                                                                                                                                                                                                                                                                                                                                                                                                                                                                                                                                                                                                                                                                                                                                    |                                                                                                                                                                                                                                                                                                                                                                                                                                                                                                                                                                                                                                                                                                                                              |   |                               |                                              |       |
|--|-------|------------------------------------------------------------------------------------------------------------------------------------------------------------------------------------------------------------------------------------------------------------------------------------------------------------------------------------------------------------------------------------------------------------------------------------------------------------------------------------------------------------------------------------------------------------------------------------------------------------------------------------------------------------------------------------------------------------------------------------------------------------------------------------------------------------------------------------------------------------------------------------------------------------------------------------------------------------------------------------------------------------------------------------------------------------------------------------------------------------------------------------------------------------------------------------|----------------------------------------------------------------------------------------------------------------------------------------------------------------------------------------------------------------------------------------------------------------------------------------------------------------------------------------------------------------------------------------------------------------------------------------------------------------------------------------------------------------------------------------------------------------------------------------------------------------------------------------------------------------------------------------------------------------------------------------------|---|-------------------------------|----------------------------------------------|-------|
|  | Mixed | <p>Fungivorous arthropods, including:</p> <p>Sarcoptiformes (Oribatida): <i>Acrotrititia ardua</i> (Koch) (= <i>Rhysotrititia ardua</i>) (Euphthiracaridae), <i>Autogneta</i> (<i>Conchogneta traegardhi</i> Forsslund (Autognetidae), <i>Camisia</i> (<i>C.</i>) <i>biurus</i> (Koch) (Crotoniidae), <i>Ceratozetella</i> (<i>C.</i>) <i>thienemanni</i> (Willmann) (= <i>Ceratozetes thienemanni</i>) (Ceratozetidae), <i>Heminothrus</i> (<i>H.</i>) <i>paolianus</i> (Berlese) (Crotoniidae), <i>Hemileius</i> (<i>H.</i>) <i>initialis</i> (Berlese) (Hemileiidae), <i>Nanhermannia</i> (<i>N.</i>) <i>sellnicki</i> Forsslund/<i>Nanhermannia</i> (<i>N.</i>) <i>nana</i> (Nicolet) (Nanhermanniidae), <i>Nothrus silvestris</i> Nicolet (Nothridae), <i>Oppia</i> spp. (Oppiidae), <i>Oppiella nova</i> (Oudemans) (Oppiidae), <i>Phthiracarus</i> (<i>P.</i>) <i>longulus</i> (Koch) (= <i>Phthiracarus tardus</i> Forsslund) (Phthiracaridae), <i>Porobelba spinosa</i> (Sellnick) (Damaeidae), <i>Scheloribates</i> spp. (Scheloribatidae), <i>Steganacarus</i> (<i>Tropacarus</i>) <i>carinatus</i> (Koch) (Phthiracaridae), <i>Suctobelba</i> sp. (Suctobelbidae),</p> | <p>Root/fungal feeders [FL, PP]:</p> <p><i>Aphelenchoides</i> spp. (Aphelenchoididae), <i>Ditylenchus</i> spp. (Anguinidae), <i>Malenchus</i> spp. (Tylenchidae), <i>Tylenchus</i> spp. (Tylenchidae), others</p> <p>Bacterial feeders [FL]:</p> <p><i>Acrobeloides</i> spp. (Cephalobidae), <i>Alaimus</i> spp. (Alaimidae), <i>Bunonema</i> spp. (Bunonematidae), <i>Cervidellus</i> spp. (Cephalobidae), <i>Metateratocephalus</i> spp. (Metateratocephalidae), <i>Monhystera</i> spp. (Monhysteridae), <i>Plectus</i> spp. (Plectidae), <i>Teratocephalus</i> spp. (Teratocephalidae), <i>Wilsonema</i> spp. (Plectidae)</p> <p>Omnivores/predators [FL]:</p> <p><i>Clarkus</i> (= <i>Clarcus</i>) (Mononchidae), <i>Dorylaimida</i></p> | - | Nematode abundance reduce 12% | Lab: Microcosms with coniferous forest soil) | [233] |
|--|-------|------------------------------------------------------------------------------------------------------------------------------------------------------------------------------------------------------------------------------------------------------------------------------------------------------------------------------------------------------------------------------------------------------------------------------------------------------------------------------------------------------------------------------------------------------------------------------------------------------------------------------------------------------------------------------------------------------------------------------------------------------------------------------------------------------------------------------------------------------------------------------------------------------------------------------------------------------------------------------------------------------------------------------------------------------------------------------------------------------------------------------------------------------------------------------------|----------------------------------------------------------------------------------------------------------------------------------------------------------------------------------------------------------------------------------------------------------------------------------------------------------------------------------------------------------------------------------------------------------------------------------------------------------------------------------------------------------------------------------------------------------------------------------------------------------------------------------------------------------------------------------------------------------------------------------------------|---|-------------------------------|----------------------------------------------|-------|

|  |  |                                                                                                                                                                                                                                                                                                                                                                                                                                                 |                                                                                                                                                                                                                                                                                                                                                                                                                                                                                                                                                                                                                                                                                                                                                                                            |   |                                  |                                                      |       |
|--|--|-------------------------------------------------------------------------------------------------------------------------------------------------------------------------------------------------------------------------------------------------------------------------------------------------------------------------------------------------------------------------------------------------------------------------------------------------|--------------------------------------------------------------------------------------------------------------------------------------------------------------------------------------------------------------------------------------------------------------------------------------------------------------------------------------------------------------------------------------------------------------------------------------------------------------------------------------------------------------------------------------------------------------------------------------------------------------------------------------------------------------------------------------------------------------------------------------------------------------------------------------------|---|----------------------------------|------------------------------------------------------|-------|
|  |  | <i>Tectocephus velatus</i><br>(Michael) (Tectocephidae),<br>unidentified species<br>(Brachychthoniidae)                                                                                                                                                                                                                                                                                                                                         |                                                                                                                                                                                                                                                                                                                                                                                                                                                                                                                                                                                                                                                                                                                                                                                            |   |                                  |                                                      |       |
|  |  | Fungivores (Oribatida,<br>listed above) + predators,<br>including:<br>Mesostigmata:<br><i>Paragamasus lapponicus</i><br>(Trägårdh) (= <i>Pergamasus</i><br><i>lapponicus</i> Trägårdh)<br>(Parasitidae), <i>Parazercon</i><br><i>sarekensis</i> Willmann<br>(Zerconidae), <i>Pergamasus</i><br><i>brevicornis</i> Berlese<br>(Parasitidae), <i>Veigaia</i><br><i>nemorensis</i> (Koch)<br>(Veigaiidae), <i>Trachytes</i> sp.<br>(Polyaspididae) | Root/fungal feeders [FL,<br>PP]:<br><i>Aphelenchoides</i> spp.<br>(Aphelenchoididae),<br><i>Ditylenchus</i> spp.<br>(Anguinidae), <i>Malenchus</i><br>spp. (Tylenchidae),<br><i>Tylenchus</i> spp.<br>(Tylenchidae), others<br><br>Bacterial feeders [FL]:<br><i>Acrobeloides</i> spp.<br>(Cephalobidae), <i>Alaimus</i><br>spp. (Alaimidae),<br><i>Bunonema</i> spp.<br>(Bunonematidae),<br><i>Cervidellus</i> spp.<br>(Cephalobidae),<br><i>Metateratocephalus</i> spp.<br>(Metateratocephalidae),<br><i>Monhystera</i> spp.<br>(Monhysteridae), <i>Plectus</i><br>spp. (Plectidae),<br><i>Teratocephalus</i> spp.<br>(Teratocephalidae),<br><i>Wilsonema</i> spp. (Plectidae)<br><br>Omnivores/predators:<br><i>Clarkus</i> (= <i>Clarcus</i> )<br>(Mononchidae),<br><i>Dorylaimida</i> | - | Nematode abundance<br>reduce 24% | Lab:<br>Microcosms with<br>coniferous forest<br>soil | [233] |

|               |          |                                                                                                                                                                      |                                                                                                                                                                                                                |   |                                                                                                                                       |                                                                                                                                     |       |
|---------------|----------|----------------------------------------------------------------------------------------------------------------------------------------------------------------------|----------------------------------------------------------------------------------------------------------------------------------------------------------------------------------------------------------------|---|---------------------------------------------------------------------------------------------------------------------------------------|-------------------------------------------------------------------------------------------------------------------------------------|-------|
|               | Mixed    | Invertebrates in natural soil or agricultural soils, including Oribatida (Sarcoptiformes), and non-Oribatida (probably Mesostigmata and Trombidiformes: Prostigmata) | <i>Meloidogyne incognita</i> (Kofoed & White) Chitwood (Meloidogynidae) [PP]                                                                                                                                   | - | Greater number of mites in natural soils, which was consistent with the <i>M. incognita</i> suppression                               | Greenhouse: Pots with <i>Solenostemon scutellarioides</i> (L.) Codd (= <i>Coleus blumei</i> Benth) in natural and agricultural soil | [234] |
|               | Mixed    | Mix, including predators, omnivores, fungivore-saprophyte, algivore (probably Mesostigmata, Sarcoptiformes and Trombidiformes)                                       | Mix, including bacterial feeders, fungal feeders, plant feeders, omnivorous and predators [FL, PP]                                                                                                             | - | Bacterial-feeding nematodes, fungivore/saprophyte mites and predatory nematodes and mites more abundant in organic-no till management | Field: Plots with conventional management, organic management, standard tillage, conservation tillage, no tillage                   | [50]  |
|               | Unknown  | Two unidentified species                                                                                                                                             | <i>Tylenchulus semipenetrans</i> Cobb (Tylenchulidae) [PP]                                                                                                                                                     | - | -                                                                                                                                     | Lab: Observation from soil samples collected in field                                                                               | [235] |
| Endeostigmata | Alycidae | <i>Alycus roseus</i> Koch                                                                                                                                            | Mix of <i>Acrobeloides nanus</i> (de Man) Anderson (= <i>Acrobeloides labiatus</i> Ivanova) (Cephalobidae), <i>Aphelenchus avenae</i> Bastian (Aphelenchidae), <i>Panagrolaimus</i> sp. (Panagrolaimidae) [FL] | - | Reared from larva to adult                                                                                                            | Lab                                                                                                                                 | [121] |

|  |  |                   |                                                                                                                                                                                                                                                                                   |   |                                                                   |      |       |
|--|--|-------------------|-----------------------------------------------------------------------------------------------------------------------------------------------------------------------------------------------------------------------------------------------------------------------------------|---|-------------------------------------------------------------------|------|-------|
|  |  |                   | Mix of <i>Acrobeloides</i> spp. (Cephalobidae), <i>Aphelenchoides</i> sp. (Aphelenchoididae), and <i>Aphelenchus avenae</i> Bastian (Aphelenchidae), <i>Panagrolaimus</i> sp. (Panagrolaimidae) [FL]                                                                              | - | Reared                                                            | Lab  | [7]   |
|  |  |                   | Mix of <i>Panagrolaimus</i> sp. (Panagrolaimidae), <i>Acrobeloides nanus</i> (de Man) Anderson (= <i>Cephalobus nanus</i> ) and <i>Acrobeloides</i> spp. (Cephalobidae), <i>Aphelenchoides</i> sp. (Aphelenchoididae), and <i>Aphelenchus avenae</i> Bastian (Aphelenchidae) [FL] | - | Reared from larva to adult                                        | Lab  | [6]   |
|  |  |                   | <i>Steinernema feltiae</i> (Filipjev) Wouts, Mráček, Gerdin & Bedding (Steinernematidae) [AP]                                                                                                                                                                                     | - | Reproduction occurred<br><br>Reared only from protonymph to adult | Lab  | [112] |
|  |  |                   | Unidentified nematode [possibly FL]                                                                                                                                                                                                                                               | - | Reared from larva to adult                                        | Lab? | [97]  |
|  |  | <i>Alycus</i> sp. | Mix of <i>Acrobeloides nanus</i> (de Man) Anderson (= <i>Acrobeloides labiatus</i> Ivanova) (Cephalobidae), <i>Aphelenchus avenae</i> Bastian (Aphelenchidae), <i>Panagrolaimus</i> sp. (Panagrolaimidae) [FL]                                                                    | - | Reared from larva to adult                                        | Lab  | [121] |

|  |                |                                     |                                                                                                                                                                                                                |   |                            |     |       |
|--|----------------|-------------------------------------|----------------------------------------------------------------------------------------------------------------------------------------------------------------------------------------------------------------|---|----------------------------|-----|-------|
|  |                | <i>Alycus</i> sp.2                  | Mix of <i>Acrobeloides</i> spp. (Cephalobidae), <i>Aphelenchoides</i> sp. (Aphelenchoididae), and <i>Aphelenchus avenae</i> Bastian (Aphelenchidae), <i>Panagrolaimus</i> sp. (Panagrolaimidae) [FL]           | - | Reared                     | Lab | [7]   |
|  | Alicorhagiidae | <i>Alicorhagia fragilis</i> Berlese | Mix of <i>Acrobeloides nanus</i> (de Man) Anderson (= <i>Acrobeloides labiatus</i> Ivanova) (Cephalobidae), <i>Aphelenchus avenae</i> Bastian (Aphelenchidae), <i>Panagrolaimus</i> sp. (Panagrolaimidae) [FL] | - | Reared from larva to adult | Lab | [121] |
|  |                |                                     | Mix of <i>Acrobeloides</i> spp. (Cephalobidae), <i>Aphelenchoides</i> sp. (Aphelenchoididae), and <i>Aphelenchus avenae</i> Bastian (Aphelenchidae), <i>Panagrolaimus</i> sp. (Panagrolaimidae) [FL]           | - | Reared                     | Lab | [7]   |

|  |  |                                                 |                                                                                                                                                                                                                                                                                   |                                                                                     |                                                                                                                             |      |       |
|--|--|-------------------------------------------------|-----------------------------------------------------------------------------------------------------------------------------------------------------------------------------------------------------------------------------------------------------------------------------------|-------------------------------------------------------------------------------------|-----------------------------------------------------------------------------------------------------------------------------|------|-------|
|  |  |                                                 | Mix of <i>Panagrolaimus</i> sp. (Panagrolaimidae), <i>Acrobeloides nanus</i> (de Man) Anderson (= <i>Cephalobus nanus</i> ) and <i>Acrobeloides</i> spp. (Cephalobidae), <i>Aphelenchoides</i> sp. (Aphelenchoididae), and <i>Aphelenchus avenae</i> Bastian (Aphelenchidae) [FL] | -                                                                                   | Reared from larva to adult                                                                                                  | Lab  | [6]   |
|  |  |                                                 | <i>Panagrolaimus</i> sp. 1 (Panagrolaimidae) [FL]                                                                                                                                                                                                                                 | (CM) [ <i>Cladosporium herbarum</i> (Pers.) Link (Dothideomycete: Cladosporiaceae)] | 0.68 eggs/female/day with nematode + fungi<br><br>Daily oviposition 6.8x higher with nematode + fungi than with fungi alone | Lab  | [121] |
|  |  |                                                 | <i>Steinernema feltiae</i> (Filipjev) Wouts, Mráček, Gerdin & Bedding (Steinernematidae) [AP]                                                                                                                                                                                     | -                                                                                   | -                                                                                                                           | Lab  | [112] |
|  |  |                                                 | Unidentified nematode [possibly FL]                                                                                                                                                                                                                                               | -                                                                                   | Cultured through several generations                                                                                        | Lab  | [98]  |
|  |  |                                                 | Unidentified nematode [possibly FL]                                                                                                                                                                                                                                               | -                                                                                   | Reared from larva to adult                                                                                                  | Lab? | [97]  |
|  |  | <i>Alicorhagia usitata</i> Théron, Meyer & Ryke | Mix of <i>Acrobeloides</i> spp. (Cephalobidae), <i>Aphelenchoides</i> sp. (Aphelenchoididae), and <i>Aphelenchus avenae</i> Bastian (Aphelenchidae), <i>Panagrolaimus</i> sp. (Panagrolaimidae) [FL]                                                                              | -                                                                                   | Reared                                                                                                                      | Lab  | [7]   |



|                            |       |                                                                                                                                                                                                                                                                                                                        |                                                                                                                                                                                                                                                                                   |   |                                                                                                                                                   |                     |       |
|----------------------------|-------|------------------------------------------------------------------------------------------------------------------------------------------------------------------------------------------------------------------------------------------------------------------------------------------------------------------------|-----------------------------------------------------------------------------------------------------------------------------------------------------------------------------------------------------------------------------------------------------------------------------------|---|---------------------------------------------------------------------------------------------------------------------------------------------------|---------------------|-------|
|                            |       |                                                                                                                                                                                                                                                                                                                        | Mix of <i>Panagrolaimus</i> sp. (Panagrolaimidae), <i>Acrobeloides nanus</i> (de Man) Anderson (= <i>Cephalobus nanus</i> ) and <i>Acrobeloides</i> spp. (Cephalobidae), <i>Aphelenchoides</i> sp. (Aphelenchoididae), and <i>Aphelenchus avenae</i> Bastian (Aphelenchidae) [FL] | - | Reared from larva to adult                                                                                                                        | Lab                 | [6]   |
|                            |       |                                                                                                                                                                                                                                                                                                                        | Unidentified nematode [possibly FL]                                                                                                                                                                                                                                               | - | Reared from larva to adult                                                                                                                        | Lab?                | [97]  |
| Mesostigmata (all groups?) | Mixed | Unidentified species of soil predatory mites                                                                                                                                                                                                                                                                           | Nematodes from citrus orchards (including <i>Tylenchulus semipenetrans</i> Cobb (Tylenchulidae)) [FL, PP]                                                                                                                                                                         | - | Relation between mite and nematodes population<br><br>Predatory mites appear to control plant parasitic nematodes in soils rich in organic matter | Field: Observations | [123] |
|                            | Mixed | Mites associated with fungal sporopocarp including <i>Lasioseius boomsmai</i> Womersley and <i>Lasioseius queenslandicus</i> (Womersley) (Blattisociidae) and new species of Ascidae, Digamasellidae, Cercomegistidae, Laelapidae, Uropodidae, Ologamasidae, Sejidae, Triplogyniidae, and an unidentified Trigynaspida | Unidentified nematode [possibly FL]                                                                                                                                                                                                                                               | - | -                                                                                                                                                 | Lab                 | [236] |

|  |       |                                                                                                                                                                                                                                                                                                                                                                                                                                       |                                                                    |   |                                                                                                                      |                                                                   |                      |
|--|-------|---------------------------------------------------------------------------------------------------------------------------------------------------------------------------------------------------------------------------------------------------------------------------------------------------------------------------------------------------------------------------------------------------------------------------------------|--------------------------------------------------------------------|---|----------------------------------------------------------------------------------------------------------------------|-------------------------------------------------------------------|----------------------|
|  | Mixed | <i>Lasioseius queenslandicus</i> (Womersley) (= <i>Lasioseius athiasae</i> Nawar & Nasr) (Blattisociidae) and <i>Protogamasellopsis dioscorus</i> (Manson) (= <i>Protogamasellus dioscorus</i> Manson) (Rhodacaridae)                                                                                                                                                                                                                 | <i>Meloidogyne javanica</i> (Treub) Chitwood (Meloidogynidae) [PP] | - | Presence of mites significantly reduced nematode galls, immature females, and the total number of nematodes          | Greenhouse?: Pots with <i>Phaseolus vulgaris</i> L. (Leguminosae) | [122] cited by [124] |
|  | Mixed | Species of soil predatory mites from citrus orchards, with the following dominant species: <i>Gaeolaelaps koseii</i> (Hafez, ElBadry & Nasr) (= <i>Hypoaspis koseii</i> ) (Laelapidae), <i>Gamasiphis denticus</i> Hafez & Nasr (Ologamasidae), <i>Gamasiphis pulchellus</i> (Berlese) (Ologamasidae), <i>Nenteria hypotrichus</i> (El-Borolossy & El-Banhawy) (Uropodidae), <i>Uroobovella krantzi</i> Zaher & Afifi (Urodinychidae) | <i>Tylenchulus semipenetrans</i> Cobb (Tylenchulidae) [PP]         | - | Localities with high densities of Gamasida, very low infestations of <i>T. semipenetrans</i> nematodes were reported | Field: Observations                                               | [237]                |

|                         |         |                                                                                                                                                                                           |                                                                                                                                                                                                      |                                                                                                 |                                                                                                                                                |                                                                                                                                                                                                                                   |       |
|-------------------------|---------|-------------------------------------------------------------------------------------------------------------------------------------------------------------------------------------------|------------------------------------------------------------------------------------------------------------------------------------------------------------------------------------------------------|-------------------------------------------------------------------------------------------------|------------------------------------------------------------------------------------------------------------------------------------------------|-----------------------------------------------------------------------------------------------------------------------------------------------------------------------------------------------------------------------------------|-------|
|                         | Mixed   | Unidentified species of Laelapidae and genera <i>Gamasiphis</i> (Ologamasidae), <i>Holaspulus</i> (Parholaspididae), <i>Protogamasellus</i> (Ascidae), and mainly <i>Sejus</i> (Sejidae), | <i>Meloidogyne incognita</i> (Kofoed & White) Chitwood (Meloidogynidae) [PP]                                                                                                                         | (M) Other invertebrates, including free-living nematodes (predators, fungivores, bacteriovores) | Observed in all the sawdust-based amendments, coinciding with lower number of <i>M. incognita</i> and fewer galls than sterilized soil or sand | Field:<br>Sweetpotato ( <i>Ipomoea batatas</i> (L.) Lam. (Convolvulaceae)) in pots with/without sawdust amendment<br><br>Greenhouse:<br>with tomato ( <i>Solanum lycopersicum</i> L. (Solanaceae)) with/without sawdust amendment | [105] |
| Mesostigmata (Gamasina) | Ascidae | <i>Antennoseius</i> n. sp.                                                                                                                                                                | Mix of <i>Acrobeloides</i> spp. (Cephalobidae), <i>Aphelenchoides</i> sp. (Aphelenchoididae), and <i>Aphelenchus avenae</i> Bastian (Aphelenchidae), <i>Panagrolaimus</i> sp. (Panagrolaimidae) [FL] | -                                                                                               | Reared                                                                                                                                         | Lab                                                                                                                                                                                                                               | [7]   |
|                         |         | <i>Antennoseius</i> n. sp.                                                                                                                                                                | <i>Rhabditis</i> sp. (Rhabditidae) [FL]                                                                                                                                                              | -                                                                                               | Reproduction occurred                                                                                                                          | Lab                                                                                                                                                                                                                               | [134] |
|                         |         | <i>Antennoseius</i> ( <i>Vitzthumia</i> ) <i>janus</i> Lindquist & Walter                                                                                                                 | <i>Aphelenchus avenae</i> Bastian (Aphelenchidae) [FL]                                                                                                                                               | -                                                                                               | Reared from larva to adult                                                                                                                     | Lab                                                                                                                                                                                                                               | [238] |
|                         |         |                                                                                                                                                                                           | <i>Panagrolaimus</i> sp. (Panagrolaimidae) [FL]                                                                                                                                                      | -                                                                                               | Reared from larva to adult                                                                                                                     | Lab                                                                                                                                                                                                                               | [238] |
|                         |         |                                                                                                                                                                                           | <i>Rhabditis</i> sp. (Rhabditidae) [FL]                                                                                                                                                              | -                                                                                               | Reproduction occurred                                                                                                                          | Lab                                                                                                                                                                                                                               | [134] |

|  |  |                                                                                            |                                                                                                                                                                                                      |   |                                                                                      |                     |       |
|--|--|--------------------------------------------------------------------------------------------|------------------------------------------------------------------------------------------------------------------------------------------------------------------------------------------------------|---|--------------------------------------------------------------------------------------|---------------------|-------|
|  |  |                                                                                            | <i>Steinernema carpocapsae</i> (Weiser) Wouts, Mráček, Gerdin & Bedding (= <i>Neoplectana carpocapsae</i> Kozek) (Steinernematidae) [AP]                                                             | - | -                                                                                    | Lab                 | [238] |
|  |  | <i>Antennoseius</i> ( <i>Antennoseius</i> ) <i>lobochelus</i> Halliday, Walter & Lindquist | Mix of <i>Panagrellus</i> sp. (Panagrolaimidae) and unidentified nematodes isolated from soil samples [FL]                                                                                           | - | 2 – 5 eggs/female/day<br><br>Reared from larva to adult<br><br>Reproduction occurred | Lab                 | [239] |
|  |  | <i>Antennoseius</i> sp.                                                                    | <i>Steinernema feltiae</i> (Filipjev) Wouts, Mráček, Gerdin & Bedding (Steinernematidae) [AP]                                                                                                        | - | Survival only in larval stage                                                        | Lab                 | [112] |
|  |  | <i>Arctoseius cetratus</i> (Sellnick) (= <i>Arctoseius bispinatus</i> )                    | <i>Acrobeloides</i> sp. (Cephalobidae) [FL]                                                                                                                                                          | - | Devel. time = 5.4 ± 0.1 days                                                         | Lab                 | [59]  |
|  |  |                                                                                            | <i>Globodera rostochiensis</i> (Wollenweber) Skarbilovich (= <i>Heterodera rostochiensis</i> Wollenweber) (Heteroderidae) [PP]                                                                       | - | 1.7-fold in a field contaminated with <i>G. rostochiensis</i>                        | Field: Observations | [103] |
|  |  |                                                                                            | Mix of <i>Acrobeloides</i> spp. (Cephalobidae), <i>Aphelenchoides</i> sp. (Aphelenchoididae), and <i>Aphelenchus avenae</i> Bastian (Aphelenchidae), <i>Panagrolaimus</i> sp. (Panagrolaimidae) [FL] | - | Reared                                                                               | Lab                 | [7]   |

|  |  |  |                                                                                                                                                                                                                                                                                   |                                                                              |                                                                          |      |             |
|--|--|--|-----------------------------------------------------------------------------------------------------------------------------------------------------------------------------------------------------------------------------------------------------------------------------------|------------------------------------------------------------------------------|--------------------------------------------------------------------------|------|-------------|
|  |  |  | Mix of <i>Panagrolaimus</i> sp. (Panagrolaimidae), <i>Acrobeloides nanus</i> (de Man) Anderson (= <i>Cephalobus nanus</i> ) and <i>Acrobeloides</i> spp. (Cephalobidae), <i>Aphelenchoides</i> sp. (Aphelenchoididae), and <i>Aphelenchus avenae</i> Bastian (Aphelenchidae) [FL] | -                                                                            | -                                                                        | Lab  | [6]         |
|  |  |  | <i>Rhabditis</i> spp. (Rhabditidae) [FL]                                                                                                                                                                                                                                          | -                                                                            | Reproduction occurred                                                    | Lab  | [170]       |
|  |  |  | <i>Rhabditis</i> sp. (Rhabditidae) [FL]                                                                                                                                                                                                                                           | -                                                                            | Reproduction occurred                                                    | Lab  | [134]       |
|  |  |  | Unidentified small nematodes collected from decaying organic matter [possible FL]                                                                                                                                                                                                 | -                                                                            | Reproduction occurred                                                    | Lab  | [240]       |
|  |  |  | Unidentified fungal-feeding nematode [possible FL]                                                                                                                                                                                                                                | -                                                                            | -                                                                        | Lab  | [241,242]   |
|  |  |  | Unidentified nematode [possible FL]                                                                                                                                                                                                                                               | (C) [Sciarid eggs (Insecta: Diptera: Sciaridae)]                             | Higher mortality and lower oviposition by mites fed only on nematodes    | Lab  | [131]<br>iv |
|  |  |  | Unidentified nematode [possibly FL]                                                                                                                                                                                                                                               | -                                                                            | -                                                                        | Lab  | [243]       |
|  |  |  | Unidentified nematode [possibly FL]                                                                                                                                                                                                                                               | -                                                                            | Reared from larva to adult                                               | Lab? | [97]        |
|  |  |  | Unidentified nematode [possibly FL]                                                                                                                                                                                                                                               | (C) [unidentified Collembola, unidentified Acaridae (Acari: Sarcoptiformes)] | Addition of nematodes increased the population more than with other prey | Lab  | [173]       |

|  |  |                                             |                                                                                                                                                                                                                              |   |                            |     |                    |
|--|--|---------------------------------------------|------------------------------------------------------------------------------------------------------------------------------------------------------------------------------------------------------------------------------|---|----------------------------|-----|--------------------|
|  |  |                                             | Unidentified nematode<br>[possibly FL]                                                                                                                                                                                       | - | -                          | Lab | [244] <sup>v</sup> |
|  |  | <i>Arctoseius confusus</i><br>Lindquist     | <i>Rhabditis</i> sp. (Rhabditidae)<br>[FL]                                                                                                                                                                                   | - | Reproduction occurred      | Lab | [134]              |
|  |  | <i>Arctoseius idiodactylus</i><br>Lindquist | <i>Rhabditis</i> sp. (Rhabditidae)<br>[FL]                                                                                                                                                                                   | - | Reproduction occurred      | Lab | [134]              |
|  |  | <i>Arctoseius</i> n. sp.                    | <i>Rhabditis</i> sp. (Rhabditidae)<br>[FL]                                                                                                                                                                                   | - | Reproduction occurred      | Lab | [134]              |
|  |  | <i>Arctoseius semiscissus</i><br>(Berlese)  | Unidentified nematode<br>[FL]                                                                                                                                                                                                | - | Reared from larva to adult | Lab | [245]              |
|  |  | <i>Asca</i> sp.                             | <i>Cephalobus</i><br>sp. (Cephalobidae)<br>[FL]                                                                                                                                                                              | - | -                          | Lab | [115]              |
|  |  | <i>Asca aphidioides</i> (L.)                | Mix of <i>Panagrellus silusiae</i><br>(de Man)<br>(Panagrolaimidae) and<br><i>Rhabditis</i><br>sp. (Rhabditidae)<br>[FL]                                                                                                     | - | -                          | Lab | [160]              |
|  |  | <i>Asca brachychaeta</i> Hurlbutt           | <i>Rhabditis</i> sp. (Rhabditidae)<br>[FL]                                                                                                                                                                                   | - | Reproduction occurred      | Lab | [134]              |
|  |  | <i>Asca garmani</i> Hurlbutt                | Mix of <i>Acrobeloides</i> spp.<br>(Cephalobidae),<br><i>Aphelenchoides</i> sp.<br>(Aphelenchoididae), and<br><i>Aphelenchus avenae</i> Bastian<br>(Aphelenchidae),<br><i>Panagrolaimus</i> sp.<br>(Panagrolaimidae)<br>[FL] | - | Reared                     | Lab | [7]                |
|  |  |                                             | Mix of <i>Panagrellus silusiae</i><br>(de Man)<br>(Panagrolaimidae) and<br><i>Rhabditis</i><br>sp. (Rhabditidae)<br>[FL]                                                                                                     | - | -                          | Lab | [160]              |

|  |  |                                                                   |                                                                                                                                                                                                                              |   |                            |      |       |
|--|--|-------------------------------------------------------------------|------------------------------------------------------------------------------------------------------------------------------------------------------------------------------------------------------------------------------|---|----------------------------|------|-------|
|  |  |                                                                   | <i>Rhabditis</i> sp. (Rhabditidae)<br>[FL]                                                                                                                                                                                   | - | Reproduction occurred      | Lab  | [134] |
|  |  | <i>Asca macromela</i> Walter,<br>Halliday & Lindquist             | <i>Rhabditis</i> sp. (Rhabditidae)<br>[FL]                                                                                                                                                                                   | - | Reproduction occurred      | Lab  | [134] |
|  |  | <i>Asca mindi</i> Walter, Halliday<br>& Lindquist                 | <i>Rhabditis</i> sp. (Rhabditidae)<br>[FL]                                                                                                                                                                                   | - | Reproduction occurred      | Lab  | [134] |
|  |  | <i>Asca nesoica</i> Athias-Henriot                                | Mix of <i>Acrobeloides</i> spp.<br>(Cephalobidae),<br><i>Aphelenchoides</i> sp.<br>(Aphelenchoididae), and<br><i>Aphelenchus avenae</i> Bastian<br>(Aphelenchidae),<br><i>Panagrolaimus</i> sp.<br>(Panagrolaimidae)<br>[FL] | - | Reared                     | Lab  | [7]   |
|  |  |                                                                   | <i>Rhabditis</i> sp. (Rhabditidae)<br>[FL]                                                                                                                                                                                   | - | Reproduction occurred      | Lab  | [134] |
|  |  |                                                                   | <i>Heterorhabditis heliothidis</i><br>Khan, Brooks &<br>Hirschmann<br>(Heterorhabditidae)<br>[AP]                                                                                                                            | - | -                          | Lab  | [112] |
|  |  |                                                                   | <i>Steinernema feltiae</i> (Filipjev)<br>Wouts, Mráček, Gerdin &<br>Bedding<br>(Steinernematidae)<br>[AP]                                                                                                                    | - | -                          | Lab  | [112] |
|  |  |                                                                   | Unidentified nematode<br>[possibly FL]                                                                                                                                                                                       | - | Reared from larva to adult | Lab? | [97]  |
|  |  | <i>Asca piloja</i> Hurlbutt (= <i>Asca</i><br>nr. <i>piloja</i> ) | <i>Rhabditis</i> sp. (Rhabditidae)<br>[FL]                                                                                                                                                                                   | - | Reproduction occurred      | Lab  | [134] |
|  |  |                                                                   | Unidentified nematode<br>[possibly FL]                                                                                                                                                                                       | - | Reared from larva to adult | Lab? | [97]  |

|  |  |                                                                           |                                                                                                                                                                                                                                                                                   |   |                               |     |       |
|--|--|---------------------------------------------------------------------------|-----------------------------------------------------------------------------------------------------------------------------------------------------------------------------------------------------------------------------------------------------------------------------------|---|-------------------------------|-----|-------|
|  |  | <i>Asca</i> cf. <i>piloja</i> Hurlbutt (= <i>Asca</i> nr. <i>piloja</i> ) | Mix of <i>Acrobeloides</i> spp. (Cephalobidae), <i>Aphelenchoides</i> sp. (Aphelenchoididae), and <i>Aphelenchus avenae</i> Bastian (Aphelenchidae), <i>Panagrolaimus</i> sp. (Panagrolaimidae) [FL]                                                                              | - | Reared                        | Lab | [7]   |
|  |  |                                                                           | Mix of <i>Panagrolaimus</i> sp. (Panagrolaimidae), <i>Acrobeloides nanus</i> (de Man) Anderson (= <i>Cephalobus nanus</i> ) and <i>Acrobeloides</i> spp. (Cephalobidae), <i>Aphelenchoides</i> sp. (Aphelenchoididae), and <i>Aphelenchus avenae</i> Bastian (Aphelenchidae) [FL] | - | Reared from larva to adult    | Lab | [6]   |
|  |  | <i>Asca</i> n. sp.                                                        | <i>Rhabditis</i> sp. (Rhabditidae) [FL]                                                                                                                                                                                                                                           | - | Reproduction occurred         | Lab | [134] |
|  |  | <i>Gamasellodes adriannae</i> Walter                                      | Mix of <i>Panagrellus silusiae</i> (de Man) (Panagrolaimidae) and <i>Rhabditis</i> sp. (Rhabditidae) [FL]                                                                                                                                                                         | - | -                             | Lab | [160] |
|  |  |                                                                           | Unidentified nematode [possible FL]                                                                                                                                                                                                                                               | - | -                             | Lab | [246] |
|  |  | <i>Gamasellodes bicolor</i> (Berlese)                                     | <i>Acrobeloides</i> sp. (Cephalobidae) [FL]                                                                                                                                                                                                                                       | - | Devel. time = 8.7 ± 0.03 days | Lab | [59]  |



|  |  |                                                                                       |                                                                                                                                                                                                                              |   |                                                                                                                         |                                                                                           |       |
|--|--|---------------------------------------------------------------------------------------|------------------------------------------------------------------------------------------------------------------------------------------------------------------------------------------------------------------------------|---|-------------------------------------------------------------------------------------------------------------------------|-------------------------------------------------------------------------------------------|-------|
|  |  |                                                                                       | <i>Meloidogyne incognita</i><br>(Kofoed & White)<br>Chitwood<br>(Meloidogynidae)<br>[PP]                                                                                                                                     | - | Colonized Root-knot<br>nematode culture (one of<br>the dominant species)<br><br>Laboratory cultures on<br>nematode prey | Greenhouse:<br>Pot cultures of<br>Root-knot<br>nematode ( <i>M.</i><br><i>incognita</i> ) | [117] |
|  |  |                                                                                       |                                                                                                                                                                                                                              | - | Colonization of pots, but<br>no population reduction of<br>nematodes was<br>demonstrated                                | Glasshouse:<br>Pots                                                                       | [134] |
|  |  |                                                                                       | Mix of <i>Acrobeloides</i> spp.<br>(Cephalobidae),<br><i>Aphelenchoides</i> sp.<br>(Aphelenchoididae), and<br><i>Aphelenchus avenae</i> Bastian<br>(Aphelenchidae),<br><i>Panagrolaimus</i> sp.<br>(Panagrolaimidae)<br>[FL] | - | Reared                                                                                                                  | Lab                                                                                       | [7]   |
|  |  |                                                                                       | <i>Rhabditis</i> sp. (Rhabditidae)<br>[FL]                                                                                                                                                                                   | - | Reproduction occurred                                                                                                   | Lab                                                                                       | [134] |
|  |  | <i>Gamasellodes claudiae</i> (= <i>Gamasellodes</i> n. sp. by Walter and Ikonen 1989) | <i>Acrobeloides</i> sp.<br>(Cephalobidae)<br>[FL]                                                                                                                                                                            | - | Devel. time = 7.5 ± 0.1 days                                                                                            | Lab                                                                                       | [59]  |
|  |  | <i>Gamasellodes rectiventris</i><br>Lindquist                                         | <i>Rhabditis</i> sp. (Rhabditidae)<br>[FL]                                                                                                                                                                                   | - | Reproduction occurred                                                                                                   | Lab                                                                                       | [134] |
|  |  |                                                                                       | <i>Meloidogyne incognita</i><br>(Kofoed & White)<br>Chitwood<br>(Meloidogynidae)<br>[PP]                                                                                                                                     | - | Colonized Root-knot<br>nematode culture<br><br>Laboratory cultures on<br>nematode prey                                  | Greenhouse:<br>Pot cultures of<br>Root-knot<br>nematode ( <i>M.</i><br><i>incognita</i> ) | [117] |
|  |  |                                                                                       |                                                                                                                                                                                                                              | - | Colonization of pots, but<br>no population reduction of<br>nematodes was<br>demonstrated                                | Glasshouse:<br>Pots                                                                       | [134] |

|  |  |                                          |                                                                                                                             |                                                                                                                                                                                                                                                                                                                                                                                                                                                                                                                                                                 |                                                                                                                             |     |       |
|--|--|------------------------------------------|-----------------------------------------------------------------------------------------------------------------------------|-----------------------------------------------------------------------------------------------------------------------------------------------------------------------------------------------------------------------------------------------------------------------------------------------------------------------------------------------------------------------------------------------------------------------------------------------------------------------------------------------------------------------------------------------------------------|-----------------------------------------------------------------------------------------------------------------------------|-----|-------|
|  |  |                                          | <i>Radopholus similis</i> (Cobb)<br>Thorne (= <i>Radopholus</i><br><i>citrophilus</i> Huettel, Dickson<br>& Kaplan)<br>[PP] | -                                                                                                                                                                                                                                                                                                                                                                                                                                                                                                                                                               | -                                                                                                                           | Lab | [94]  |
|  |  | <i>Gamasellodes vermivorax</i><br>Walter | <i>Acrobeloides nanus</i> (de Man)<br>(Cephalobidae)<br>[FL]                                                                | -                                                                                                                                                                                                                                                                                                                                                                                                                                                                                                                                                               | -                                                                                                                           | Lab | [59]  |
|  |  |                                          | <i>Acrobeloides</i> sp.<br>(Cephalobidae)<br>[FL]                                                                           | -                                                                                                                                                                                                                                                                                                                                                                                                                                                                                                                                                               | Devel. time = $6.7 \pm 0.2$ days<br>1.7 eggs/female/day                                                                     | Lab | [59]  |
|  |  |                                          | <i>Acrobeloides</i> sp.<br>(Cephalobidae)<br>[FL]                                                                           | (C)<br>[ <i>Alicorhagia fragilis</i><br>Berlese (Acari:<br>Endeostigmata:<br><i>Alicorhagiidae</i> ),<br><i>Aphelenchus</i> sp.<br>(Nematoda:<br><i>Aphelenchidae</i> ),<br><i>Eupodes</i> sp. (Acari:<br>Trombidiformes:<br><i>Eupodidae</i> ),<br><i>Mesaphorura silvicola</i><br>(Folsom) (= <i>Tullbergia</i><br><i>granulata</i> Mills)<br>(Collembola:<br><i>Tullbergiidae</i> ),<br><i>Oppiella</i> (O.) <i>nova</i><br>(Oudemans) (Acari:<br>Sarcoptiformes:<br><i>Oppidae</i> )<br><i>Panagrolaimus</i> sp.<br>(Nematoda:<br><i>Panagrolaimidae</i> )] | Devel. time = $6.3 \pm 0.3$ days<br>Oviposition occurred<br>Developmental time<br>shorter than with<br>Collembola and mites | Lab | [130] |

|  |  |  |                                                               |                                                                                                                                                                                                                                                                                                                                                                                                                                                                                                                 |                                                                                                                                     |     |       |
|--|--|--|---------------------------------------------------------------|-----------------------------------------------------------------------------------------------------------------------------------------------------------------------------------------------------------------------------------------------------------------------------------------------------------------------------------------------------------------------------------------------------------------------------------------------------------------------------------------------------------------|-------------------------------------------------------------------------------------------------------------------------------------|-----|-------|
|  |  |  | <i>Aphelenchus</i> sp.<br>(Aphelenchidae)<br>[FL]             | (C)<br>[ <i>Acrobeloides</i> sp.<br>(Nematoda:<br>Cephalobidae),<br><i>Alicorhagia fragilis</i><br>Berlese (Acari:<br>Endeostigmata:<br>Alicorhagiidae),<br><i>Eupodes</i> sp. (Acari:<br>Trombidiformes:<br>Eupodidae),<br><i>Mesaphorura silvicola</i><br>(Folsom) (= <i>Tullbergia</i><br><i>granulata</i> Mills)<br>(Collembola:<br>Tullbergiidae),<br><i>Oppiella</i> (O.) <i>nova</i><br>(Oudemans) (Acari:<br>Sarcoptiformes:<br>Oppidae)<br><i>Panagrolaimus</i> sp.<br>(Nematoda:<br>Panagrolaimidae)] | Devel. time = $6.1 \pm 0.1$ days<br><br>Oviposition occurred<br><br>Developmental time<br>shorter than with<br>Collembola and mites | Lab | [130] |
|  |  |  | ? <i>Aporcelaimus</i> sp.<br>(Aporcelaimidae)<br>[FL]         | -                                                                                                                                                                                                                                                                                                                                                                                                                                                                                                               | -                                                                                                                                   | Lab | [59]  |
|  |  |  | <i>Chiloplacus propinquus</i> (de<br>Man) (Cephalobidae) [FL] | -                                                                                                                                                                                                                                                                                                                                                                                                                                                                                                               | -                                                                                                                                   | Lab | [59]  |
|  |  |  | <i>Chrysonema</i> sp.<br>(Qudsianematidae)<br>[FL]            | -                                                                                                                                                                                                                                                                                                                                                                                                                                                                                                               | -                                                                                                                                   | Lab | [59]  |
|  |  |  | <i>Deladenus durus</i> (Cobb)<br>(Neotylenchidae)<br>[PP]     | -                                                                                                                                                                                                                                                                                                                                                                                                                                                                                                               | -                                                                                                                                   | Lab | [59]  |

|  |  |  |                                                                                                                                                                                                                                                                                                                                                       |   |                                                                                   |     |       |
|--|--|--|-------------------------------------------------------------------------------------------------------------------------------------------------------------------------------------------------------------------------------------------------------------------------------------------------------------------------------------------------------|---|-----------------------------------------------------------------------------------|-----|-------|
|  |  |  | <i>Heterorhabditis heliothidis</i><br>Khan, Brooks &<br>Hirschmann<br>(Heterorhabditidae)<br>[AP]                                                                                                                                                                                                                                                     | - | -                                                                                 | Lab | [112] |
|  |  |  | <i>Mesodorylaimus</i> sp.<br>(Dorylaimidae)<br>[FL]                                                                                                                                                                                                                                                                                                   | - | -                                                                                 | Lab | [59]  |
|  |  |  | Mix of <i>Acrobeloides</i> spp.<br>(Cephalobidae),<br><i>Aphelenchoides</i> sp.<br>(Aphelenchoididae),<br><i>Aphelenchus</i> sp.<br>(Aphelenchidae),<br><i>Panagrolaimus</i> sp.<br>(Panagrolaimidae), and<br><i>Steinernema carpocapsae</i><br>(Weiser) Wouts, Mráček,<br>Gerdin & Bedding (= <i>Neoaplectana carpocapsae</i><br>Weiser)<br>[FL, AP] | - | Reared from larva to adult<br><br>1.9 eggs/female/day<br>Generation time: 10 days | Lab | [247] |
|  |  |  | Mix of <i>Acrobeloides</i> spp.<br>(Cephalobidae),<br><i>Aphelenchoides</i> sp.<br>(Aphelenchoididae), and<br><i>Aphelenchus avenae</i> Bastian<br>(Aphelenchidae),<br><i>Panagrolaimus</i> sp.<br>(Panagrolaimidae)<br>[FL]                                                                                                                          | - | Reared                                                                            | Lab | [7]   |

|  |  |  |                                                                                                                                                                                                                                                                                   |                                                                                                                                                                                                                                                                                                                                   |                                                                                                      |                             |       |
|--|--|--|-----------------------------------------------------------------------------------------------------------------------------------------------------------------------------------------------------------------------------------------------------------------------------------|-----------------------------------------------------------------------------------------------------------------------------------------------------------------------------------------------------------------------------------------------------------------------------------------------------------------------------------|------------------------------------------------------------------------------------------------------|-----------------------------|-------|
|  |  |  | Mix of <i>Acrobeloides</i> sp. (Cephalobidae), <i>Aphelenchus</i> sp. (Aphelenchidae), <i>Panagrolaimus</i> sp. (Panagrolaimidae) [FL]                                                                                                                                            | (C)<br>[ <i>Alicorhagia fragilis</i> Berlese (Acari: Endeostigmata: Alicorhagiidae), <i>Eupodes</i> sp. (Acari: Trmbidiformes: Eupodidae), <i>Mesaphorura silvicola</i> (Folsom) (= <i>Tullbergia granulata</i> Mills) (Collembola: Tullbergiidae), <i>Oppiella</i> (O.) <i>nova</i> (Oudemans) (Acari: Sarcoptiformes: Oppidae)] | Devel. time = $6.1 \pm 0.6$ days<br><br>Shorter development time with nematodes than with arthropods | Lab                         | [7]   |
|  |  |  | Mix of <i>Panagrolaimus</i> sp. (Panagrolaimidae), <i>Acrobeloides nanus</i> (de Man) Anderson (= <i>Cephalobus nanus</i> ) and <i>Acrobeloides</i> spp. (Cephalobidae), <i>Aphelenchoides</i> sp. (Aphelenchoididae), and <i>Aphelenchus avenae</i> Bastian (Aphelenchidae) [FL] | -                                                                                                                                                                                                                                                                                                                                 | Reared from larva to adult                                                                           | Lab                         | [6]   |
|  |  |  | <i>Panagrolaimus</i> sp. (Panagrolaimidae) [FL]                                                                                                                                                                                                                                   | -                                                                                                                                                                                                                                                                                                                                 | Nematodes densities had a strong negative correlation with densities of the mite                     | Lab: Microcosms experiments | [247] |

|  |  |  |                                                                                                                |                                                                                                                                                                                                                                                                                                                                                                                                                                                                                                    |                                                                                                                          |     |       |
|--|--|--|----------------------------------------------------------------------------------------------------------------|----------------------------------------------------------------------------------------------------------------------------------------------------------------------------------------------------------------------------------------------------------------------------------------------------------------------------------------------------------------------------------------------------------------------------------------------------------------------------------------------------|--------------------------------------------------------------------------------------------------------------------------|-----|-------|
|  |  |  | <i>Panagrolaimus</i> sp.<br>(Panagrolaimidae)<br>[FL]                                                          | (C)<br>[ <i>Acrobeloides</i> sp.<br>(Nematoda:<br>Cephalobidae),<br><i>Alicorhagia fragilis</i><br>Berlese (Acari:<br>Endeostigmata:<br>Alicorhagiidae),<br><i>Aphelenchus</i> sp.<br>(Nematoda:<br>Aphelenchidae),<br><i>Eupodes</i> sp. (Acari:<br>Trombidiformes:<br>Eupodidae),<br><i>Mesaphorura silvicola</i><br>(Folsom) (= <i>Tullbergia granulata</i> Mills)<br>(Collembola:<br>Tullbergiidae),<br><i>Oppiella</i> (O.) <i>nova</i><br>(Oudemans) (Acari:<br>Sarcoptiformes:<br>Oppidae)] | Devel. time = $5.8 \pm 0.3$ days<br><br>Oviposition occurred<br><br>Developmental time shorter than with the other preys | Lab | [130] |
|  |  |  | <i>Pelodera</i> sp. (Rhabditidae)<br>[FL]                                                                      | -                                                                                                                                                                                                                                                                                                                                                                                                                                                                                                  | -                                                                                                                        | Lab | [59]  |
|  |  |  | <i>Rhabditis terricola</i> Dujardin<br>(Rhabditidae) [FL]                                                      | -                                                                                                                                                                                                                                                                                                                                                                                                                                                                                                  | -                                                                                                                        | Lab | [59]  |
|  |  |  | <i>Rhabditis</i> sp. (Rhabditidae)<br>[FL]                                                                     | -                                                                                                                                                                                                                                                                                                                                                                                                                                                                                                  | Reproduction occurred                                                                                                    | Lab | [134] |
|  |  |  | <i>Radopholus similis</i> (Cobb)<br>Thorne (= <i>Radopholus citrophilus</i> Huettel, Dickson & Kaplan)<br>[PP] | -                                                                                                                                                                                                                                                                                                                                                                                                                                                                                                  | -                                                                                                                        | Lab | [94]  |
|  |  |  |                                                                                                                | -                                                                                                                                                                                                                                                                                                                                                                                                                                                                                                  | Reared from larva to adult                                                                                               | Lab | [112] |

|  |  |                                      |                                                                                                                          |   |                                                         |      |       |
|--|--|--------------------------------------|--------------------------------------------------------------------------------------------------------------------------|---|---------------------------------------------------------|------|-------|
|  |  |                                      | <i>Steinernema feltiae</i> (Filipjev)<br>Wouts, Mráček, Gerdin &<br>Bedding<br>(Steinernematidae)<br>[AP]                | - | -                                                       | Lab  | [59]  |
|  |  |                                      | Unidentified nematode<br>[possibly FL]                                                                                   | - | Reared from larva to adult                              | Lab? | [97]  |
|  |  | <i>Gamasellodes</i> n. sp            | <i>Rhabditis</i> sp. (Rhabditidae)<br>[FL]                                                                               | - | Reproduction occurred                                   | Lab  | [134] |
|  |  | <i>Iphidozercon corticalis</i> Evans | Mix of <i>Panagrellus</i> sp.<br>(Panagrolaimidae) and<br>unidentified nematodes<br>isolated from soil samples<br>[FL]   | - | Reared from larva to adult<br><br>Reproduction occurred | Lab  | [239] |
|  |  |                                      | <i>Rhabditis</i> sp. (Rhabditidae)<br>[FL]                                                                               | - | Reproduction occurred                                   | Lab  | [134] |
|  |  | <i>Iphidozercon</i> n. sp. 1         | Mix of <i>Panagrellus silusiae</i><br>(de Man)<br>(Panagrolaimidae) and<br><i>Rhabditis</i><br>sp. (Rhabditidae)<br>[FL] | - | -                                                       | Lab  | [160] |
|  |  |                                      | <i>Rhabditis</i> sp. (Rhabditidae)<br>[FL]                                                                               | - | Reproduction occurred                                   | Lab  | [134] |
|  |  | <i>Iphidozercon</i> n. sp. 2         | <i>Rhabditis</i> sp. (Rhabditidae)<br>[FL]                                                                               | - | Reproduction occurred                                   | Lab  | [134] |

|  |  |                                            |                                                                                                                |                                                                                                      |                                                                                                                                                                                                                                                                                                                                                                        |     |       |
|--|--|--------------------------------------------|----------------------------------------------------------------------------------------------------------------|------------------------------------------------------------------------------------------------------|------------------------------------------------------------------------------------------------------------------------------------------------------------------------------------------------------------------------------------------------------------------------------------------------------------------------------------------------------------------------|-----|-------|
|  |  | <i>Protogamasellus denticus</i><br>Nasr    | <i>Meloidogyne incognita</i><br>(Kofoid & White)<br>Chitwood<br>(Meloidogynidae) eggs<br>masses and J2<br>[PP] | (C)<br>[ <i>Rhabditis</i> sp.<br>(Nematoda:<br>Rhabditidae)]                                         | Devel. time = $7.8 \pm 0.3$ days<br>(fed on eggs); $12.3 \pm 0.2$<br>days (fed on J2)<br><br>$3.4 \pm 0.1$ eggs/female/day<br>(fed on eggs); $2.2 \pm 0.0$<br>eggs/female/day (fed on<br>J2)<br><br>Fecundity = $61.1 \pm 1.3$<br>eggs/female (fed on eggs);<br>$38.2 \pm 0.8$ eggs/female (fed<br>on J2)<br><br>Daily oviposition higher<br>with <i>Rhabditis</i> sp. | Lab | [128] |
|  |  |                                            | <i>Rhabditis</i> sp. (Rhabditidae)<br>[FL]                                                                     | (C)<br>[ <i>Meloidogyne incognita</i><br>(Kofoid & White)<br>Chitwood (Nematoda:<br>Meloidogynidae)] | Devel. time = $8.9 \pm 0.2$ days<br><br>$3.6 \pm 0.0$ eggs/female/day<br>Fecundity = $66.8 \pm 2.1$<br>eggs/female<br><br>Daily oviposition 1.05 –<br>1.4x higher than with <i>M.</i><br><i>incognita</i>                                                                                                                                                              | Lab | [128] |
|  |  | <i>Protogamasellus hibernicus</i><br>Evans | <i>Acrobeloides</i> sp.<br>(Cephalobidae)<br>[FL]                                                              | -                                                                                                    | Devel. time = $15.7 \pm 0.2$<br>days                                                                                                                                                                                                                                                                                                                                   | Lab | [59]  |



|  |  |                                              |                                                                                                                                                                                                      |                                                                                                                                                                                                 |                                                                                                             |     |       |
|--|--|----------------------------------------------|------------------------------------------------------------------------------------------------------------------------------------------------------------------------------------------------------|-------------------------------------------------------------------------------------------------------------------------------------------------------------------------------------------------|-------------------------------------------------------------------------------------------------------------|-----|-------|
|  |  |                                              | Mix of <i>Acrobeloides</i> spp. (Cephalobidae), <i>Aphelenchoides</i> sp. (Aphelenchoididae), and <i>Aphelenchus avenae</i> Bastian (Aphelenchidae), <i>Panagrolaimus</i> sp. (Panagrolaimidae) [FL] | -                                                                                                                                                                                               | Reared                                                                                                      | Lab | [7]   |
|  |  |                                              | <i>Rhabditis</i> sp. (Rhabditidae) [FL]                                                                                                                                                              | -                                                                                                                                                                                               | Reproduction occurred                                                                                       | Lab | [134] |
|  |  | <i>Protogamasellus mica</i> (Athias-Henriot) | <i>Acrobeloides</i> sp. (Cephalobidae) [FL]                                                                                                                                                          | -                                                                                                                                                                                               | 2.0 eggs/female/day<br>Devel. time = $9.2 \pm 0.1$ days                                                     | Lab | [59]  |
|  |  |                                              | <i>Aphelenchus avenae</i> Bastian (Aphelenchidae) [FL]                                                                                                                                               | (C)<br>[ <i>Meloidogyne javanica</i> (Treub) Chitwood (Nematoda: Meloidogynidae), <i>Mesorhabditis</i> sp. (Nematoda: Rhabditidae), <i>Pratylenchus zeae</i> Graham (Nematoda: Pratylenchidae)] | Number of nematodes noticeably reduced                                                                      | Lab | [135] |
|  |  |                                              |                                                                                                                                                                                                      | (C)<br>[ <i>Meloidogyne javanica</i> (Treub) Chitwood (Nematoda: Meloidogynidae), <i>Mesorhabditis</i> sp. (Nematoda: Rhabditidae), <i>Pratylenchus zeae</i> Graham (Nematoda: Pratylenchidae)] | 2.1 $\pm$ 1.3 eggs/female/72 hours<br><br>Daily oviposition 1.4 – 2.1x higher than with the other nematodes | Lab | [129] |

|  |  |  |                                                                                           |                                                                                                                                                                                                             |                                                                                                |                                                                                     |       |
|--|--|--|-------------------------------------------------------------------------------------------|-------------------------------------------------------------------------------------------------------------------------------------------------------------------------------------------------------------|------------------------------------------------------------------------------------------------|-------------------------------------------------------------------------------------|-------|
|  |  |  | <i>Meloidogyne incognita</i><br>(Kofoid & White)<br>Chitwood<br>(Meloidogynidae)<br>[PP]  | -                                                                                                                                                                                                           | Colonization of pots, but<br>no population reduction of<br>nematodes was<br>demonstrated       | Glasshouse:<br>Pots with <i>Solanum<br/>melongena</i> L.<br>(Solanaceae)            | [134] |
|  |  |  |                                                                                           | -                                                                                                                                                                                                           | Colonized Root-knot<br>nematode culture<br><br>Laboratory cultures on<br>nematode prey         | Greenhouse:<br>Pot cultures of<br>Root-knot<br>nematode ( <i>M.<br/>incognita</i> ) | [117] |
|  |  |  | <i>Meloidogyne javanica</i><br>(Treub) Chitwood<br>(Meloidogynidae) egg<br>masses<br>[PP] | (C)<br>[ <i>Aphelenchus avenae</i><br>Bastian (Nematoda:<br>Aphelenchidae),<br><i>Mesorhabditis</i> sp.<br>(Nematoda:<br>Rhabditidae),<br><i>Pratylenchus zeae</i><br>Graham (Nematoda:<br>Pratylenchidae)] | Number of nematodes<br>noticeably reduced                                                      | Lab                                                                                 | [135] |
|  |  |  |                                                                                           | (C)<br>[ <i>Aphelenchus avenae</i><br>Bastian (Nematoda:<br>Aphelenchidae),<br><i>Mesorhabditis</i> sp.<br>(Nematoda:<br>Rhabditidae),<br><i>Pratylenchus zeae</i><br>Graham (Nematoda:<br>Pratylenchidae)] | 1.3 ± 1.2 eggs/female/72<br>hours<br><br>Daily oviposition lower<br>than with <i>A. avenae</i> | Lab                                                                                 | [129] |

|  |  |  |                                                                                                                                                        |                                                                                                                                                                                                                                       |                                                                                                        |                                                                                       |       |
|--|--|--|--------------------------------------------------------------------------------------------------------------------------------------------------------|---------------------------------------------------------------------------------------------------------------------------------------------------------------------------------------------------------------------------------------|--------------------------------------------------------------------------------------------------------|---------------------------------------------------------------------------------------|-------|
|  |  |  | <i>Mesorhabditis</i> sp.<br>(Rhabditidae)<br>[FL]                                                                                                      | (C)<br>[ <i>Aphelenchus avenae</i><br>Bastian (Nematoda:<br>Aphelenchidae),<br><i>Meloidogyne javanica</i><br>(Treub) Chitwood<br>(Nematoda:<br>Meloidogynidae),<br><i>Pratylenchus zeae</i><br>Graham (Nematoda:<br>Pratylenchidae)] | Number of nematodes<br>noticeably reduced                                                              | Lab                                                                                   | [135] |
|  |  |  | <i>Mesorhabditis</i> sp.<br>(Rhabditidae)<br>[FL]                                                                                                      | (C)<br>[ <i>Aphelenchus avenae</i><br>Bastian (Nematoda:<br>Aphelenchidae),<br><i>Meloidogyne javanica</i><br>(Treub) Chitwood<br>(Nematoda:<br>Meloidogynidae),<br><i>Pratylenchus zeae</i><br>Graham (Nematoda:<br>Pratylenchidae)] | 1 ± 1.6 eggs/female/72<br>hours<br>Reared<br><br>Daily oviposition lower<br>than with <i>A. avenae</i> | Lab                                                                                   | [129] |
|  |  |  | Mix of fungal-feeders and<br>bacterial-feeders<br>nematodes (Nematoda:<br>predominantly<br>Rhabditidae,<br>Cephalobidae, and<br>Aphelenchidae)<br>[FL] | (M)<br>[ <i>Pratylenchus zeae</i><br>Graham (Nematoda:<br>Pratylenchidae),<br><i>Tylenchorhynchus</i><br><i>annulatus</i> (Cassidy)<br>Golden (Nematoda:<br>Dolichodoridae)]                                                          | Reduction of the<br>nematode population                                                                | Greenhouse:<br>Pots with sugarcane<br>( <i>Saccharum</i> sp.<br>(Poaceae))<br><br>Lab | [135] |

|  |  |  |                                                                                                                                                                                                                                                                                   |                                                                                                                                                                                               |                                        |                                                                                 |       |
|--|--|--|-----------------------------------------------------------------------------------------------------------------------------------------------------------------------------------------------------------------------------------------------------------------------------------|-----------------------------------------------------------------------------------------------------------------------------------------------------------------------------------------------|----------------------------------------|---------------------------------------------------------------------------------|-------|
|  |  |  | Mix of <i>Acrobeloides</i> spp. (Cephalobidae), <i>Aphelenchoides</i> sp. (Aphelenchoididae), and <i>Aphelenchus avenae</i> Bastian (Aphelenchidae), <i>Panagrolaimus</i> sp. (Panagrolaimidae) [FL]                                                                              | -                                                                                                                                                                                             | Reared                                 | Lab                                                                             | [7]   |
|  |  |  | Mix of <i>Panagrolaimus</i> sp. (Panagrolaimidae), <i>Acrobeloides nanus</i> (de Man) Anderson (= <i>Cephalobus nanus</i> ) and <i>Acrobeloides</i> spp. (Cephalobidae), <i>Aphelenchoides</i> sp. (Aphelenchoididae), and <i>Aphelenchus avenae</i> Bastian (Aphelenchidae) [FL] | -                                                                                                                                                                                             | Reared from larva to adult             | Lab                                                                             | [6]   |
|  |  |  | <i>Pratylenchus zeae</i> Graham (Pratylenchidae) [PP]                                                                                                                                                                                                                             | (C) [ <i>Aphelenchus avenae</i> Bastian (Nematoda: Aphelenchidae), <i>Meloidogyne javanica</i> (Treub) Chitwood (Nematoda: Meloidogynidae), <i>Mesorhabditis</i> sp. (Nematoda: Rhabditidae)] | Number of nematodes noticeably reduced | Lab<br><br>Greenhouse:<br>Pots with sugarcane ( <i>Saccharum</i> sp. (Poaceae)) | [135] |

|  |  |  |                                                                                   |                                                                                                                                                                                                                              |                                                                                                                      |                                                                                       |       |
|--|--|--|-----------------------------------------------------------------------------------|------------------------------------------------------------------------------------------------------------------------------------------------------------------------------------------------------------------------------|----------------------------------------------------------------------------------------------------------------------|---------------------------------------------------------------------------------------|-------|
|  |  |  |                                                                                   | (C)<br>[ <i>Aphelenchus avenae</i><br>Bastian (Nematoda:<br>Aphelenchidae),<br><i>Meloidogyne javanica</i><br>(Treub) Chitwood<br>(Nematoda:<br>Meloidogynidae),<br><i>Mesorhabditis</i> sp.<br>(Nematoda:<br>Rhabditidae)]  | 1.5 ± 1.5 eggs/female/72<br>hours<br><br>Daily oviposition lower<br>than with <i>A. avenae</i>                       | Lab                                                                                   | [129] |
|  |  |  | <i>Rhabditis</i> sp. (Rhabditidae)<br>[FL]                                        | -                                                                                                                                                                                                                            | Reproduction occurred                                                                                                | Lab                                                                                   | [134] |
|  |  |  | <i>Tylenchorhynchus annulatus</i><br>(Cassidy) Golden<br>(Dolichodoridae)<br>[PP] | (M)<br>[ <i>Pratylenchus zeae</i><br>Graham (Nematoda:<br>Pratylenchidae) and<br>fungal-feeders and<br>bacterial-feeders<br>nematodes<br>(Nematoda:<br>predominantly<br>Rhabditidae,<br>Cephalobidae, and<br>Aphelenchidae)] | Reduction of the<br>population                                                                                       | Greenhouse:<br>Pots with sugarcane<br>( <i>Saccharum</i> sp.<br>(Poaceae))<br><br>Lab | [135] |
|  |  |  | <i>Tylenchulus semipenetrans</i><br>Cobb (Tylenchulidae)<br>[PP]                  | -                                                                                                                                                                                                                            | Colonized Citrus<br>nematode culture (one of<br>the dominant species)<br><br>Laboratory cultures on<br>nematode prey | Greenhouse:<br>Citrus nematode ( <i>T.</i><br><i>semipenetrans</i> ) box<br>cultures  | [117] |
|  |  |  | Unidentified nematode<br>[possibly FL]                                            | -                                                                                                                                                                                                                            | Reared from larva to adult                                                                                           | Lab?                                                                                  | [97]  |

|  |  |                                                                |                                                                                                                             |                                                                                                                                                                                                                                                                                          |                                                                                                                                                                                                                         |     |       |
|--|--|----------------------------------------------------------------|-----------------------------------------------------------------------------------------------------------------------------|------------------------------------------------------------------------------------------------------------------------------------------------------------------------------------------------------------------------------------------------------------------------------------------|-------------------------------------------------------------------------------------------------------------------------------------------------------------------------------------------------------------------------|-----|-------|
|  |  | <i>Protogamasellus minutus</i><br>Nasr                         | <i>Rhabditis</i> sp. (Rhabditidae)<br>[FL]                                                                                  | (C)<br>[ <i>Lepidocyrtinus incertus</i><br>Handschin<br>(Collembola:<br>Entomobryidae),<br><i>Rhizoglyphus robini</i><br>Claparede (Acari:<br>Sarcoptiformes:<br>Astigmatina:<br>Acaridae), <i>Tyrophagus</i><br><i>putrescentiae</i> (Schränk)<br>(Acari: Sarcoptiformes:<br>Acaridae)] | Devel. time = females: 11.7<br>± 1.09 days; male: 10.5 ±<br>1.12 days<br><br>10.4 eggs/female<br><br>Fecundity 4.8 and 5.4x<br>lower than with <i>T.</i><br><i>putrescentiae</i> and <i>R. robini</i> ,<br>respectively | Lab | [132] |
|  |  | <i>Protogamasellus</i> nr. <i>massulus</i><br>(Athias-Henriot) | <i>Radopholus similis</i> (Cobb)<br>Thorne (= <i>Radopholus</i><br><i>citrophilus</i> Huettel, Dickson<br>& Kaplan)<br>[PP] | -                                                                                                                                                                                                                                                                                        | Hatching success = 92 ± 8<br>%                                                                                                                                                                                          | Lab | [94]  |
|  |  | <i>Protogamasellus</i> n.sp.                                   | <i>Radopholus similis</i> (Cobb)<br>Thorne (= <i>Radopholus</i><br><i>citrophilus</i> Huettel, Dickson<br>& Kaplan)<br>[PP] | -                                                                                                                                                                                                                                                                                        | Devel. time = 18.3 ± 0.2<br>days<br>Hatching success = 98 ± 2<br>%                                                                                                                                                      | Lab | [94]  |

|  |  |                                                                                                                      |                                                            |                                                                                                                                                                                                                                                                                                                                                     |                                                                                                                                                                                                                                                 |                                                                      |       |
|--|--|----------------------------------------------------------------------------------------------------------------------|------------------------------------------------------------|-----------------------------------------------------------------------------------------------------------------------------------------------------------------------------------------------------------------------------------------------------------------------------------------------------------------------------------------------------|-------------------------------------------------------------------------------------------------------------------------------------------------------------------------------------------------------------------------------------------------|----------------------------------------------------------------------|-------|
|  |  | <i>Protogamasellus similis</i> Genis, Loots & Ryke (= <i>Protogamasellus primitivus similis</i> Genis, Loots & Ryke) | Unidentified nematode [FL]                                 | (C) [ <i>Aspergillus flavus</i> Link (Eurotiales: Aspergillaceae), <i>Neocosmospora solani</i> (Mart.) L.Lombard & Crous. (= <i>Fusarium solani</i> ) (Hypocreales: Nectriaceae), <i>Rhizoglyphus robini</i> Claparede (Acari: Sarcoptiformes: Astigmatina: Acaridae), <i>Tyrophagus putrescentiae</i> (Schrank) (Acari: Sarcoptiformes: Acaridae)] | Devel. time = females: 10.53 ± 0.7 days; male: 10.06 ± 0.4 days<br><br>15.71 ± 3.8 eggs/female<br><br>Fecundity 2.5 and 2.8x lower than with <i>T. putrescentiae</i> and <i>R. robini</i> , respectively, but 1.1 - 1.3x higher than with fungi | Lab                                                                  | [133] |
|  |  | <i>Protogamasellus</i> sp.                                                                                           | <i>Tylenchulus semipenetrans</i> Cobb (Tylenchulidae) [PP] | -                                                                                                                                                                                                                                                                                                                                                   | Colonized Citrus nematode culture (one of the dominant species)<br><br>Laboratory cultures on nematode prey                                                                                                                                     | Greenhouse: Citrus nematode ( <i>T. semipenetrans</i> ) box cultures | [117] |
|  |  | <i>Protogamasellus</i> sp. 2                                                                                         | <i>Rhabditis</i> sp. (Rhabditidae) [FL]                    | -                                                                                                                                                                                                                                                                                                                                                   | Reproduction occurred                                                                                                                                                                                                                           | Lab                                                                  | [134] |
|  |  | <i>Protogamasellus</i> sp. 3                                                                                         | <i>Rhabditis</i> sp. (Rhabditidae) [FL]                    | -                                                                                                                                                                                                                                                                                                                                                   | Reproduction occurred                                                                                                                                                                                                                           | Lab                                                                  | [134] |
|  |  | <i>Protogamasellus</i> sp. 4                                                                                         | <i>Rhabditis</i> sp. (Rhabditidae) [FL]                    | -                                                                                                                                                                                                                                                                                                                                                   | Reproduction occurred                                                                                                                                                                                                                           | Lab                                                                  | [134] |
|  |  | <i>Protogamasellus</i> sp. 5                                                                                         | <i>Rhabditis</i> sp. (Rhabditidae) [FL]                    | -                                                                                                                                                                                                                                                                                                                                                   | Reproduction occurred                                                                                                                                                                                                                           | Lab                                                                  | [134] |
|  |  | <i>Protogamasellus</i> sp. 6                                                                                         | <i>Rhabditis</i> sp. (Rhabditidae) [FL]                    | -                                                                                                                                                                                                                                                                                                                                                   | Reproduction occurred                                                                                                                                                                                                                           | Lab                                                                  | [134] |

|  |                |                                                                                     |                                                                                                           |                                                                                 |                                                                                                                                                                                                                         |                                                             |       |
|--|----------------|-------------------------------------------------------------------------------------|-----------------------------------------------------------------------------------------------------------|---------------------------------------------------------------------------------|-------------------------------------------------------------------------------------------------------------------------------------------------------------------------------------------------------------------------|-------------------------------------------------------------|-------|
|  |                | <i>Protogamasellus</i> sp. 7                                                        | <i>Rhabditis</i> sp. (Rhabditidae) [FL]                                                                   | -                                                                               | Reproduction occurred                                                                                                                                                                                                   | Lab                                                         | [134] |
|  |                | <i>Zerconopsis</i> sp. (= <i>Zerconopsis</i> n. sp. 1 in Walter and Lindquist 1995) | Mix of <i>Panagrellus silusiae</i> (de Man) (Panagrolaimidae) and <i>Rhabditis</i> sp. (Rhabditidae) [FL] | -                                                                               | -                                                                                                                                                                                                                       | Lab                                                         | [160] |
|  |                |                                                                                     | <i>Rhabditis</i> sp. (Rhabditidae) [FL]                                                                   | -                                                                               | Reproduction occurred                                                                                                                                                                                                   | Lab                                                         | [134] |
|  |                | <i>Zerconopsis</i> n. sp. 2                                                         | <i>Rhabditis</i> sp. (Rhabditidae) [FL]                                                                   | -                                                                               | Reproduction occurred                                                                                                                                                                                                   | Lab                                                         | [134] |
|  | Blattisociidae | <i>Arrhenoseius gloriosus</i> Walter & Lindquist                                    | <i>Panagrellus silusiae</i> (de Man) (Panagrolaimidae) [FL]                                               | -                                                                               | Reproduction occurred (colonies established)                                                                                                                                                                            | Lab                                                         | [248] |
|  |                |                                                                                     | Mix of <i>Panagrellus silusiae</i> (de Man) (Panagrolaimidae) and <i>Rhabditis</i> sp. (Rhabditidae) [FL] | -                                                                               | -                                                                                                                                                                                                                       | Lab                                                         | [160] |
|  |                | <i>Blattisocius dolichus</i> Ma                                                     | <i>Meloidogyne incognita</i> (Kofoed & White) Chitwood (Meloidogynidae) J2 [PP]                           | -                                                                               | Reduction of nematodes and root-knots and egg masses on the roots                                                                                                                                                       | Lab: Petri dishes and pots                                  | [124] |
|  |                |                                                                                     | <i>Radopholus similis</i> (Cobb) Thorne (Pratylenchidae) [PP]                                             | (C) [ <i>Caenorhabditis elegans</i> (Maupas) Dougherty (Nematoda: Rhabditidae)] | Devel. time = ~10 – 11 days<br><br><i>B. dolichus</i> preferred live <i>R. similis</i> over dead <i>R. similis</i> or live <i>C. elegans</i><br><br><i>B. dolichus</i> reduced the density of <i>R. similis</i> in pots | Lab: Pots with <i>Anthurium andraeanum</i> Linden (Araceae) | [165] |



|  |  |                                                                                                  |                                                                                                                                                                                           |   |                       |     |       |
|--|--|--------------------------------------------------------------------------------------------------|-------------------------------------------------------------------------------------------------------------------------------------------------------------------------------------------|---|-----------------------|-----|-------|
|  |  | <i>Cheiroseius borealis</i> (Berlese)<br>(= <i>Platyseius montanus</i> , <i>Sejus borealis</i> ) | Mix? of saprophagous<br>nematodes and <i>Globodera<br/>rostochiensis</i> (Wollenweber)<br>Skarbilovich (= <i>Heterodera<br/>rostochiensis</i> Wollenweber)<br>(Heteroderidae)<br>[FL, PP] | - | -                     | Lab | [172] |
|  |  |                                                                                                  | Unidentified nematode<br>[possibly FL]                                                                                                                                                    | - | -                     | Lab | [243] |
|  |  | <i>Cheiroseius</i> nr. <i>curtipes</i><br>(Halbert)                                              | <i>Rhabditis</i> sp. (Rhabditidae)<br>[FL]                                                                                                                                                | - | Reproduction occurred | Lab | [134] |
|  |  | <i>Cheiroseius</i> nr. <i>mutilus</i><br>(Berlese)                                               | <i>Rhabditis</i> sp. (Rhabditidae)<br>[FL]                                                                                                                                                | - | Reproduction occurred | Lab | [134] |
|  |  | <i>Cheiroseius</i> nr. <i>neborealis</i><br>(Evans & Hyatt)                                      | <i>Rhabditis</i> sp. (Rhabditidae)<br>[FL]                                                                                                                                                | - | Reproduction occurred | Lab | [134] |
|  |  | <i>Cheiroseius</i> nr. <i>jamaicenis</i><br>(Evans & Hyatt)                                      | <i>Rhabditis</i> sp. (Rhabditidae)<br>[FL]                                                                                                                                                | - | Reproduction occurred | Lab | [134] |
|  |  | <i>Cheiroseius</i> nr. <i>parbatensis</i><br>(Evans & Hyatt)                                     | <i>Rhabditis</i> sp. (Rhabditidae)<br>[FL]                                                                                                                                                | - | Reproduction occurred | Lab | [134] |
|  |  | <i>Cheiroseius</i> sp. 1                                                                         | <i>Rhabditis</i> sp. (Rhabditidae)<br>[FL]                                                                                                                                                | - | Reproduction occurred | Lab | [134] |
|  |  | <i>Cheiroseius</i> sp.                                                                           | Mix of <i>Panagrellus silusiae</i><br>(de Man)<br>(Panagrolaimidae) and<br><i>Rhabditis</i><br>sp. (Rhabditidae)<br>[FL]                                                                  | - | -                     | Lab | [160] |

|  |  |                                       |                                                                                                           |                                                                                                                                                                                                                             |                                                                                                                                                                                                                                                                                                                                                       |                    |       |
|--|--|---------------------------------------|-----------------------------------------------------------------------------------------------------------|-----------------------------------------------------------------------------------------------------------------------------------------------------------------------------------------------------------------------------|-------------------------------------------------------------------------------------------------------------------------------------------------------------------------------------------------------------------------------------------------------------------------------------------------------------------------------------------------------|--------------------|-------|
|  |  | <i>Lasioseius africanus</i> Nasr      | <i>Meloidogyne incognita</i> (Kofoed & White) Chitwood (Meloidogynidae) [PP]                              | (C) [ <i>Musca domestica</i> L. (Insecta: Diptera) larvae, <i>Rhizoglyphus robini</i> Claparede (Acari: Sarcoptiformes: Astigmatina: Acaridae), <i>Tyrophagus putrescentiae</i> (Schrank) (Acari: Sarcoptiformes) Acaridae] | Devel. time = $10.4 \pm 1.3$ (at $30^{\circ}\text{C}$ ) – $27.9 \pm 1.8$ (at $20^{\circ}\text{C}$ ).<br><br>Fecundity = 55.62 (at $20^{\circ}\text{C}$ ) – 85.07 (at $25^{\circ}\text{C}$ ) eggs/female<br><br>rm = 0.206 (at $20^{\circ}\text{C}$ ) – 0.562 (at $30^{\circ}\text{C}$ )<br><br>Fecundity 1.08 – 1.4x higher than with the other preys | Lab                | [161] |
|  |  | <i>Lasioseius berlesei</i> (Oudemans) | <i>Acrobeloides</i> sp. (Cephalobidae) [FL]                                                               | (C) [ <i>Cladosporium cladosporioides</i> (Fresen.) G.A. de Vries (Ascomycota: Cladosporiaceae), <i>Drechslera australiensis</i> Bugnic. (Ascomycota: Pleosporaceae)]                                                       | 2-4 eggs/female/day<br><br>Devel. time = ~ 1 week<br><br>Lower daily oviposition with <i>C. cladosporioides</i> , y <i>D. australiensis</i> (0.9 eggs/female/day)<br><br>Consumed ~ 16.7 nematodes                                                                                                                                                    | Lab                | [249] |
|  |  |                                       | <i>Rhabditis</i> sp. (Rhabditidae) [FL]                                                                   | -                                                                                                                                                                                                                           | Reproduction occurred                                                                                                                                                                                                                                                                                                                                 | Lab                | [134] |
|  |  | <i>Lasioseius boomsmai</i> Womersley  | Unidentified nematode [possible FL]                                                                       | -                                                                                                                                                                                                                           | -                                                                                                                                                                                                                                                                                                                                                     | Field: Observation | [250] |
|  |  |                                       | Mix of <i>Panagrellus silusiae</i> (de Man) (Panagrolaimidae) and <i>Rhabditis</i> sp. (Rhabditidae) [FL] | -                                                                                                                                                                                                                           | -                                                                                                                                                                                                                                                                                                                                                     | Lab                | [160] |

|  |  |                                                                           |                                                                               |                                                                                                                                                                                                                                                                                         |                                                                                                                                                                                                      |     |            |
|--|--|---------------------------------------------------------------------------|-------------------------------------------------------------------------------|-----------------------------------------------------------------------------------------------------------------------------------------------------------------------------------------------------------------------------------------------------------------------------------------|------------------------------------------------------------------------------------------------------------------------------------------------------------------------------------------------------|-----|------------|
|  |  |                                                                           | <i>Rhabditis</i> sp. (Rhabditidae) [FL]                                       | -                                                                                                                                                                                                                                                                                       | Reproduction occurred                                                                                                                                                                                | Lab | [134]      |
|  |  | <i>Lasioseius dentatus</i> (Fox) (= <i>Lasioseius scapulatus</i> Kennett) | <i>Acrobelloides</i> sp. (Cephalobidae) [FL]                                  | -                                                                                                                                                                                                                                                                                       | -                                                                                                                                                                                                    | Lab | [251,2 52] |
|  |  |                                                                           | <i>Allodiplogaster</i> sp. (= <i>Diplenteron</i> sp.) (Diplogastridae) [FL]   | -                                                                                                                                                                                                                                                                                       | -                                                                                                                                                                                                    | Lab | [251,2 52] |
|  |  |                                                                           | <i>Aphelenchus avenae</i> Bastian (Aphelenchidae) [FL]                        | -                                                                                                                                                                                                                                                                                       | ~ 23 eggs/female/6 days<br><br>70-98% nematode population reduction                                                                                                                                  | Lab | [251,2 52] |
|  |  |                                                                           | <i>Caenorhabditis</i> sp. (Rhabditidae) [FL]                                  | -                                                                                                                                                                                                                                                                                       | -                                                                                                                                                                                                    | Lab | [251,2 52] |
|  |  |                                                                           | <i>Meloidogyne javanica</i> (Treub) Chitwood (Meloidogynidae) egg masses [PP] | (C) [ <i>Penillium digitatum</i> (Pers.) Sacc. (Fungi: Eurotiales: Aspergillaceae), <i>Sancassania rodriguezi</i> (Samsinak) (= <i>Caloglyphus rodriguezi</i> Samsinak) (Acari: Sarcoptiformes: Acaridae), <i>Tyrophagus putrescentiae</i> (Schrank) (Acari: Sarcoptiformes: Acaridae)] | Devel. time = female: 12.8 ± 1.3 days; male 11.7 ± 1.4 days<br><br>$r_m = 0.25$<br><br>rm slightly higher with <i>S. rodriguezi</i> and <i>T. putrescentiae</i> , a similar with <i>P. digitatum</i> | Lab | [253]      |

|  |  |                                                                                           |                                                                                          |                                                                                                                                                                                                                                                                                               |                                                                                                                                                                                                                                                                   |                         |               |
|--|--|-------------------------------------------------------------------------------------------|------------------------------------------------------------------------------------------|-----------------------------------------------------------------------------------------------------------------------------------------------------------------------------------------------------------------------------------------------------------------------------------------------|-------------------------------------------------------------------------------------------------------------------------------------------------------------------------------------------------------------------------------------------------------------------|-------------------------|---------------|
|  |  |                                                                                           | <i>Meloidogyne incognita</i><br>(Kofoed & White)<br>Chitwood<br>(Meloidogynidae)<br>[PP] | -                                                                                                                                                                                                                                                                                             | <i>L. dentatus</i> consumed only<br>J2                                                                                                                                                                                                                            | Lab                     | [251,2<br>52] |
|  |  |                                                                                           | <i>Mononchus</i> sp.<br>(Mononchidae)<br>[FL]                                            | -                                                                                                                                                                                                                                                                                             | -                                                                                                                                                                                                                                                                 | Lab                     | [251,2<br>52] |
|  |  |                                                                                           | <i>Paraphelenchus</i> sp.<br>(Aphelenchidae)<br>[FL]                                     | -                                                                                                                                                                                                                                                                                             | -                                                                                                                                                                                                                                                                 | Lab                     | [251,2<br>52] |
|  |  |                                                                                           | <i>Rhabditis</i> sp. (Rhabditidae)<br>[FL]                                               | -                                                                                                                                                                                                                                                                                             | 5.7 ± 0.2 eggs/female/day<br>Devel. time = ~5-7 days                                                                                                                                                                                                              | Lab                     | [134]         |
|  |  |                                                                                           | <i>Seinura</i> sp.<br>(Aphelenchoididae)<br>[FL]                                         | -                                                                                                                                                                                                                                                                                             | -                                                                                                                                                                                                                                                                 | Lab                     | [251,2<br>52] |
|  |  | <i>Lasioseius floridensis</i> Berlese<br>(= <i>Lasioseius fimetorum</i> Karg<br>in [254]) | <i>Rhabditis</i> sp. (Rhabditidae)<br>[FL]                                               | -                                                                                                                                                                                                                                                                                             | Reproduction occurred                                                                                                                                                                                                                                             | Lab                     | [134]         |
|  |  |                                                                                           | <i>Rhabditella axei</i> (Cobbold)<br>(Rhabditidae)<br>[FL]                               | (C)<br>[ <i>Aspergillus flavus</i> Link<br>(Eurotiales:<br>Aspergillaceae),<br><i>Penicillium</i> sp.<br>(Eurotiales:<br>Aspergillaceae),<br><i>Tyrophagus<br/>putrescentiae</i> (Schrank)<br>(Acari: Sarcoptiformes:<br>Acaridae), pollen of<br><i>Typha</i><br>sp. (Plantae:<br>Typhaceae)] | Devel. time = 6.2 ± 0.6 days<br><br>5.0 ± 0.5 eggs/female/day<br>$r_m = 0.198 \pm 0.07$<br><br>Daily oviposition 3.1 to<br>>50x higher than with the<br>other preys.<br><br>Daily oviposition 4.5 –<br>6.25x and $r_m$ 1.6x higher<br>than with <i>P. latus</i> . | Lab                     | [162]         |
|  |  |                                                                                           | Unidentified nematode<br>[possibly FL]                                                   | -                                                                                                                                                                                                                                                                                             | -                                                                                                                                                                                                                                                                 | Field:<br>Observations? | [254]         |

|  |  |                                                |                                                                                                                                                                                      |                                                                                                                                                                          |                                                                                                                                                                                     |     |       |
|--|--|------------------------------------------------|--------------------------------------------------------------------------------------------------------------------------------------------------------------------------------------|--------------------------------------------------------------------------------------------------------------------------------------------------------------------------|-------------------------------------------------------------------------------------------------------------------------------------------------------------------------------------|-----|-------|
|  |  | <i>Lasioseius kinikinik</i> Walter & Lindquist | <i>Acrobeloides</i> sp. (Cephalobidae) [FL]                                                                                                                                          | (C)<br>[ <i>Cladosporium cladosporioides</i> (Fresen.) G.A. de Vries (Ascomycota: Cladosporiaceae), <i>Drechslera australiensis</i> Bugnic. (Ascomycota: Pleosporaceae)] | 1-3 eggs/female/day<br><br>Devel. time = ~ 10 days<br><br>No feeding of hyphae and spores of <i>C. cladosporioides</i> , y <i>D. australiensis</i><br><br>Consumed ~ 12.8 nematodes | Lab | [249] |
|  |  |                                                | <i>Rhabditis</i> sp. (Rhabditidae) [FL]                                                                                                                                              | -                                                                                                                                                                        | Reproduction occurred                                                                                                                                                               | Lab | [134] |
|  |  | <i>Lasioseius penicilliger</i> Berlese         | <i>Haemonchus contortus</i> (Rudolphi) L3 (Trichostrongylidae) [PP]                                                                                                                  | (C)<br>[ <i>Panagrellus redivivus</i> (Linnaeus) (Nematoda: Panagrolaimidae), <i>Rhabditis</i> sp. (Nematoda: Rhabditidae)]                                              | 80% of L3 of <i>H. contortus</i> were killed by the mites<br><br>Consumption 16% higher than consumption of <i>P. redivivus</i>                                                     | Lab | [255] |
|  |  |                                                | Mix of nematodes, mainly <i>Pratylenchus</i> (Pratylenchidae), <i>Paratylenchus</i> (Tylenchulidae), <i>Tylenchorhynchus</i> (Dolichodoridae), and saprophagous Tylenchidae [FL, PP] | -                                                                                                                                                                        | -                                                                                                                                                                                   | Lab | [139] |
|  |  |                                                |                                                                                                                                                                                      |                                                                                                                                                                          |                                                                                                                                                                                     |     |       |

|  |  |  |                                                                         |                                                                                                                                                                             |                                                                                                                                                    |                                  |       |
|--|--|--|-------------------------------------------------------------------------|-----------------------------------------------------------------------------------------------------------------------------------------------------------------------------|----------------------------------------------------------------------------------------------------------------------------------------------------|----------------------------------|-------|
|  |  |  | <i>Panagrellus redivivus</i><br>(Linnaeus)<br>(Panagrolaimidae)<br>[FL] | (C)<br>[ <i>Haemonchus contortus</i><br>(Rudolphi) L3<br>(Nematoda:<br>Trichostrongylida),<br><i>Rhabditis</i> sp.<br>(Nematoda:<br>Rhabditidae)]                           | 81% of L3 of <i>H. contortus</i><br>were killed<br>by the mites<br><br>Consumption 1% higher<br>than consumption of <i>H.</i><br><i>contortus</i>  | Lab                              | [255] |
|  |  |  | <i>Rhabditis</i> sp. (Rhabditidae)<br>[FL]                              | (C)<br>[ <i>Haemonchus contortus</i><br>(Rudolphi) L3<br>(Nematoda:<br>Trichostrongylida),<br><i>Panagrellus redivivus</i><br>(Linnaeus)<br>(Nematoda:<br>Panagrolaimidae)] | 64% of L3 of <i>H. contortus</i><br>were killed<br>by the mites<br><br>Consumption 16% higher<br>than consumption of <i>H.</i><br><i>contortus</i> | Lab                              | [255] |
|  |  |  | Unidentified nematode<br>[possibly FL]                                  | -                                                                                                                                                                           | -                                                                                                                                                  | Field:<br>Observations?          | [254] |
|  |  |  | <i>Tylenchorhynchus dubius</i><br>(Bütschli) (Dolichodoridae)<br>[PP]   | -                                                                                                                                                                           | Multiplication of mites<br>and reduction of<br>nematodes                                                                                           | Lab<br>Glasshouse: potted<br>pea | [138] |

|  |  |                                                                                          |                                                                                                           |                                                                                                                                                                                                                                                                         |                                                                                                                                                                                                                                          |     |       |
|--|--|------------------------------------------------------------------------------------------|-----------------------------------------------------------------------------------------------------------|-------------------------------------------------------------------------------------------------------------------------------------------------------------------------------------------------------------------------------------------------------------------------|------------------------------------------------------------------------------------------------------------------------------------------------------------------------------------------------------------------------------------------|-----|-------|
|  |  | <i>Lasioseius queenslandicus</i> (Womersley) (= <i>Lasioseius athiasae</i> Nawar & Nasr) | <i>Meloidogyne incognita</i> (Kofoed & White) Chitwood (Meloidogynidae) egg masses [PP]                   | (C)<br>[ <i>Rhizoglyphus robini</i> Claparede (Acari: Sarcoptiformes: Astigmatina: Acaridae) nymphs, <i>Tetranychus urticae</i> Koch (Acari: Trombidiformes: Tetranychidae) nymphs, <i>Tyrophagus putrescentiae</i> (Schränk) (Acari: Sarcoptiformes) Acaridae) nymphs] | Devel. time = $12.13 \pm 0.21$ days (female); $12.73 \pm 0.34$ days (male)<br><br>0.57 eggs/female/day<br><br>Daily oviposition lowest compared with other preys                                                                         | Lab | [164] |
|  |  |                                                                                          |                                                                                                           | (C)<br>[ <i>Aceria dioscoridis</i> (Soliman and Abou-Awad) (Acari: Trombidiformes: Eriophyidae, <i>Musca domestica</i> L. (Insecta: Diptera) eggs, <i>Tetranychus urticae</i> Koch (Acari: Trombidiformes: Tetranychidae) nymphs]                                       | Devel. time = female: $12.92 \pm 0.37$ days; male: $12.80 \pm 0.49$ days<br><br>20.03 eggs/female/day<br>$r_m = 0.065$<br>Fecundity: $596.09 \pm 57.14$ eggs/female<br><br>Fecundity and $r_m$ 3.3 lower than with <i>A. dioscoridis</i> | Lab | [163] |
|  |  |                                                                                          | Mix of <i>Panagrellus silusiae</i> (de Man) (Panagrolaimidae) and <i>Rhabditis</i> sp. (Rhabditidae) [FL] | -                                                                                                                                                                                                                                                                       | -                                                                                                                                                                                                                                        | Lab | [160] |
|  |  |                                                                                          | <i>Rhabditis</i> sp. (Rhabditidae) [FL]                                                                   | -                                                                                                                                                                                                                                                                       | Reproduction occurred                                                                                                                                                                                                                    | Lab | [134] |

|  |  |                                         |                                                                                          |                                                                                                                                                                                                                                                                                                                                                      |                                                                                                                                                                                                                                                                                                                                 |                                                                                           |       |
|--|--|-----------------------------------------|------------------------------------------------------------------------------------------|------------------------------------------------------------------------------------------------------------------------------------------------------------------------------------------------------------------------------------------------------------------------------------------------------------------------------------------------------|---------------------------------------------------------------------------------------------------------------------------------------------------------------------------------------------------------------------------------------------------------------------------------------------------------------------------------|-------------------------------------------------------------------------------------------|-------|
|  |  |                                         | Unidentified nematode<br>[FL]                                                            | (C)<br>[ <i>Aspergillus niger</i><br>Tiegh. (Ascomycota:<br>Aspergillaceae),<br><i>Fusarium oxysporum</i><br>Schltdl. (Ascomycota:<br>Nectriaceae),<br><i>Rhizoglyphus robini</i><br>Claparede (Acari:<br>Sarcoptiformes:<br>Astigmatina:<br>Acaridae), <i>Tyrophagus</i><br><i>putrescentiae</i> (Schrunk)<br>(Acari: Sarcoptiformes:<br>Acaridae)] | Devel. time = female: 7.39<br>± 0.49 days; male: 7.11 ±<br>0.93 days<br><br>1.12 eggs/female/day<br>Fecundity = 28.96 ± 4.3<br>eggs/female<br><br>Fecundity 1.8 – 2.5x higher<br>than with the fungi ( <i>A.</i><br><i>niger</i> , <i>F. oxysporum</i> ).<br>Fecundity higher with the<br>Acaridae mites than with<br>nematodes | Lab                                                                                       | [256] |
|  |  | <i>Lasioseius subterraneus</i><br>Chant | <i>Aphelenchus avenae</i> Bastian<br>(Aphelenchidae)<br>[FL]                             | (C)<br>[ <i>Meloidogyne javanica</i><br>(Treub) Chitwood<br>(Nematoda:<br>Meloidogynidae),<br><i>Mesorhabditis</i> sp.<br>(Nematoda:<br>Rhabditidae),<br><i>Pratylenchus zeae</i><br>Graham (Nematoda:<br>Pratylenchidae)]                                                                                                                           | 1.6 ± 1.5 eggs/female/72<br>hours<br><br>Daily oviposition lower<br>than with <i>M. javanica</i>                                                                                                                                                                                                                                | Lab                                                                                       | [129] |
|  |  |                                         | <i>Meloidogyne incognita</i><br>(Kofoid & White)<br>Chitwood<br>(Meloidogynidae)<br>[PP] | -                                                                                                                                                                                                                                                                                                                                                    | Colonized Root-knot<br>nematode culture (one of<br>the dominant species)<br><br>Laboratory cultures on<br>nematode prey                                                                                                                                                                                                         | Greenhouse:<br>Pot cultures of<br>Root-knot<br>nematode ( <i>M.</i><br><i>incognita</i> ) | [117] |
|  |  |                                         |                                                                                          | -                                                                                                                                                                                                                                                                                                                                                    | Colonization of pots, but<br>no population reduction of<br>nematodes was<br>demonstrated                                                                                                                                                                                                                                        | Glasshouse:<br>Pots                                                                       | [134] |



|  |  |  |                                                                               |                                                                                                                                                                                  |                                                                                                        |     |       |
|--|--|--|-------------------------------------------------------------------------------|----------------------------------------------------------------------------------------------------------------------------------------------------------------------------------|--------------------------------------------------------------------------------------------------------|-----|-------|
|  |  |  | <i>Meloidogyne javanica</i> (Treub) Chitwood (Meloidogynidae) egg masses [PP] | (C) [Aphelenchus avenae Bastian (Nematoda: Aphelenchidae), Mesorhabditis sp. (Nematoda: Rhabditidae), Pratylenchus zae Graham (Nematoda: Pratylenchidae)]                        | 3 ± 2.5 eggs/female/72 hours<br><br>Daily oviposition 1.07 – 1.9x higher than with the other nematodes | Lab | [129] |
|  |  |  | <i>Mesorhabditis</i> sp. (Rhabditidae) [FL]                                   | (C) [Aphelenchus avenae Bastian (Nematoda: Aphelenchidae), Meloidogyne javanica (Treub) Chitwood (Nematoda: Meloidogynidae), Pratylenchus zae Graham (Nematoda: Pratylenchidae)] | 2.8 ± 2.3 eggs/female/72 hours<br>Reared<br><br>Daily oviposition lower than with <i>M. javanica</i>   | Lab | [129] |
|  |  |  | <i>Pratylenchus zae</i> Graham (Pratylenchidae) [PP]                          | (C) [Aphelenchus avenae Bastian (Nematoda: Aphelenchidae), Meloidogyne javanica (Treub) Chitwood (Nematoda: Meloidogynidae), Mesorhabditis sp. (Nematoda: Rhabditidae)]          | 2.5 ± 3 eggs/female/72 hours<br><br>Daily oviposition lower than with <i>M. javanica</i>               | Lab | [129] |
|  |  |  | <i>Rhabditis</i> sp. (Rhabditidae) [FL]                                       | -                                                                                                                                                                                | 9.2 ± 0.5 eggs/female/day<br>Devel. time = ~6-7 days                                                   | Lab | [134] |

|  |  |                                              |                                                                                                                                                                                                                              |                                                                                                                                                                                                      |                                                                                                                               |     |       |
|--|--|----------------------------------------------|------------------------------------------------------------------------------------------------------------------------------------------------------------------------------------------------------------------------------|------------------------------------------------------------------------------------------------------------------------------------------------------------------------------------------------------|-------------------------------------------------------------------------------------------------------------------------------|-----|-------|
|  |  | <i>Lasioseius thermophilus</i><br>Willmann   | <i>Ditylenchus myceliophagus</i><br>Goodey (Anguinidae)<br>[FL]                                                                                                                                                              | -                                                                                                                                                                                                    | -                                                                                                                             | Lab | [257] |
|  |  | <i>Lasioseius youcefi</i> Athias-<br>Henriot | <i>Acrobeloides</i> sp.<br>(Cephalobidae)<br>[FL]                                                                                                                                                                            | (C)<br>[ <i>Cladosporium</i><br><i>cladosporioides</i> (Fresen.)<br>G.A. de Vries<br>(Ascomycota:<br>Cladosporiaceae),<br><i>Drechslera australiensis</i><br>Bugnic. (Ascomycota:<br>Pleosporaceae)] | Devel. time = ~ 1 week<br><br>Lower daily oviposition<br>with <i>C. cladosporioides</i> , y <i>D.</i><br><i>australiensis</i> | Lab | [249] |
|  |  |                                              | Mix of <i>Acrobeloides</i> spp.<br>(Cephalobidae),<br><i>Aphelenchoides</i> sp.<br>(Aphelenchoididae), and<br><i>Aphelenchus avenae</i> Bastian<br>(Aphelenchidae),<br><i>Panagrolaimus</i> sp.<br>(Panagrolaimidae)<br>[FL] | -                                                                                                                                                                                                    | Reared                                                                                                                        | Lab | [7]   |
|  |  |                                              | <i>Rhabditis</i> sp. (Rhabditidae)<br>[FL]                                                                                                                                                                                   | -                                                                                                                                                                                                    | Reproduction occurred                                                                                                         | Lab | [134] |
|  |  | <i>Lasioseius</i> n. sp. c                   | <i>Rhabditis</i> sp. (Rhabditidae)<br>[FL]                                                                                                                                                                                   | -                                                                                                                                                                                                    | Reproduction occurred                                                                                                         | Lab | [134] |
|  |  | <i>Lasioseius</i> n. sp. q                   | <i>Rhabditis</i> sp. (Rhabditidae)<br>[FL]                                                                                                                                                                                   | -                                                                                                                                                                                                    | Reproduction occurred                                                                                                         | Lab | [134] |
|  |  | <i>Lasioseius</i> n. sp. 3                   | <i>Rhabditis</i> sp. (Rhabditidae)<br>[FL]                                                                                                                                                                                   | -                                                                                                                                                                                                    | Reproduction occurred                                                                                                         | Lab | [134] |

|  |                |                                                                              |                                                                                                                                                                                                      |    |        |     |                                                                           |
|--|----------------|------------------------------------------------------------------------------|------------------------------------------------------------------------------------------------------------------------------------------------------------------------------------------------------|----|--------|-----|---------------------------------------------------------------------------|
|  |                | <i>Lasioseius</i> sp. 2                                                      | Mix of <i>Acrobeloides</i> spp. (Cephalobidae), <i>Aphelenchoides</i> sp. (Aphelenchoididae), and <i>Aphelenchus avenae</i> Bastian (Aphelenchidae), <i>Panagrolaimus</i> sp. (Panagrolaimidae) [FL] | -  | Reared | Lab | [7]                                                                       |
|  | Digamasellidae | <i>Dendrolaelaps comatus</i> Hirschmann                                      | <i>Rhabditis</i> sp. (Rhabditidae), <i>Ditylenchus</i> sp. (Anguinidae) [FL]                                                                                                                         | -  | -      | Lab | [241,242] cited by [258]                                                  |
|  |                | <i>Dendrolaelaps fallax</i> (Leitner) (= <i>Digamasellus fallax</i> Leitner) | Unidentified nematode [possibly FL]                                                                                                                                                                  | -  | -      | Lab | [241,242]                                                                 |
|  |                |                                                                              | Unidentified nematode (may be the same reported before) [possibly FL]                                                                                                                                | -  | -      | Lab | [259]                                                                     |
|  |                | <i>Dendrolaelaps fukikoeae</i> Ishikawa                                      | pinewood nematodes [apparently <i>Bursaphelenchus xylophilus</i> (Steiner & Buhrer) (Aphelenchoididae) [PP]                                                                                          | NA | NA     | Lab | Enda and Tamura (1977), Enda and Tamura (1980) <sup>vi</sup> cited by [8] |

|  |  |                                             |                                                                                                                                                                       |   |                                                     |           |                                               |
|--|--|---------------------------------------------|-----------------------------------------------------------------------------------------------------------------------------------------------------------------------|---|-----------------------------------------------------|-----------|-----------------------------------------------|
|  |  | <i>Dendrolaelaps neodisetus</i> (Hurlbutt)  | <i>Contortylenchus brevicomi</i> (Massey) Rühm (Allantonematidae) [AP]                                                                                                | - | -                                                   | Lab Field | [260]<br>vii                                  |
|  |  |                                             | Unidentified nematode [possibly FL]                                                                                                                                   | - | -                                                   | Lab       | [244]                                         |
|  |  | <i>Dendrolaelaps</i> nr. <i>procornutus</i> | <i>Acrobelloides</i> sp. (Cephalobidae) [FL]                                                                                                                          | - | 4.2 eggs/female/day<br>Devel. time = 8.3 ± 0.2 days | Lab       | [59]                                          |
|  |  | <i>Dendrolaelaps rasmii</i> Nasr and Mersal | <i>Meloidogyne javanica</i> (Treub) Chitwood (Meloidogynidae) [PP]                                                                                                    | - | -                                                   | Lab       | Abou -El- Soud and Shoeib (2000) cited by [8] |
|  |  | <i>Dendrolaelaps rectus</i> Karg            | Mix? of saprophagous nematodes and <i>Globodera rostochiensis</i> (Wollenweber) Skarbilovich (= <i>Heterodera rostochiensis</i> Wollenweber) (Heteroderidae) [FL, PP] | - | -                                                   | Lab       | [172]                                         |

|  |  |                                                    |                                                                                                                                                                       |                                                                                                                                           |                                                               |                     |                    |
|--|--|----------------------------------------------------|-----------------------------------------------------------------------------------------------------------------------------------------------------------------------|-------------------------------------------------------------------------------------------------------------------------------------------|---------------------------------------------------------------|---------------------|--------------------|
|  |  |                                                    | Mix? of saprophagous nematodes and <i>Globodera rostochiensis</i> (Wollenweber) Skarbilovich (= <i>Heterodera rostochiensis</i> Wollenweber) (Heteroderidae) [FL, PP] | (C) [Juvenile Oribatida (Acari: Sarcoptiformes), unidentified Collembola, unidentified Acaridae (=Tyroglyphidae) (Acari: Sarcoptiformes)] | Prey eaten preferentially                                     | Lab                 | [145]              |
|  |  |                                                    | Unidentified nematode [possibly FL]                                                                                                                                   | -                                                                                                                                         | -                                                             | Lab                 | [243]              |
|  |  | <i>Dendroseius reticulatus</i> (Sheals)            | <i>Rhabditis</i> (Rhabditidae) [FL]                                                                                                                                   | -                                                                                                                                         | Reproduction occurred                                         | Lab                 | [170]              |
|  |  | <i>Dendrolaelaps</i> nr. <i>strenzkei</i>          | <i>Acrobeloides</i> sp. (Cephalobidae) [FL]                                                                                                                           | -                                                                                                                                         | 3.9 eggs//female/day<br>Devel. time = 8.7 ± 0.2 days          | Lab                 | [59]               |
|  |  | <i>Dendrolaelaps</i> nr. <i>latior</i>             | <i>Acrobeloides</i> sp. (Cephalobidae) [FL]                                                                                                                           | -                                                                                                                                         | Devel. time = 9.0 ± 0.2 days                                  | Lab                 | [59]               |
|  |  |                                                    | <i>Meloidogyne javanica</i> (Treub) Chitwood (Meloidogynidae) [PP]                                                                                                    | -                                                                                                                                         | -                                                             | Lab                 | [261] cited by [8] |
|  |  | <i>Dendrolaelaps</i> sp.                           | <i>Rhabditolaimus</i> sp. (= <i>Cylindrocorpus</i> sp.) (Diplogastridae) [FL]                                                                                         | -                                                                                                                                         | -                                                             | Lab                 | [262] viii         |
|  |  | <i>Dendrolaelaps</i> <i>zwoelferi</i> Hirschmann   | <i>Acrobeloides</i> sp. (Cephalobidae) [FL]                                                                                                                           | -                                                                                                                                         | 4.7 eggs/female/day<br>Devel. time = 8.6 ± 0.1 days           | Lab                 | [59]               |
|  |  | <i>Dendrolaelaps</i> <i>strenzkei</i> (Hirschmann) | <i>Globodera rostochiensis</i> (Wollenweber) Skarbilovich (= <i>Heterodera</i>                                                                                        | -                                                                                                                                         | 1.5-fold in a field contaminated with <i>G. rostochiensis</i> | Field: Observations | [145]              |

|  |  |                                                                                                         |                                                                                                                                                                       |    |                                                                           |                        |                                         |
|--|--|---------------------------------------------------------------------------------------------------------|-----------------------------------------------------------------------------------------------------------------------------------------------------------------------|----|---------------------------------------------------------------------------|------------------------|-----------------------------------------|
|  |  |                                                                                                         | <i>rostochiensis</i> Wollenweber)<br>(Heteroderidae)<br>[PP]                                                                                                          | -  | 25-fold in a field<br>contaminated with <i>G.</i><br><i>rostochiensis</i> | Field:<br>Observations | [103]                                   |
|  |  | <i>Digamasellus</i> sp.                                                                                 | <i>Cephalobus</i> sp.<br>(Cephalobidae)<br>[FL]                                                                                                                       | -  | -                                                                         | Lab                    | [115]                                   |
|  |  | <i>Insectolaelaps quadrisetus</i><br>(Berlese) (= <i>Dendrolaelaps</i><br><i>quadrisetus</i> (Berlese)) | Unidentified nematodes<br>presumably belonging to<br><i>Pelodera</i> (Rhabditidae) FL,<br><i>Contortylenchus</i><br>(Allantonematidae),<br>Diplogastridae<br>[FL, AP] | -  | -                                                                         | Lab                    | [263]<br>ix                             |
|  |  |                                                                                                         | <i>Rhabditis</i> sp. (Rhabditidae),<br><i>Ditylenchus</i> sp.<br>(Anguinidae)<br>[FL]                                                                                 | -  | -                                                                         | Lab                    | [241,2<br>42]<br>cited<br>by<br>[258]   |
|  |  |                                                                                                         | Unidentified nematodes<br>associated to <i>Ips</i><br><i>typographus</i> (L.) (Insecta:<br>Coleoptera)<br>[Possibly FL and AP]                                        | -  | -                                                                         | Lab                    | [264] <sup>x</sup>                      |
|  |  |                                                                                                         | Unidentified nematode<br>[possibly FL]                                                                                                                                | -  | -                                                                         | Lab                    | [244]<br>xi                             |
|  |  | <i>Multidendrolaelaps</i><br><i>unispinatus</i> (Ishikawa)                                              | pinewood nematodes<br>[apparently<br><i>Bursaphelenchus xylophilus</i><br>(Steiner & Buhrer)<br>(Aphelenchoididae)<br>[PP]                                            | NA | NA                                                                        | Lab                    | [265,2<br>66]<br>xii<br>cited<br>by [8] |

|  |             |                                              |                                                                                              |                                                                                                                                                                                                  |                                                                                                                               |     |       |
|--|-------------|----------------------------------------------|----------------------------------------------------------------------------------------------|--------------------------------------------------------------------------------------------------------------------------------------------------------------------------------------------------|-------------------------------------------------------------------------------------------------------------------------------|-----|-------|
|  | Eviphididae | <i>Alliphis halleri</i> (G. & R. Canestrini) | <i>Globodera rostochiensis</i> (Wollenweber) Skarbilovich (Heteroderidae) [PP]               | (C)<br>[ <i>Heligmasomoides polygyrus</i> (Dujardin) (=Nematospiroides dubius) (Nematoda: Heligosomatidae), <i>Pelodera strongyloides</i> (Scheider) (Nematoda: Rhabditidae)]                    | Devel. time = 17.1 days<br><br>Fecundity = 10 – 110 eggs/female (as with <i>H. polygyrus</i> and <i>P. strongyloides</i> )    | Lab | [146] |
|  |             |                                              | <i>Heligmasomoides polygyrus</i> (Dujardin) (=Nematospiroides dubius) (Heligosomatidae) [AP] | -                                                                                                                                                                                                | Reproduction occurred                                                                                                         | Lab | [170] |
|  |             |                                              |                                                                                              | (C)<br>[ <i>Globodera rostochiensis</i> (Wollenweber) Skarbilovich (Nematoda: Heteroderidae), <i>Pelodera strongyloides</i> (Scheider) (Nematoda: Rhabditidae)]                                  | Devel. time = 9.4 days<br><br>Fecundity = 10 – 110 eggs/female (as with <i>G. rostochiensis</i> and <i>P. strongyloides</i> ) | Lab | [146] |
|  |             |                                              | <i>Pelodera strongyloides</i> (Scheider) (Rhabditidae) [FL]                                  | -                                                                                                                                                                                                | Reproduction occurred                                                                                                         | Lab | [170] |
|  |             |                                              |                                                                                              | (C)<br>[ <i>Globodera rostochiensis</i> (Wollenweber) Skarbilovich (Nematoda: Heteroderidae), <i>Heligmasomoides polygyrus</i> (Dujardin) (=Nematospiroides dubius) (Nematoda: Heligosomatidae)] | Devel. time = 9.0 days<br><br>Fecundity = 10 – 110 eggs/female (as with <i>H. polygyrus</i> and <i>P. strongyloides</i> )     | Lab | [146] |

|  |                                                                                                 |                                                                                                                                                                                                                                                                                   |   |                                                             |                               |       |
|--|-------------------------------------------------------------------------------------------------|-----------------------------------------------------------------------------------------------------------------------------------------------------------------------------------------------------------------------------------------------------------------------------------|---|-------------------------------------------------------------|-------------------------------|-------|
|  | <i>Alliphis</i> cf. <i>halleri</i> (G. & R. Canestrini) (= <i>Alliphis</i> nr. <i>halleri</i> ) | Mix of <i>Acrobeloides</i> spp. (Cephalobidae), <i>Aphelenchoides</i> sp. (Aphelenchoididae), and <i>Aphelenchus avenae</i> Bastian (Aphelenchidae), <i>Panagrolaimus</i> sp. (Panagrolaimidae) [FL]                                                                              | - | Reared                                                      | Lab                           | [7]   |
|  |                                                                                                 | Mix of <i>Panagrolaimus</i> sp. (Panagrolaimidae), <i>Acrobeloides nanus</i> (de Man) Anderson (= <i>Cephalobus nanus</i> ) and <i>Acrobeloides</i> spp. (Cephalobidae), <i>Aphelenchoides</i> sp. (Aphelenchoididae), and <i>Aphelenchus avenae</i> Bastian (Aphelenchidae) [FL] | - | Reared from larva to adult                                  | Lab                           | [6]   |
|  |                                                                                                 | Unidentified nematode [possibly FL]                                                                                                                                                                                                                                               | - | Reared from larva to adult                                  | Lab?                          | [97]  |
|  | <i>Alliphis siculus</i> (Oudemans)                                                              | Mix? of saprophagous nematodes and <i>Globodera rostochiensis</i> (Wollenweber) Skarbilovich (= <i>Heterodera rostochiensis</i> Wollenweber) (Heteroderidae) [FL, PP]                                                                                                             | - | 4-fold in a field contaminated with <i>G. rostochiensis</i> | Lab<br><br>Field: Observation | [172] |



|  |  |                         |                                                                                                                                                                                                      |                                                                                                                                           |                                                                                              |                     |       |
|--|--|-------------------------|------------------------------------------------------------------------------------------------------------------------------------------------------------------------------------------------------|-------------------------------------------------------------------------------------------------------------------------------------------|----------------------------------------------------------------------------------------------|---------------------|-------|
|  |  |                         | Mix? of saprophagous nematodes and <i>Globodera rostochiensis</i> (Wollenweber) Skarbilovich (= <i>Heterodera rostochiensis</i> Wollenweber) (Heteroderidae) [FL, PP]                                | (C) [Juvenile Oribatida (Acari: Sarcoptiformes), unidentified Collembola, unidentified Acaridae (=Tyroglyphidae) (Acari: Sarcoptiformes)] | Prey eaten preferentially<br><br>4-fold in a field contaminated with <i>G. rostochiensis</i> | Lab                 | [145] |
|  |  |                         | Unidentified nematode [possibly FL]                                                                                                                                                                  | -                                                                                                                                         | -                                                                                            | Lab                 | [243] |
|  |  |                         | Unidentified nematode [possibly FL]                                                                                                                                                                  | -                                                                                                                                         | -                                                                                            | Field: Observations | [254] |
|  |  |                         | Unidentified nematode [possibly FL]                                                                                                                                                                  | (C) [unidentified Collembola, unidentified Acaridae (Acari: Sarcoptiformes)]                                                              | Addition of nematodes increased the population more than with other prey                     | Lab                 | [173] |
|  |  |                         | <i>Globodera</i> sp. [PP]                                                                                                                                                                            | -                                                                                                                                         | -                                                                                            | Lab                 | [258] |
|  |  | <i>Crassicheles</i> sp. | Mix of <i>Acrobeloides</i> spp. (Cephalobidae), <i>Aphelenchoides</i> sp. (Aphelenchoididae), and <i>Aphelenchus avenae</i> Bastian (Aphelenchidae), <i>Panagrolaimus</i> sp. (Panagrolaimidae) [FL] | -                                                                                                                                         | Reared                                                                                       | Lab                 | [7]   |

|  |                |                                         |                                                                                                                                                                                                                                                                                   |   |                                                    |      |       |
|--|----------------|-----------------------------------------|-----------------------------------------------------------------------------------------------------------------------------------------------------------------------------------------------------------------------------------------------------------------------------------|---|----------------------------------------------------|------|-------|
|  |                | <i>Eviphis</i> sp.                      | Mix of <i>Acrobeloides</i> spp. (Cephalobidae), <i>Aphelenchoides</i> sp. (Aphelenchoididae), and <i>Aphelenchus avenae</i> Bastian (Aphelenchidae), <i>Panagrolaimus</i> sp. (Panagrolaimidae) [FL]                                                                              | - | -                                                  | Lab  | [7]   |
|  |                |                                         | Mix of <i>Panagrolaimus</i> sp. (Panagrolaimidae), <i>Acrobeloides nanus</i> (de Man) Anderson (= <i>Cephalobus nanus</i> ) and <i>Acrobeloides</i> spp. (Cephalobidae), <i>Aphelenchoides</i> sp. (Aphelenchoididae), and <i>Aphelenchus avenae</i> Bastian (Aphelenchidae) [FL] | - | -                                                  | Lab  | [6]   |
|  |                |                                         | Unidentified nematode [possibly FL]                                                                                                                                                                                                                                               | - | Reared from larva to adult                         | Lab? | [97]  |
|  |                | <i>Copriphes</i> sp.                    | <i>Haematozoon subulatum</i> Leisering (= <i>Rhitis inermiformis</i> (Osche, 1952) Andrassy, 1983) (Rhabditidae) [FL]                                                                                                                                                             | - | Reared from larva to adult. Reproduction occurred. | Lab  | [171] |
|  |                | <i>Crassicheles</i> sp.                 | Unidentified nematode [possibly FL]                                                                                                                                                                                                                                               | - | Reared from larva to adult                         | Lab? | [97]  |
|  | Heatherellidae | <i>Heatherella acanthocharis</i> Walter | Unidentified nematode [possibly FL]                                                                                                                                                                                                                                               | - | -                                                  | Lab  | [267] |

|  |            |                                        |                                                                                                           |                                                                                                                                                                                                                                                                        |                                                                                                                                                          |     |       |
|--|------------|----------------------------------------|-----------------------------------------------------------------------------------------------------------|------------------------------------------------------------------------------------------------------------------------------------------------------------------------------------------------------------------------------------------------------------------------|----------------------------------------------------------------------------------------------------------------------------------------------------------|-----|-------|
|  |            |                                        | Mix of <i>Panagrellus silusiae</i> (de Man) (Panagrolaimidae) and <i>Rhabditis</i> sp. (Rhabditidae) [FL] | -                                                                                                                                                                                                                                                                      | -                                                                                                                                                        | Lab | [160] |
|  |            | <i>Heatherella callimauros</i> Walter  | Unidentified nematode [possibly FL]                                                                       | -                                                                                                                                                                                                                                                                      | -                                                                                                                                                        | Lab | [267] |
|  |            |                                        | Mix of <i>Panagrellus silusiae</i> (de Man) (Panagrolaimidae) and <i>Rhabditis</i> sp. (Rhabditidae) [FL] | -                                                                                                                                                                                                                                                                      | -                                                                                                                                                        | Lab | [160] |
|  | Laelapidae | <i>Androlaelaps laertes</i> (Domrow)   | Mix of <i>Panagrellus silusiae</i> (de Man) (Panagrolaimidae) and <i>Rhabditis</i> sp. (Rhabditidae) [FL] | -                                                                                                                                                                                                                                                                      | -                                                                                                                                                        | Lab | [160] |
|  |            | <i>Cosmolaelaps claviger</i> (Berlese) | <i>Rhabditis</i> sp. (Rhabditidae) [FL]                                                                   | (C)<br>[ <i>Musca domestica</i> L. (Insecta: Diptera: Tachinidae) eggs and larvae, <i>Rhizoglyphus echinopus</i> (Fumouze & Robin) (Acari: Sarcoptiformes: Acaridae), <i>Tetranychus urticae</i> Koch (Acari: Trombidiformes: Tetranychidae), unidentified Collembola] | 0.31 eggs/female/day<br><br>Fecundity: 4.7 eggs/female<br><br>Fecundity 1.5x higher than with Collembola, but 1.3 – 2.2x lower than with the other preys | Lab | [142] |

|  |  |                                                                                                         |                                                                               |   |   |     |       |
|--|--|---------------------------------------------------------------------------------------------------------|-------------------------------------------------------------------------------|---|---|-----|-------|
|  |  | <i>Cosmolaelaps indicus</i><br>Bhattacharyya (= <i>Hypoaspis</i><br><i>calcuttaensis</i> Bhattacharyya) | <i>Acrobeles</i> sp.<br>(Cephalobidae)<br>[FL]                                | - | - | Lab | [137] |
|  |  |                                                                                                         | <i>Acrobeloides</i> sp.<br>(Cephalobidae)<br>[FL]                             | - | - | Lab | [137] |
|  |  |                                                                                                         | <i>Anguina tritici</i> (Steinbuch)<br>(Anguinidae) [PP]                       | - | - | Lab | [137] |
|  |  |                                                                                                         | <i>Aphelenchoides</i> sp.<br>(Aphelenchoididae)<br>[FL]                       | - | - | Lab | [137] |
|  |  |                                                                                                         | <i>Aporcelaimellus nivalis</i><br>(Altherr) Heyns<br>(Aporcelaimidae)<br>[FL] | - | - | Lab | [137] |
|  |  |                                                                                                         | <i>Aquatides thornei</i><br>(Schneider) Heyns<br>(Nygolaimidae)<br>[FL]       | - | - | Lab | [137] |
|  |  |                                                                                                         | <i>Basiria</i> sp. (Tylenchidae)<br>[PP]                                      | - | - | Lab | [137] |
|  |  |                                                                                                         | <i>Cephalobus</i> sp.<br>(Cephalobidae)<br>[FL]                               | - | - | Lab | [137] |
|  |  |                                                                                                         | <i>Chiloplacus symmetricus</i><br>(Thorne) Thorne<br>(Cephalobidae)<br>[FL]   | - | - | Lab | [137] |
|  |  |                                                                                                         | <i>Discolaimus silvicolus</i> Sauer<br>& Annels<br>(Qudsianematidae)<br>[FL]  | - | - | Lab | [137] |
|  |  |                                                                                                         | <i>Dorylaimus stagnalis</i><br>Dujardin (Dorylaimidae)<br>[FL]                | - | - | Lab | [137] |

|  |  |  |                                                                                                     |   |   |     |       |
|--|--|--|-----------------------------------------------------------------------------------------------------|---|---|-----|-------|
|  |  |  | <i>Helicotylenchus indicus</i><br>Siddiqi (Hoplolaimidae)<br>[PP]                                   | - | - | Lab | [137] |
|  |  |  | <i>Hemicriconemoides mangiferae</i> Siddiqi<br>(Criconematidae)<br>[PP]                             | - | - | Lab | [137] |
|  |  |  | <i>Hermicycliophora</i> sp. (= <i>Hermicycliophora dhirendri</i> )<br>(Hermicycliophoridae)<br>[PP] | - | - | Lab | [137] |
|  |  |  | <i>Heterodera avenae</i><br>Wollenweber<br>(Heteroderidae) eggs<br>[PP]                             | - | - | Lab | [109] |
|  |  |  | <i>Heterodera mothi</i> Khan & Husain (Heteroderidae)<br>[PP]                                       | - | - | Lab | [137] |
|  |  |  | <i>Hirschmanniella oryzae</i> (van Breda de Haan) Luc & Goodey (Pratylenchidae)<br>[PP]             | - | - | Lab | [137] |
|  |  |  | <i>Hoplolaimus indicus</i> Sher<br>(Hoplolaimidae)<br>[PP]                                          | - | - | Lab | [137] |
|  |  |  | <i>Longidorus</i> sp.<br>(Longidoridae)<br>[PP]                                                     | - | - | Lab | [137] |
|  |  |  | <i>Meloidogyne incognita</i><br>(Kofoed & White)<br>Chitwood<br>(Meloidogynidae) J2<br>[PP]         | - | - | Lab | [137] |

|  |  |  |                                                                                                         |   |   |     |       |
|--|--|--|---------------------------------------------------------------------------------------------------------|---|---|-----|-------|
|  |  |  | <i>Meloidogyne javanica</i><br>(Treub) Chitwood<br>(Meloidogynidae) eggs<br>and J2<br>[PP]              | - | - | Lab | [109] |
|  |  |  | <i>Mesorhabditis</i> sp.<br>(Rhabditidae)<br>[FL]                                                       | - | - | Lab | [137] |
|  |  |  | <i>Mononchoides fortidens</i><br>(Schuurmans Stekhoven)<br>Taylor & Hechler<br>(Diplogastridae)<br>[FL] | - | - | Lab | [137] |
|  |  |  | <i>Mononchoides longicaudatus</i><br>(Khera) Andrassy<br>(Diplogastridae)<br>[FL]                       | - | - | Lab | [137] |
|  |  |  | <i>Mononchus aquaticus</i><br>Coetzee (Mononchidae)<br>[FL]                                             | - | - | Lab | [137] |
|  |  |  | <i>Mylonchulus dentatus</i><br>Jairajpuri (Mylonchulidae)<br>[FL]                                       | - | - | Lab | [137] |
|  |  |  | <i>Paralongidorus citri</i><br>(Siddiqi) (Longidoridae)<br>[PP]                                         | - | - | Lab | [137] |
|  |  |  | <i>Paratrichodorus</i> sp.<br>(Trichodoridae)<br>[PP]                                                   | - | - | Lab | [137] |
|  |  |  | <i>Rhabditis</i> sp. (Rhabditidae)<br>[FL]                                                              | - | - | Lab | [137] |
|  |  |  | <i>Scutellonema</i> sp.<br>(Hoplolaimidae)<br>[PP]                                                      | - | - | Lab | [137] |
|  |  |  | <i>Tobrilus</i> sp. (Tobrilidae)<br>[FL]                                                                | - | - | Lab | [137] |

|  |  |                                                                |                                                                                                                                                                                                      |                                                                                                                                                                               |                                                                                                                                                                                                                  |     |                 |
|--|--|----------------------------------------------------------------|------------------------------------------------------------------------------------------------------------------------------------------------------------------------------------------------------|-------------------------------------------------------------------------------------------------------------------------------------------------------------------------------|------------------------------------------------------------------------------------------------------------------------------------------------------------------------------------------------------------------|-----|-----------------|
|  |  |                                                                | <i>Tylenchorhynchus mashhoodi</i> Siddiqi & Basir (Dolichodoridae) [PP]                                                                                                                              | -                                                                                                                                                                             | -                                                                                                                                                                                                                | Lab | [137]           |
|  |  |                                                                | <i>Xiphinema basiri</i> Siddiqi (Longidoridae) [PP]                                                                                                                                                  | -                                                                                                                                                                             | -                                                                                                                                                                                                                | Lab | (Bilgrami 1997) |
|  |  | <i>Cosmolaelaps jaboticabalensis</i> Moreira, Klompen & Moraes | <i>Protorhabditis</i> sp. (Rhabditidae) [FL]                                                                                                                                                         | (C) [Frankliniella occidentalis (Pergande) (Insecta: Thysanoptera: Thripidae) pupae and prepupae, <i>Tyrophagus putrescentiae</i> (Schrank) (Acari: Sarcoptiformes) Acaridae] | Devel. time = $6.6 \pm 0.6$ days<br><br>Fecundity = $71.6 \pm 9.1$ eggs/female<br>$r_m = 0.28$<br><br>Fecundity 1.12x higher than with <i>F. occidentalis</i> and 1.66x higher than with <i>T. putrescentiae</i> | Lab | [143]           |
|  |  | <i>Cosmolaelaps</i> n.sp.1                                     | Mix of <i>Acrobeloides</i> spp. (Cephalobidae), <i>Aphelenchoides</i> sp. (Aphelenchoididae), and <i>Aphelenchus avenae</i> Bastian (Aphelenchidae), <i>Panagrolaimus</i> sp. (Panagrolaimidae) [FL] | -                                                                                                                                                                             | Reared                                                                                                                                                                                                           | Lab | [7]             |
|  |  | <i>Cosmolaelaps</i> n.sp.2                                     | Mix of <i>Acrobeloides</i> spp. (Cephalobidae), <i>Aphelenchoides</i> sp. (Aphelenchoididae), and <i>Aphelenchus avenae</i> Bastian (Aphelenchidae), <i>Panagrolaimus</i> sp. (Panagrolaimidae) [FL] | -                                                                                                                                                                             | -                                                                                                                                                                                                                | Lab | [7]             |

|  |  |                                                       |                                                                                                           |                                                                                                                                                                                                       |                                                                                                                                                                                                                                              |                                                      |       |
|--|--|-------------------------------------------------------|-----------------------------------------------------------------------------------------------------------|-------------------------------------------------------------------------------------------------------------------------------------------------------------------------------------------------------|----------------------------------------------------------------------------------------------------------------------------------------------------------------------------------------------------------------------------------------------|------------------------------------------------------|-------|
|  |  | <i>Cosmolaelaps simplex</i> Berlese                   | <i>Meloidogyne javanica</i> (Treub) Chitwood (Meloidogynidae) eggs [PP]                                   | (C) [ <i>Sancassania rodriguezi</i> (Samsinak) (= <i>Caloglyphus rodriguezi</i> Samsinak) (Acari: Sarcoptiformes: Acaridae), <i>Tylenchulus semipenetrans</i> Cobb (Nematoda: Tylenchulidae)]         | Devel. time = female: 12.6 ± 1.2 days; male: 8.8 ± 1.3 days<br><br>$r_m = 0.123$<br><br>$r_m$ 1.03 and 1.1x lower than with <i>T. semipenetrans</i> and <i>S. rodriguezi</i>                                                                 | Lab                                                  | [144] |
|  |  |                                                       | <i>Tylenchulus semipenetrans</i> Cobb (Tylenchulidae) eggs and J2 [PP]                                    | (C) [ <i>Meloidogyne javanica</i> (Treub) Chitwood (Nematoda: Meloidogynidae), <i>Sancassania rodriguezi</i> (Samsinak) (= <i>Caloglyphus rodriguezi</i> Samsinak) (Acari: Sarcoptiformes: Acaridae)] | Devel. time = female: 13.9 ± 1.4 days; male: 10.6 ± 1.1 days<br><br>$r_m = 0.127$<br><br>$r_m$ 1.1x higher than with <i>M. javanica</i> , but 1.06x lower than with <i>S. rodriguezi</i><br><br>Reduction of the number of nematodes in pots | Lab<br><br>Greenhouse:<br>Pots with citrus seedlings | [144] |
|  |  | <i>Cosmolaelaps</i> sp. nr <i>multisetosus</i> Domrow | Mix of <i>Panagrellus silusiae</i> (de Man) (Panagrolaimidae) and <i>Rhabditis</i> sp. (Rhabditidae) [FL] | -                                                                                                                                                                                                     | -                                                                                                                                                                                                                                            | Lab                                                  | [160] |



|  |  |                                                                                                                   |                                                   |                                                                                                                                                                                                                                                                                                                                                                                                                                                         |                                                                                                                                     |     |       |
|--|--|-------------------------------------------------------------------------------------------------------------------|---------------------------------------------------|---------------------------------------------------------------------------------------------------------------------------------------------------------------------------------------------------------------------------------------------------------------------------------------------------------------------------------------------------------------------------------------------------------------------------------------------------------|-------------------------------------------------------------------------------------------------------------------------------------|-----|-------|
|  |  | <i>Cosmolaelaps vacuus</i><br>(Michael) (= <i>Hypoaspis</i><br>( <i>Cosmolaelaps</i> ) <i>vacua</i><br>(Michael)) | <i>Acrobeloides</i> sp.<br>(Cephalobidae)<br>[FL] | (C)<br>[ <i>Aphelenchus</i> sp.<br>(Nematoda:<br>Aphelenchidae),<br><i>Mesaphorura silvicola</i><br>(Folsom) (= <i>Tullbergia</i><br><i>granulata</i> Mills)<br>(Collembola:<br>Tullbergiidae),<br><i>Oppiella</i> (O.) <i>nova</i><br>(Oudemans) (Acari:<br>Sarcoptiformes:<br>Oppidae)<br><i>Panagrolaimus</i> sp.<br>(Nematoda:<br>Panagrolaimidae),<br><i>Tyrophagus</i><br><i>putrescentiae</i> (Schrank)<br>(Acari: Sarcoptiformes:<br>Acaridae)] | Devel. time = $9.7 \pm 0.8$ days<br><br>Oviposition occurred<br><br>Developmental time<br>shorter than with<br>Collembola and mites | Lab | [130] |
|--|--|-------------------------------------------------------------------------------------------------------------------|---------------------------------------------------|---------------------------------------------------------------------------------------------------------------------------------------------------------------------------------------------------------------------------------------------------------------------------------------------------------------------------------------------------------------------------------------------------------------------------------------------------------|-------------------------------------------------------------------------------------------------------------------------------------|-----|-------|

|  |  |  |                                                                                                                                                                                                                                             |                                                                                                                                                                                                                                                                                                                                                                                                                                                           |                                                                                                                                        |     |       |
|--|--|--|---------------------------------------------------------------------------------------------------------------------------------------------------------------------------------------------------------------------------------------------|-----------------------------------------------------------------------------------------------------------------------------------------------------------------------------------------------------------------------------------------------------------------------------------------------------------------------------------------------------------------------------------------------------------------------------------------------------------|----------------------------------------------------------------------------------------------------------------------------------------|-----|-------|
|  |  |  | <p><i>Aphelenchus</i> sp.<br/>(Aphelenchidae)<br/>[FL]</p>                                                                                                                                                                                  | <p>(C)<br/>[<i>Acrobeloides</i> sp.<br/>(Nematoda:<br/>Cephalobidae,<br/><i>Mesaphorura silvicola</i><br/>(Folsom) (= <i>Tullbergia granulata</i> Mills)<br/>(Collembola:<br/>Tullbergiidae),<br/><i>Oppiella</i> (O.) <i>nova</i><br/>(Oudemans) (Acari:<br/>Sarcoptiformes:<br/>Oppidae,<br/><i>Panagrolaimus</i> sp.<br/>(Nematoda:<br/>Panagrolaimidae),<br/><i>Tyrophagus putrescentiae</i> (Schrank)<br/>(Acari: Sarcoptiformes:<br/>Acaridae)]</p> | <p>Devel. time = <math>8.0 \pm 0.7</math> days</p> <p>Oviposition occurred</p> <p>Developmental time shorter than with other preys</p> | Lab | [130] |
|  |  |  | <p>Mix of <i>Acrobeloides</i> spp.<br/>(Cephalobidae),<br/><i>Aphelenchoides</i> sp.<br/>(Aphelenchoididae), and<br/><i>Aphelenchus avenae</i> Bastian<br/>(Aphelenchidae),<br/><i>Panagrolaimus</i> sp.<br/>(Panagrolaimidae)<br/>[FL]</p> | -                                                                                                                                                                                                                                                                                                                                                                                                                                                         | Reared                                                                                                                                 | Lab | [7]   |

|  |  |  |                                                                                                                                                                                                                                                                                     |                                                                                                                                                                                                                                                                           |                                                                                                      |     |       |
|--|--|--|-------------------------------------------------------------------------------------------------------------------------------------------------------------------------------------------------------------------------------------------------------------------------------------|---------------------------------------------------------------------------------------------------------------------------------------------------------------------------------------------------------------------------------------------------------------------------|------------------------------------------------------------------------------------------------------|-----|-------|
|  |  |  | Mix of <i>Acrobelloides</i> sp. (Cephalobidae), <i>Aphelenchus</i> sp. (Aphelenchidae), <i>Panagrolaimus</i> sp. (Panagrolaimidae) [FL]                                                                                                                                             | (C) [ <i>Mesaphorura silvicola</i> (Folsom) (= <i>Tullbergia granulata</i> Mills) (Collembola: Tullbergiidae), <i>Oppiella</i> (O.) <i>nova</i> (Oudemans) (Acari: Sarcoptiformes: Oppidae), <i>Tyrophagus putrescentiae</i> (Schränk) (Acari: Sarcoptiformes: Acaridae)] | Devel. time = $9.8 \pm 1.6$ days<br><br>Shorter development time with nematodes than with arthropods | Lab | [7]   |
|  |  |  | Mix of <i>Panagrolaimus</i> sp. (Panagrolaimidae), <i>Acrobelloides nanus</i> (de Man) Anderson (= <i>Cephalobus nanus</i> ) and <i>Acrobelloides</i> spp. (Cephalobidae), <i>Aphelenchoides</i> sp. (Aphelenchoididae), and <i>Aphelenchus avenae</i> Bastian (Aphelenchidae) [FL] | -                                                                                                                                                                                                                                                                         | Reared from larva to adult                                                                           | Lab | [6]   |
|  |  |  | <i>Steinernema feltiae</i> (Filipjev) Wouts, Mráček, Gerdin & Bedding (Steinernematidae) [AP]                                                                                                                                                                                       | -                                                                                                                                                                                                                                                                         | Reared only from larva to deutonymph                                                                 | Lab | [112] |

|  |  |                                                                                              |                                                                                                                                                                                                                              |                                                                                                                                                                                                                                                                                                                                                                                                                                                   |                                                                                                                                     |      |       |
|--|--|----------------------------------------------------------------------------------------------|------------------------------------------------------------------------------------------------------------------------------------------------------------------------------------------------------------------------------|---------------------------------------------------------------------------------------------------------------------------------------------------------------------------------------------------------------------------------------------------------------------------------------------------------------------------------------------------------------------------------------------------------------------------------------------------|-------------------------------------------------------------------------------------------------------------------------------------|------|-------|
|  |  |                                                                                              | <i>Panagrolaimus</i> sp.<br>(Panagrolaimidae)<br>[FL]                                                                                                                                                                        | (C)<br>[ <i>Acrobeloides</i> sp.<br>(Nematoda:<br>Cephalobidae),<br><i>Aphelenchus</i> sp.<br>(Nematoda:<br>Aphelenchidae),<br><i>Mesaphorura silvicola</i><br>(Folsom) (= <i>Tullbergia</i><br><i>granulata</i> Mills)<br>(Collembola:<br>Tullbergiidae),<br><i>Oppiella</i> (O.) <i>nova</i><br>(Oudemans) (Acari:<br>Sarcoptiformes:<br>Oppidae), <i>Tyrophagus</i><br><i>putrescentiae</i> (Schrank)<br>(Acari: Sarcoptiformes:<br>Acaridae)] | Devel. time = 10.8 ± 2.6<br>days<br><br>Oviposition occurred<br><br>Developmental time<br>shorter than with<br>Collembola and mites | Lab  | [130] |
|  |  |                                                                                              | Unidentified nematode<br>[possibly FL]                                                                                                                                                                                       | -                                                                                                                                                                                                                                                                                                                                                                                                                                                 | Reared from larva to adult                                                                                                          | Lab? | [97]  |
|  |  |                                                                                              | Unidentified nematode<br>[possibly FL]                                                                                                                                                                                       | -                                                                                                                                                                                                                                                                                                                                                                                                                                                 | -                                                                                                                                   | Lab  | [244] |
|  |  | <i>Euandrolaelaps karawaiewi</i><br>(Berlese) (= <i>Hypoaspis</i> cf.<br><i>karawaiewi</i> ) | Mix of <i>Acrobeloides</i> spp.<br>(Cephalobidae),<br><i>Aphelenchoides</i> sp.<br>(Aphelenchoididae), and<br><i>Aphelenchus avenae</i> Bastian<br>(Aphelenchidae),<br><i>Panagrolaimus</i> sp.<br>(Panagrolaimidae)<br>[FL] | -                                                                                                                                                                                                                                                                                                                                                                                                                                                 | Reared                                                                                                                              | Lab  | [7]   |

|  |  |                                                                                     |                                                                                                                                                                                                                                                                                   |   |                                                             |                           |       |
|--|--|-------------------------------------------------------------------------------------|-----------------------------------------------------------------------------------------------------------------------------------------------------------------------------------------------------------------------------------------------------------------------------------|---|-------------------------------------------------------------|---------------------------|-------|
|  |  |                                                                                     | Mix of <i>Panagrolaimus</i> sp. (Panagrolaimidae), <i>Acrobeloides nanus</i> (de Man) Anderson (= <i>Cephalobus nanus</i> ) and <i>Acrobeloides</i> spp. (Cephalobidae), <i>Aphelenchoides</i> sp. (Aphelenchoididae), and <i>Aphelenchus avenae</i> Bastian (Aphelenchidae) [FL] | - | Reared from larva to adult                                  | Lab                       | [6]   |
|  |  |                                                                                     | Unidentified nematode [possibly FL]                                                                                                                                                                                                                                               | - | Reared from larva to adult                                  | Lab?                      | [97]  |
|  |  | <i>Gaeolaelaps aculeifer</i> (Canestrini) (= <i>Hypoaspis aculeifer</i> Canestrini) | <i>Heterodera schachtii</i> Schmidt (Heteroderidae) egg masses [PP]                                                                                                                                                                                                               | - | -                                                           | Field: Observations       | [268] |
|  |  |                                                                                     | <i>Meloidogyne chitwoodi</i> Golden, O'Bannon, Santo & Finley (Meloidogynidae) eggs masses [PP]                                                                                                                                                                                   | - | -                                                           | Field: Observations       | [268] |
|  |  |                                                                                     | <i>Meloidogyne hapla</i> Chitwood (Meloidogynidae) egg masses [PP]                                                                                                                                                                                                                | - | -                                                           | Field: Observations       | [268] |
|  |  |                                                                                     | Mix? of saprophagous nematodes and <i>Globodera rostochiensis</i> (Wollenweber) Skarbilovich (= <i>Heterodera rostochiensis</i> Wollenweber) (Heteroderidae) [FL, PP]                                                                                                             | - | 5-fold in a field contaminated with <i>G. rostochiensis</i> | Lab<br>Field observation: | [172] |
|  |  |                                                                                     |                                                                                                                                                                                                                                                                                   |   |                                                             |                           |       |

|  |  |  |                                                                                                                                                                                      |                                                                                                                                           |                                                                                                          |     |       |
|--|--|--|--------------------------------------------------------------------------------------------------------------------------------------------------------------------------------------|-------------------------------------------------------------------------------------------------------------------------------------------|----------------------------------------------------------------------------------------------------------|-----|-------|
|  |  |  | Mix? of saprophagous nematodes and <i>Globodera rostochiensis</i> (Wollenweber) Skarbilovich (= <i>Heterodera rostochiensis</i> Wollenweber) (Heteroderidae) [FL, PP]                | (C) [Juvenile Oribatida (Acari: Sarcoptiformes), unidentified Collembola, unidentified Acaridae (=Tyroglyphidae) (Acari: Sarcoptiformes)] | Mix of Collembola and mites preferred<br><br>5-fold in a field contaminated with <i>G. rostochiensis</i> | Lab | [145] |
|  |  |  | Mix of nematodes, mainly <i>Pratylenchus</i> (Pratylenchidae), <i>Paratylenchus</i> (Tylenchulidae), <i>Tylenchorhynchus</i> (Dolichodoridae), and saprophagous Tylenchidae [FL, PP] | -                                                                                                                                         | -                                                                                                        | Lab | [139] |
|  |  |  | <i>Panagrellus redivivus</i> (Linnaeus) (= <i>Turbatrix silusiae</i> (de Man)) (Panagrolaimidae)                                                                                     | (C) [conspecifics <i>G. aculeifer</i> eggs, larvae and nymphs]                                                                            | Devel. time = 14 ± 0.1 days                                                                              | Lab | [149] |

|  |  |  |                                                                                                                                                  |                                                                                                                                                                                                                                                                                                                                                                                                  |                                                                                                               |     |       |
|--|--|--|--------------------------------------------------------------------------------------------------------------------------------------------------|--------------------------------------------------------------------------------------------------------------------------------------------------------------------------------------------------------------------------------------------------------------------------------------------------------------------------------------------------------------------------------------------------|---------------------------------------------------------------------------------------------------------------|-----|-------|
|  |  |  | [FL]                                                                                                                                             | (C)<br>[ <i>Enchytraeus crypticus</i><br>Westheide & Graefe<br>(Annelida:<br>Enchytraeidae),<br><i>Folsomia candida</i><br>Willem (Collembola:<br>Isotomidae), <i>Folsomia<br/>fimetaria</i> (Linnæus)<br>(Collembola:<br>Isotomidae),<br><i>Sancassania</i> cf. <i>michaeli</i><br>(Oudemans) (= <i>Caloglyphus</i> cf. <i>michaeli</i><br>(Oudemans)) (Acari:<br>Sarcoptiformes:<br>Acaridae)] | 179 – 257 juveniles/10<br>females/3 weeks<br><br>Juvenile production 1.72x<br>higher with <i>F. fimetaria</i> | Lab | [147] |
|  |  |  | <i>Pellioditis hermaphrodita</i><br>(Schneider) (= <i>Phasmarhabditis<br/>hermaphrodita</i> (A.<br>Schneider) Andrassy)<br>(Rhabditidae)<br>[AP] | -                                                                                                                                                                                                                                                                                                                                                                                                | Nematode DNA detected<br>in predator gut<br><br>Consumed occasionally                                         | Lab | [100] |
|  |  |  | <i>Pelodera strongyloides</i><br>(Schneider) Schneider<br>(Rhabditidae)<br>[FL]                                                                  | -                                                                                                                                                                                                                                                                                                                                                                                                | -                                                                                                             | Lab | [170] |
|  |  |  | <i>Rhabditis</i> spp.<br>(Rhabditidae)<br>[FL]                                                                                                   | -                                                                                                                                                                                                                                                                                                                                                                                                | -                                                                                                             | Lab | [170] |

|  |  |  |                                                                                                        |                                                                                                                                                                                                               |                                                                                                                                                                            |                                                                                     |       |
|--|--|--|--------------------------------------------------------------------------------------------------------|---------------------------------------------------------------------------------------------------------------------------------------------------------------------------------------------------------------|----------------------------------------------------------------------------------------------------------------------------------------------------------------------------|-------------------------------------------------------------------------------------|-------|
|  |  |  | <i>Rhabditis</i> sp.<br>(Rhabditidae)[FL]                                                              | (C)<br>[ <i>Protaphorura</i> sp.<br>group <i>armata</i><br>(Tullberg) (= <i>Onychiurus</i> sp. group <i>armata</i> ) (Collembola: Onychiuridae),<br><i>Tribolium</i> sp.<br>(Coleoptera: Tenebrionidae) eggs] | Devel. time = ~ 31 days (at 15°C)<br><br>Fecundity = ~11 – 14 eggs/female (at 15°C)<br><br>Fecundity 1.9 – 2.4 x higher with <i>Tribolium</i> sp. eggs than with nematodes | Lab                                                                                 | [146] |
|  |  |  | <i>Steinernema feltiae</i> (Filipjev)<br>Wouts, Mráček, Gerdin & Bedding<br>(Steinernematidae)<br>[AP] | -                                                                                                                                                                                                             | Nematode DNA detected in predator gut<br><br>Consumed occasionally                                                                                                         | Lab                                                                                 | [100] |
|  |  |  | <i>Tylenchorhynchus dubius</i> (Bütschli) (Dolichodoridae)<br>[PP]                                     | -                                                                                                                                                                                                             | Significant reduction of nematodes                                                                                                                                         | Glasshouse:<br>Potted grasses                                                       | [138] |
|  |  |  | <i>Tylenchorhynchus dubius</i> (Bütschli) (Dolichodoridae)<br>[PP]                                     | -                                                                                                                                                                                                             | Reduction of nematode population                                                                                                                                           | Glasshouse:<br>Potted grasses                                                       | [139] |
|  |  |  | <i>Tylenchulus semipenetrans</i> Cobb (Tylenchulidae)<br>[PP]                                          | -                                                                                                                                                                                                             | 24.4 – 42.9% reduction of nematode population                                                                                                                              | Greenhouse:<br>Pots with key lime ( <i>Citrus aurantiifolia</i> (Christm.) Swingle) | [140] |
|  |  |  | Unidentified nematode [possibly FL]                                                                    | -                                                                                                                                                                                                             | -                                                                                                                                                                          | Lab                                                                                 | [243] |
|  |  |  | Unidentified nematode [possibly FL]                                                                    | -                                                                                                                                                                                                             | -                                                                                                                                                                          | Field:<br>Observations?                                                             | [254] |



|  |  |                                                                                               |                                                                                                                                                                                                                                                                                     |                                                                                                                                                                      |                                                                                                               |      |       |
|--|--|-----------------------------------------------------------------------------------------------|-------------------------------------------------------------------------------------------------------------------------------------------------------------------------------------------------------------------------------------------------------------------------------------|----------------------------------------------------------------------------------------------------------------------------------------------------------------------|---------------------------------------------------------------------------------------------------------------|------|-------|
|  |  | <i>Gaeolaelaps</i> nr. <i>aculeifer</i> (Canestrini)                                          | Mix of <i>Acrobelloides</i> spp. (Cephalobidae), <i>Aphelenchoides</i> sp. (Aphelenchoididae), and <i>Aphelenchus avenae</i> Bastian (Aphelenchidae), <i>Panagrolaimus</i> sp. (Panagrolaimidae) [FL]                                                                               | -                                                                                                                                                                    | Reared                                                                                                        | Lab  | [7]   |
|  |  | <i>Gaeolaelaps</i> cf. <i>similisetae</i> (Karg) (= <i>Hypoaspis</i> cf. <i>similisetae</i> ) | Mix of <i>Panagrolaimus</i> sp. (Panagrolaimidae), <i>Acrobelloides nanus</i> (de Man) Anderson (= <i>Cephalobus nanus</i> ) and <i>Acrobelloides</i> spp. (Cephalobidae), <i>Aphelenchoides</i> sp. (Aphelenchoididae), and <i>Aphelenchus avenae</i> Bastian (Aphelenchidae) [FL] | -                                                                                                                                                                    | Reared from larva to adult                                                                                    | Lab  | [6]   |
|  |  |                                                                                               | Unidentified nematode [possibly FL]                                                                                                                                                                                                                                                 | -                                                                                                                                                                    | Reared from larva to adult                                                                                    | Lab? | [97]  |
|  |  | <i>Gaeolaelaps queenslandicus</i> (Womersley) (= <i>Hypoaspis angustus</i> Karg)              | <i>Heterorhabditis heliothidis</i> Khan, Brooks & Hirschmann (Heterorhabditidae) [AP]                                                                                                                                                                                               | -                                                                                                                                                                    | Fecundity = ~ 57 eggs/day                                                                                     | Lab  | [173] |
|  |  | <i>Gaeolaelaps oreithyiae</i> Walter & Oliver                                                 | <i>Acrobelloides</i> sp. (Cephalobidae) [FL]                                                                                                                                                                                                                                        | (C) [ <i>Hypogastrura scotti</i> (Yosii) (Hypogastruridae), <i>Mesaphorura silvicola</i> (Folsom) (= <i>Tullbergia granulata</i> Mills) (Collembola: Tullbergiidae)] | Devel. time = ~14.5 days<br>2.2 ± 0.2 eggs/female/day<br>Daily oviposition 2x higher than with the Collembola | Lab  | [148] |

|  |  |                                                                      |                                                                                                                                                                                                                              |   |                                      |      |       |
|--|--|----------------------------------------------------------------------|------------------------------------------------------------------------------------------------------------------------------------------------------------------------------------------------------------------------------|---|--------------------------------------|------|-------|
|  |  | <i>Hypoaspis</i> sp. (possibly <i>Gaeolaelaps</i> )                  | <i>Steinernema feltiae</i> (Filipjev)<br>Wouts, Mráček, Gerdin & Bedding<br>(Steinernematidae)<br>[AP]                                                                                                                       | - | Reared only from larva to deutonymph | Lab  | [112] |
|  |  | <i>Hypoaspis</i> spp.                                                | Mix of <i>Acrobeloides</i> spp.<br>(Cephalobidae),<br><i>Aphelenchoides</i> sp.<br>(Aphelenchoididae), and<br><i>Aphelenchus avenae</i> Bastian<br>(Aphelenchidae),<br><i>Panagrolaimus</i> sp.<br>(Panagrolaimidae)<br>[FL] | - | Reared                               | Lab  | [7]   |
|  |  | <i>Hypoaspis</i> nr. <i>giffordi</i> (Evans & Till)                  | Unidentified nematode<br>[possibly FL]                                                                                                                                                                                       | - | Reared from larva to adult           | Lab? | [97]  |
|  |  | <i>Laelaspis</i> sp.                                                 | Mix of <i>Acrobeloides</i> spp.<br>(Cephalobidae),<br><i>Aphelenchoides</i> sp.<br>(Aphelenchoididae), and<br><i>Aphelenchus avenae</i> Bastian<br>(Aphelenchidae),<br><i>Panagrolaimus</i> sp.<br>(Panagrolaimidae)<br>[FL] | - | Reared                               | Lab  | [7]   |
|  |  | <i>Ololaelaps venetus</i> (Berlese)<br>(= <i>Ololaelaps veneta</i> ) | Mix of <i>Acrobeloides</i> spp.<br>(Cephalobidae),<br><i>Aphelenchoides</i> sp.<br>(Aphelenchoididae), and<br><i>Aphelenchus avenae</i> Bastian<br>(Aphelenchidae),<br><i>Panagrolaimus</i> sp.<br>(Panagrolaimidae)<br>[FL] | - | Reared                               | Lab  | [7]   |

|  |  |                                                                                                                     |                                                                                                                                                                                                                                                                                   |   |                                      |      |       |
|--|--|---------------------------------------------------------------------------------------------------------------------|-----------------------------------------------------------------------------------------------------------------------------------------------------------------------------------------------------------------------------------------------------------------------------------|---|--------------------------------------|------|-------|
|  |  |                                                                                                                     | Mix of <i>Panagrolaimus</i> sp. (Panagrolaimidae), <i>Acrobeloides nanus</i> (de Man) Anderson (= <i>Cephalobus nanus</i> ) and <i>Acrobeloides</i> spp. (Cephalobidae), <i>Aphelenchoides</i> sp. (Aphelenchoididae), and <i>Aphelenchus avenae</i> Bastian (Aphelenchidae) [FL] | - | Reared from larva to adult           | Lab  | [6]   |
|  |  |                                                                                                                     | <i>Steinernema feltiae</i> (Filipjev) Wouts, Mráček, Gerdin & Bedding (Steinernematidae) [AP]                                                                                                                                                                                     | - | Reared only from larva to protonymph | Lab  | [112] |
|  |  |                                                                                                                     | Unidentified nematode [possibly FL]                                                                                                                                                                                                                                               | - | Reared from larva to adult           | Lab? | [97]  |
|  |  | <i>Pseudoparasitus missouriensis</i> (Ewing) (= <i>Pseudoparasitus austriacus</i> (Sellnick))                       | Unidentified nematode [possibly FL]                                                                                                                                                                                                                                               | - | Reared from larva to adult           | Lab? | [97]  |
|  |  | <i>Pseudoparasitus</i> nr. <i>missouriensis</i> (Ewing) (= <i>Pseudoparasitus</i> nr. <i>austriacus</i> (Sellnick)) | Mix of <i>Acrobeloides</i> spp. (Cephalobidae), <i>Aphelenchoides</i> sp. (Aphelenchoididae), and <i>Aphelenchus avenae</i> Bastian (Aphelenchidae), <i>Panagrolaimus</i> sp. (Panagrolaimidae) [FL]                                                                              | - | -                                    | Lab  | [7]   |

|  |  |                                                   |                                                                                                                                                                                                                                                                                   |   |                                              |      |           |
|--|--|---------------------------------------------------|-----------------------------------------------------------------------------------------------------------------------------------------------------------------------------------------------------------------------------------------------------------------------------------|---|----------------------------------------------|------|-----------|
|  |  | <i>Pseudoparasitus</i> n.sp.                      | Mix of <i>Acrobeloides</i> spp. (Cephalobidae), <i>Aphelenchoides</i> sp. (Aphelenchoididae), and <i>Aphelenchus avenae</i> Bastian (Aphelenchidae), <i>Panagrolaimus</i> sp. (Panagrolaimidae) [FL]                                                                              | - | -                                            | Lab  | [7]       |
|  |  | <i>Pseudoparasitus</i> n.sp.                      | Mix of <i>Acrobeloides nanus</i> (de Man) Anderson (= <i>Cephalobus nanus</i> ) and <i>Acrobeloides</i> spp. (Cephalobidae), <i>Aphelenchoides</i> sp. (Aphelenchoididae), <i>Aphelenchus avenae</i> Bastian (Aphelenchidae), and <i>Panagrolaimus</i> sp. (Panagrolaimidae) [FL] | - | Reared from larva to adult                   | Lab  | [6]       |
|  |  |                                                   | Unidentified nematode [possibly FL]                                                                                                                                                                                                                                               | - | -                                            | Lab? | [97]      |
|  |  | <i>Stratiolaelaps lamington</i> Walter & Campbell | Mix of <i>Panagrellus silusiae</i> (de Man) (Panagrolaimidae) and <i>Rhabditis</i> sp. (Rhabditidae) [FL]                                                                                                                                                                         | - | -                                            | Lab  | [160,269] |
|  |  | <i>Stratiolaelaps lorna</i> Walter & Campbell     | Mix of <i>Panagrellus silusiae</i> (de Man) (Panagrolaimidae) and <i>Rhabditis</i> sp. (Rhabditidae) [FL]                                                                                                                                                                         | - | Reproduction occurred (colonies established) | Lab  | [160,269] |

|  |  |                                          |                                                                                                       |                                                                   |                                                                                                                                    |                                                                      |       |
|--|--|------------------------------------------|-------------------------------------------------------------------------------------------------------|-------------------------------------------------------------------|------------------------------------------------------------------------------------------------------------------------------------|----------------------------------------------------------------------|-------|
|  |  | <i>Stratiolaelaps miles</i> (Berlese)    | <i>Tylenchulus semipenetrans</i> Cobb (Tylenchulidae) [PP]                                            | -                                                                 | Colonized Citrus nematode culture (one of the dominant species)<br><br>Laboratory cultures on nematode prey                        | Greenhouse: Citrus nematode ( <i>T. semipenetrans</i> ) box cultures | [117] |
|  |  |                                          | <i>Panagrellus redivivus</i> (Linnaeus) (= <i>Turbatrix silusiae</i> (de Man)) (Panagrolaimidae) [FL] | (C) [conspecifics <i>S. miles</i> eggs, larvae and nymphs]        | Devel. time = 11 ± 0.1 days                                                                                                        | Lab                                                                  | [149] |
|  |  |                                          | <i>Steinernema feltiae</i> (Filipjev) Wouts, Mráček, Gerdin & Bedding (Steinernematidae) [AP]         | -                                                                 | -                                                                                                                                  | Lab                                                                  | [270] |
|  |  | <i>Stratiolaelaps scimitus</i> Womersley | <i>Meloidogyne incognita</i> (Kofoid & White) Chitwood (Meloidogynidae) J2 [PP]                       | (CM) [ <i>Rhabditella axei</i> (Cobbold) (Nematoda: Rhabditidae)] | Number of galls reduced (~30 – 40% of reduction) with the presence of <i>S. scimitus</i><br><br>Result of combined treatment below | Greenhouse: Pots with <i>Solanum lycopersicum</i> L.'Micro-Tom' in   | [24]  |

|  |  |  |                                                                                                           |                                                                                                 |                                                                                                                                                                                                                                                                                                    |                                                                               |           |
|--|--|--|-----------------------------------------------------------------------------------------------------------|-------------------------------------------------------------------------------------------------|----------------------------------------------------------------------------------------------------------------------------------------------------------------------------------------------------------------------------------------------------------------------------------------------------|-------------------------------------------------------------------------------|-----------|
|  |  |  |                                                                                                           | (C)<br>[ <i>Tyrophagus putrescentiae</i> (Schränk)<br>(Acari: Sarcoptiformes: Acaridae)]        | 1.95 ± 0.03<br>eggs/female/day<br><br>Fecundity = 92.80 ± 1.23<br><br>Daily oviposition and fecundity not significantly different from mites fed with <i>T. putrescentiae</i><br><br>400 mites per pot reduced the numbers of root knots and egg masses decreased by 50.9% and 62.8%, respectively | lab<br>Greenhouse: Pots with <i>Ipomoea aquatica</i> Forssk. (Convolvulaceae) | [141]     |
|  |  |  | Mix of <i>Panagrellus silusiae</i> (de Man) (Panagrolaimidae) and <i>Rhabditis</i> sp. (Rhabditidae) [FL] | -                                                                                               | -                                                                                                                                                                                                                                                                                                  | Lab                                                                           | [160,269] |
|  |  |  | <i>Rhabditella axei</i> (Cobbold) (Rhabditidae) [FL]                                                      | (CM)<br>[ <i>Meloidogyne incognita</i> (Kofoid & White)<br>Chitwood (Nematoda: Meloidogynidae)] | Number of galls reduced (~30 – 86% of reduction) in the combined treatment with <i>S. scimitus</i> + <i>R. axei</i> and only with <i>R. axei</i> compared to the treatment without <i>S. scimitus</i> and <i>R. axei</i>                                                                           | Greenhouse: Pots with <i>Solanum lycopersicum</i> L. 'Micro-Tom' in           | [24]      |

|  |                 |                                                                                                          |                                                                                                                                                                                                      |                                                                                                            |                                                    |     |           |
|--|-----------------|----------------------------------------------------------------------------------------------------------|------------------------------------------------------------------------------------------------------------------------------------------------------------------------------------------------------|------------------------------------------------------------------------------------------------------------|----------------------------------------------------|-----|-----------|
|  |                 | Unidentified species of a new genus                                                                      | Mix of <i>Acrobeloides</i> spp. (Cephalobidae), <i>Aphelenchoides</i> sp. (Aphelenchoididae), and <i>Aphelenchus avenae</i> Bastian (Aphelenchidae), <i>Panagrolaimus</i> sp. (Panagrolaimidae) [FL] | -                                                                                                          | Reared                                             | Lab | [7]       |
|  | Leptolaelapidae | Leptolaelapidae sp. 1                                                                                    | <i>Panagrellus silusiae</i> (de Man) (Panagrolaimidae) and <i>Rhabditis</i> sp. (Rhabditidae) [FL]                                                                                                   | -                                                                                                          | -                                                  | Lab | [160]     |
|  | Macrochelidae   | <i>Dissoloncha superbus</i> (Hull) (= <i>Macrocheles superbus</i> Hull)                                  | <i>Rhabditis</i> sp. (Rhabditidae) [FL]                                                                                                                                                              | (M) [ <i>Enchytraeus albidus</i> Henle (Annelida: Clitellata: Enchytraeidae)]                              | Reared (nematodes + enchytraeids)                  | Lab | [271]     |
|  |                 | <i>Geotrupacarus mycotrupetes</i> (Krantz & Mellot) (= <i>Macrocheles mycotrupetes</i> Krantz & Mellott) | <i>Haematozoon subulatum</i> Leisering (= <i>Rhitis inermiformis</i> (Osche) Andr ssy) (Rhabditidae) [FL]                                                                                            | -                                                                                                          | Reared from larva to adult. Reproduction occurred. | Lab | [171,272] |
|  |                 | <i>Glyptholaspis americana</i> (Berlese) (= <i>Macrocheles vagabundus</i> (Berlese))                     | <i>Panagrellus</i> sp. (Panagrolaimidae) [FL]                                                                                                                                                        | (M) [ <i>Lucilia</i> sp. (Diptera: Calliphoridae), <i>Musca vetustissima</i> Walker (Diptera: Tachinidae)] | Reared                                             | Lab | [273]     |

|  |  |                                    |                                                                                                               |                                                                                                                                                                                                                          |                                                                                                                                                                                               |     |       |
|--|--|------------------------------------|---------------------------------------------------------------------------------------------------------------|--------------------------------------------------------------------------------------------------------------------------------------------------------------------------------------------------------------------------|-----------------------------------------------------------------------------------------------------------------------------------------------------------------------------------------------|-----|-------|
|  |  |                                    | Unidentified nematode<br>[possibly FL]                                                                        | (C) <sup>xiii</sup><br>[ <i>Drosophila</i> larvae and pupae (Insecta: Diptera: Drosophilidae), lettuce leaves, cooked potatoes, Enchytraeidae (Annelida: Clitellata), <i>Hypogastrura</i> (Collembola: Hypogastruridae)] | <i>Drosophila</i> larvae preferred                                                                                                                                                            | Lab | [152] |
|  |  |                                    | <i>Rhabditis</i> sp. (Rhabditidae)<br>[FL]                                                                    | (C)<br>[ <i>Musca domestica</i> L. (Insecta: Diptera: Tachinidae) eggs and larvae]                                                                                                                                       | 0.24 eggs/female/day<br><br>Fecundity: 9.3 eggs/female<br><br>Fecundity 1.5x lower than with <i>M. domestica</i> eggs<br><br>Adults prefer <i>M. domestica</i> eggs over larvae and nematodes | Lab | [153] |
|  |  | <i>Glyptholaspis confusa</i> (Foà) | <i>Haematozoon subulatum</i> Leisering (= <i>Rhitis inermiformis</i> (Osche) Andrassy) (Rhabditidae)<br>[FL]  | -                                                                                                                                                                                                                        | Reared from larva to adult. Reproduction occurred.                                                                                                                                            | Lab | [171] |
|  |  |                                    | <i>Panagrellus redivivus</i> (Linnaeus) (Panagrolaimidae)<br>[FL]                                             | -                                                                                                                                                                                                                        | Few mites were found to feed on nematodes                                                                                                                                                     | Lab | [175] |
|  |  |                                    | <i>Rhabditella axei</i> (Cobbold) (= <i>Rhabditis elongate</i> (A. Schneider) Bütschli) (Rhabditidae)<br>[FL] | -                                                                                                                                                                                                                        | Few mites were found to feed on nematodes                                                                                                                                                     | Lab | [175] |



|  |  |                                                                              |                                                                                                                                                                                                                                                                                         |                                                                                                                                                   |                                                                                |                       |                         |
|--|--|------------------------------------------------------------------------------|-----------------------------------------------------------------------------------------------------------------------------------------------------------------------------------------------------------------------------------------------------------------------------------------|---------------------------------------------------------------------------------------------------------------------------------------------------|--------------------------------------------------------------------------------|-----------------------|-------------------------|
|  |  |                                                                              | <i>Rhabditella leptura</i> (Cobb)<br>Chitwood (Rhabditidae)<br>[FL]                                                                                                                                                                                                                     | -                                                                                                                                                 | -                                                                              | Lab                   | [156]                   |
|  |  |                                                                              | <i>Rhabditis</i> sp. (Rhabditidae)<br>[FL]                                                                                                                                                                                                                                              | (M)<br>[ <i>Enchytraeus albidus</i><br>Henle (Annelida:<br>Clitellata:<br>Enchytraeidae)]                                                         | Reared (nematodes +<br>enchytraeids)                                           | Lab                   | [271]                   |
|  |  | <i>Macrholaspis opacus</i> (Koch)<br>(= <i>Macrocheles opacus</i><br>(Koch)) | Unidentified nematode<br>[possibly FL]                                                                                                                                                                                                                                                  | (C) <sup>xiv</sup><br>[Dipteran larvae and<br>eggs (Insecta: Diptera),<br>Enchytraeidae<br>(Annelida: Clitellata),<br>unidentified<br>Collembola] | Dipteran larvae preferred                                                      | Lab                   | [152]                   |
|  |  | <i>Macrocheles boudreauxi</i><br>Krantz                                      | Unidentified nematodes in<br>galleries of <i>Dendroctonus</i><br><i>terebrans</i> (A.G.Olivier), <i>Ips</i><br><i>calligraphus</i> (Germar) , <i>Ips</i><br><i>grandicollis</i> Wood & Bright,<br>and <i>Ips avulsus</i> Wood &<br>Bright (Insecta: Coleoptera)<br>[possibly FL and AP] | -                                                                                                                                                 | -                                                                              | Field:<br>Observation | [274]<br><sup>xv</sup>  |
|  |  |                                                                              | <i>Rhabditis</i> sp. (Rhabditidae)<br>[FL]                                                                                                                                                                                                                                              | -                                                                                                                                                 | -                                                                              | Lab                   | [274]                   |
|  |  |                                                                              | Unidentified species<br>(Rhabditidae)<br>[FL]                                                                                                                                                                                                                                           | -                                                                                                                                                 | Devel. time = 88.5 – 110.5<br>hours<br><br>Fecundity = 20 – 115<br>eggs/female | Lab                   | [275]                   |
|  |  |                                                                              | Unidentified nematode<br>[possibly FL]                                                                                                                                                                                                                                                  | -                                                                                                                                                 | -                                                                              | Lab                   | [244]<br><sup>xvi</sup> |

|  |  |                                                                |                                                            |                                                                                                                                                                                                                                                                                                                                                                                                                             |                                                                                                                                                                                                                              |                                      |       |
|--|--|----------------------------------------------------------------|------------------------------------------------------------|-----------------------------------------------------------------------------------------------------------------------------------------------------------------------------------------------------------------------------------------------------------------------------------------------------------------------------------------------------------------------------------------------------------------------------|------------------------------------------------------------------------------------------------------------------------------------------------------------------------------------------------------------------------------|--------------------------------------|-------|
|  |  | <i>Macrocheles embersoni</i><br>Azevedo, Berto and<br>Castilho | <i>Rhabditella axei</i> (Cobbold)<br>(Rhabditidae)<br>[FL] | (C)<br>[ <i>Bradysia</i><br><i>matogrossensis</i> (Lane)<br>(Diptera: Sciaridae) L1,<br><i>Haematobia irritans</i> (L.)<br>(Diptera:<br>Muscidae) eggs, <i>Musca</i><br><i>domestica</i> L. (Diptera:<br>Muscidae) eggs and<br>L1, <i>Rhizoglyphus</i><br><i>echinopus</i> (Fumouze<br>and Robin) (Acari:<br>Sarcoptiformes:<br>Acaridae) nymphs,<br><i>Stomoxys calcitrans</i> (L.)<br>(Diptera: Muscidae)<br>eggs and L1] | Devel. time = $1.5 \pm 0.03$<br>days<br><br>$5.4 \pm 1.5$ eggs/female/day<br><br>$r_m = 0.28$<br><br>Daily oviposition 1.25 –<br>27x higher than with other<br>preys                                                         | Lab                                  | [155] |
|  |  |                                                                |                                                            | (CM)<br>[ <i>Musca domestica</i> L.<br>(Diptera: Muscidae)<br>L1]                                                                                                                                                                                                                                                                                                                                                           | Nematode: $1.0 \pm 0.1$<br>eggs/female/day<br>Nem. + other prey = $1.3 \pm$<br>$0.2$ eggs/female/day<br><br>Fly emergency was<br>reduced more than 50% in<br>te 2 <sup>nd</sup> week when<br>nematodes were also<br>present. | Lab:<br>Petri dish and<br>containers | [23]  |

|  |  |                                                  |                                                                                                                                                                                                         |                                                                                                                                                                                              |                                                                                           |     |       |
|--|--|--------------------------------------------------|---------------------------------------------------------------------------------------------------------------------------------------------------------------------------------------------------------|----------------------------------------------------------------------------------------------------------------------------------------------------------------------------------------------|-------------------------------------------------------------------------------------------|-----|-------|
|  |  | <i>Macrocheles glaber</i> (Müller)               | Unidentified nematode (Rhabditidae)<br>[FL]                                                                                                                                                             | (C)<br>[ <i>Enchytraeus albidus</i> Henle (Annelida: Clitellata: Enchytraeidae), <i>Musca domestica</i> L. (Insecta: Diptera: Tachinidae) eggs, unidentified Collembola, unidentified yeast] | 23.5 eggs/5 females/13 days<br><br>Fecundity 138 – 3.2 x higher than with the other diets | Lab | [150] |
|  |  |                                                  | <i>Panagrellus</i> sp. (Panagrolaimidae)<br>[FL]                                                                                                                                                        | (M)<br>[ <i>Lucilia</i> sp. (Diptera: Calliphoridae), <i>Musca vetustissima</i> Walker (Diptera: Tachinidae)]                                                                                | Reared                                                                                    | Lab | [273] |
|  |  | <i>Macrocheles</i> nr. <i>insignitus</i> Berlese | Mix of <i>Acrobeloides</i> spp. (Cephalobidae), <i>Aphelenchoides</i> sp. (Aphelenchoididae), and <i>Aphelenchus avenae</i> Bastian (Aphelenchidae), <i>Panagrolaimus</i> sp. (Panagrolaimidae)<br>[FL] | -                                                                                                                                                                                            | Reared                                                                                    | Lab | [7]   |
|  |  | <i>Macrocheles matrius</i> Hull                  | Unidentified nematode (Rhabditidae)<br>[FL]                                                                                                                                                             | -                                                                                                                                                                                            | Devel. time = 38.5 (at 34°C)–503 (at 12°C) hours                                          | Lab | [276] |

|  |  |                                               |                                                                              |                                                                                                                               |                                                                                                                                                                                                                                                      |     |       |
|--|--|-----------------------------------------------|------------------------------------------------------------------------------|-------------------------------------------------------------------------------------------------------------------------------|------------------------------------------------------------------------------------------------------------------------------------------------------------------------------------------------------------------------------------------------------|-----|-------|
|  |  |                                               | <i>Rhabditella axei</i> (Cobbold)<br>(Rhabditidae)<br>[FL]                   | (M)<br>[ <i>Musca domestica</i> L.<br>(Insecta: Diptera:<br>Tachinidae)]                                                      | Devel. time = 38 (at 32°C) –<br>503 (at 12°C) hours with<br>mixed diet<br><br>4.2 (at 32°C) – 27.8 (at<br>28°C)<br>offspring/female/day with<br>mixed diet<br><br>Fecundity = 21 (at 32°C) –<br>200 (at 28°C)<br>offspring/female with<br>mixed diet | Lab | [277] |
|  |  | <i>Macrocheles merdarius</i><br>(Berlese)     | <i>Panagrellus</i> sp.<br>(Panagrolaimidae)<br>[FL]                          | (M)<br>[ <i>Lucilia</i> sp. (Diptera:<br>Calliphoridae), <i>Musca</i><br><i>vetustissima</i> Walker<br>(Diptera: Tachinidae)] | Reared                                                                                                                                                                                                                                               | Lab | [273] |
|  |  |                                               | <i>Rhabditella leptura</i> (Cobb)<br>Chitwood (Rhabditidae)<br>[FL]          | -                                                                                                                             | Reared                                                                                                                                                                                                                                               | Lab | [278] |
|  |  |                                               | Unidentified nematode<br>(Rhabditidae)<br>[FL]                               | (M)<br>[ <i>Musca domestica</i> L.<br>(Insecta: Diptera:<br>Tachinidae) eggs]                                                 | 0.25 – 0.75 offspring<br>(eggs+larvae)/30 females/3<br>hours                                                                                                                                                                                         | Lab | [279] |
|  |  | <i>Macrocheles muscaedomesticae</i> (Scopoli) | <i>Aphelenchus avenae</i> Bastian<br>(Aphelenchidae)<br>[FL]                 | -                                                                                                                             | Aggregation in pits of<br>nematodes and active<br>feeding                                                                                                                                                                                            | Lab | [175] |
|  |  |                                               | <i>Aphelenchoides composticola</i><br>Franklin<br>(Aphelenchoididae)<br>[FL] | -                                                                                                                             | Aggregation in pits of<br>nematodes and active<br>feeding                                                                                                                                                                                            | Lab | [175] |

|  |  |  |                                                                                                                                      |                                                                                                                                          |                                                                                                                                       |                                                                                                 |       |
|--|--|--|--------------------------------------------------------------------------------------------------------------------------------------|------------------------------------------------------------------------------------------------------------------------------------------|---------------------------------------------------------------------------------------------------------------------------------------|-------------------------------------------------------------------------------------------------|-------|
|  |  |  | <i>Diplogasteroides</i> sp.<br>(Diplogastridae)<br>[FL]                                                                              | (CM)<br>[ <i>Musca domestica</i> L.<br>(Insecta: Diptera:<br>Tachinidae) eggs]                                                           | Predation rate of <i>M. domestica</i> eggs decreased 57% with the presence of the nematode                                            | Lab                                                                                             | [280] |
|  |  |  | <i>Diplogaster</i><br>sp. (Diplogastridae)<br>[FL]                                                                                   | (C)<br>[ <i>Panagrolaimus</i> sp.<br>(Panagrolaimidae),<br><i>Rhabditella leptura</i><br>(Cobb) Chitwood<br>(Rhabditidae)]               | 2.2 eggs/female/ day on a fly larval media substrate<br><br>Daile oviposition ½ the oviposition with <i>R. leptura</i>                | Lab                                                                                             | [156] |
|  |  |  | <i>Haematozoon subulatum</i><br>Leisering, 1865 (= <i>Rhitis inermiformis</i> (Osche, 1952) Andrassy, 1983)<br>(Rhabditidae)<br>[FL] | -                                                                                                                                        | Reared from larva to adult. Reproduction occurred.                                                                                    | Lab                                                                                             | [171] |
|  |  |  | <i>Meloidogyne javanica</i><br>(Treub) Chitwood<br>(Meloidogynidae) J2<br>[PP]                                                       | -                                                                                                                                        | Reduction of <i>M. javanica</i> population with released with <i>Parasitus fimetorum</i> (Berlese) (Acari: Mesostigmata: Parasitidae) | Lab<br>Greenhouse:<br>Pots with tomato ( <i>Solanum lycopersicum</i> L. (Solanaceae)) seedlings | [281] |
|  |  |  | <i>Panagrellus redivivus</i><br>(Linnaeus)<br>(Panagrolaimidae)<br>[FL]                                                              | -                                                                                                                                        | Aggregation in pits of nematodes and active feeding                                                                                   | Lab                                                                                             | [175] |
|  |  |  | <i>Panagrolaimus</i> sp.<br>(Panagrolaimidae)<br>[FL]                                                                                | (C)<br>[ <i>Diplogaster</i> sp. (Nematoda: Diplogastridae),<br><i>Rhabditella leptura</i><br>(Cobb) Chitwood<br>(Nematoda: Rhabditidae)] | Similar to <i>Diplogaster</i> sp. (~2.2 eggs/female/ day)                                                                             | Lab                                                                                             | [156] |

|  |  |  |                                                                                         |                                                                                                                                                                                                                                       |                                                                                                                                                                                                                                                                              |     |           |
|--|--|--|-----------------------------------------------------------------------------------------|---------------------------------------------------------------------------------------------------------------------------------------------------------------------------------------------------------------------------------------|------------------------------------------------------------------------------------------------------------------------------------------------------------------------------------------------------------------------------------------------------------------------------|-----|-----------|
|  |  |  | <i>Pelodera teres</i> Schneider (= <i>Rhabditis teres</i> (Schneider) Bütschli)<br>[FL] | -                                                                                                                                                                                                                                     | Aggregation in pits of nematodes and active feeding                                                                                                                                                                                                                          | Lab | [175]     |
|  |  |  | <i>Protorhabditis</i> sp.<br>(Rhabditidae)<br>[FL]                                      | (M)<br>[ <i>Musca domestica</i> L.<br>(Insecta: Diptera: Tachinidae) frozen eggs]                                                                                                                                                     | Production of up to ~72 mites/female on a diet of nematodes and <i>M. domestica</i> frozen eggs at 30°C                                                                                                                                                                      | Lab | [282]     |
|  |  |  | <i>Rhabditella leptura</i> (Cobb)<br>Chitwood (Rhabditidae)<br>[FL]                     | (C)<br>[ <i>Diplogaster</i> sp. (Nematoda: Diplogastridae),<br><i>Panagrolaimus</i> sp. (Nematoda: Panagrolaimidae),<br><i>Musca domestica</i> Linnaeus (Insecta: Diptera: Tachinidae) eggs]<br>(M)<br>[eggs of <i>M. domestica</i> ] | 4.8 – 15.57 eggs/female/day<br><br>Daily oviposition 2.2x higher than with other nematodes<br><br>Daily oviposition 6% higher when fly eggs are combined with nematodes than with nematodes alone.<br><br>Adults prefer <i>M. domestica</i> eggs; immatures prefer nematodes | Lab | [156,157] |
|  |  |  |                                                                                         | (M)<br>[ <i>Musca domestica</i> L.<br>(Insecta: Diptera: Tachinidae)]                                                                                                                                                                 | Reared with nematodes + housefly eggs                                                                                                                                                                                                                                        | Lab | [176]     |
|  |  |  | <i>Rhabditella axei</i> (Cobbold) (= <i>Rhabditis elongata</i> (A.                      | -                                                                                                                                                                                                                                     | Aggregation in pits of nematodes and active feeding                                                                                                                                                                                                                          | Lab | [175]     |

|  |  |  |                                                                                                  |                                                                                                                                                                                                                             |                                                                                                                                                                                                                                                             |       |       |
|--|--|--|--------------------------------------------------------------------------------------------------|-----------------------------------------------------------------------------------------------------------------------------------------------------------------------------------------------------------------------------|-------------------------------------------------------------------------------------------------------------------------------------------------------------------------------------------------------------------------------------------------------------|-------|-------|
|  |  |  | Schneider) Bütschli)<br>(Rhabditidae)<br>[FL]                                                    | (CM)<br>[ <i>Musca domestica</i> L.<br>(Insecta: Diptera:<br>Tachinidae) eggs]                                                                                                                                              | Control of <i>M. domestica</i><br>decreased 11% with high<br>densities of nematodes.<br><br>Higher reproduction only<br>with nematodes compared<br>with <i>M. domestica</i> eggs.<br>Slightly higher with <i>M.</i><br><i>domestica</i> eggs +<br>nematodes | Lab   | [154] |
|  |  |  | (C)<br>[ <i>Musca domestica</i> L.<br>(Insecta: Diptera:<br>Tachinidae) eggs and<br>L1]          | Female adults prefer <i>M.</i><br><i>domestica</i><br><br>Inmatures preferred<br>nematodes                                                                                                                                  | Lab                                                                                                                                                                                                                                                         | [158] |       |
|  |  |  | (C)<br>[ <i>Musca domestica</i> L.<br>(Insecta: Diptera:<br>Tachinidae) live and<br>frozen eggs] | ~40 offspring/ 5 females/ 7<br>days<br><br>Oviposition of 5 females<br>fed on nematodes/7 days<br>~1/4 oviposition females<br>fed on <i>M. domestica</i> eggs                                                               | Lab                                                                                                                                                                                                                                                         | [151] |       |
|  |  |  | Unidentified nematode<br>(Rhabditidae)<br>[FL]                                                   | (C)<br>[ <i>Enchytraeus albidus</i><br>Henle (Annelida:<br>Clitellata:<br>Enchytraeidae), <i>Musca</i><br><i>domestica</i> L. (Insecta:<br>Diptera: Tachinidae)<br>eggs, unidentified<br>Collembola,<br>unidentified yeast] | 43.17 eggs/5 females/7<br>days<br><br>Fecundity 3.2 x lower than<br>with the <i>M. domestica</i> eggs                                                                                                                                                       | Lab   | [150] |

|  |  |                                     |                                                                                             |                                                              |                                                                                                                                                                                  |      |       |
|--|--|-------------------------------------|---------------------------------------------------------------------------------------------|--------------------------------------------------------------|----------------------------------------------------------------------------------------------------------------------------------------------------------------------------------|------|-------|
|  |  |                                     | Unidentified nematode (Rhabditidae) [FL]                                                    | (M) [Musca domestica L. (Insecta: Diptera: Tachinidae) eggs] | 16.75 – 17.25 offspring (eggs+larvae)/30 females/3 hours                                                                                                                         | Lab  | [279] |
|  |  |                                     | Unidentified nematode (Rhabditidae) [FL]                                                    | (M) [Musca domestica L. (Insecta: Diptera: Tachinidae) eggs] | $r_m = 0.73 - 0.91$ (M. domestica eggs + nematodes)                                                                                                                              | Lab  | [283] |
|  |  |                                     | Unidentified nematode (Rhabditidae) [FL]                                                    | (M) [Musca domestica L. (Insecta: Diptera: Tachinidae) eggs] | 9.06 (at 34°C) – 19.65 (at 28°C) eggs/female/day (M. domestica eggs + nematodes)<br><br>Fecundity = 73.8 (at 34°C) – 161.5 (at 28°C) eggs/female (M. domestica eggs + nematodes) | Lab  | [284] |
|  |  | Macrocheles novaezelandiae Emberson | Mix of Panagrellus silusiae (de Man) (Panagrolaimidae) and Rhabditis sp. (Rhabditidae) [FL] | -                                                            | -                                                                                                                                                                                | Lab  | [160] |
|  |  | Macrocheles n. sp.                  | Unidentified nematode [possibly FL]                                                         | -                                                            | Reared from larva to adult                                                                                                                                                       | Lab? | [97]  |



|  |  |                                              |                                                       |                                                                                                                                                                                                                                                                                    |                                                                                                                                |     |       |
|--|--|----------------------------------------------|-------------------------------------------------------|------------------------------------------------------------------------------------------------------------------------------------------------------------------------------------------------------------------------------------------------------------------------------------|--------------------------------------------------------------------------------------------------------------------------------|-----|-------|
|  |  | <i>Macrocheles</i> n. sp.                    | <i>Aphelenchus</i> sp.<br>(Aphelenchidae)<br>[FL]     | (C)<br>[ <i>Mesaphorura silvicola</i><br>(Folsom) (= <i>Tullbergia granulata</i> Mills)<br>(Collembola:<br>Tullbergiidae),<br><i>Oppiella</i> (O.) <i>nova</i><br>(Oudemans) (Acari:<br>Sarcoptiformes:<br>Oppidae)<br><i>Panagrolaimus</i> sp.<br>(Nematoda:<br>Panagrolaimidae)] | Devel. time = $4.1 \pm 0.5$ days<br><br>Oviposition occurred<br><br>Developmental time<br>shorter than with<br>Collembola      | Lab | [130] |
|  |  |                                              | <i>Panagrolaimus</i> sp.<br>(Panagrolaimidae)<br>[FL] | (C)<br>[ <i>Aphelenchus</i> sp.<br>(Nematoda:<br>Aphelenchidae),<br><i>Mesaphorura silvicola</i><br>(Folsom) (= <i>Tullbergia granulata</i> Mills)<br>(Collembola:<br>Tullbergiidae),<br><i>Oppiella</i> (O.) <i>nova</i><br>(Oudemans) (Acari:<br>Sarcoptiformes:<br>Oppidae)]    | Devel. time = $3.7 \pm 0.4$ days<br><br>Oviposition occurred<br><br>Developmental time<br>shorter than with the other<br>preys | Lab | [130] |
|  |  | <i>Macrocheles parapisentii</i><br>Costa     | <i>Panagrellus</i> sp.<br>(Panagrolaimidae)<br>[FL]   | -                                                                                                                                                                                                                                                                                  | Reared from larva to adult<br><br>Reproduction occurred                                                                        | Lab | [285] |
|  |  | <i>Macrocheles penicilliger</i><br>(Berlese) | <i>Panagrellus</i> sp.<br>(Panagrolaimidae)<br>[FL]   | (M)<br>[ <i>Lucilia</i> sp. (Diptera:<br>Calliphoridae), <i>Musca vetustissima</i> Walker<br>(Diptera: Tachinidae)]                                                                                                                                                                | Reared                                                                                                                         | Lab | [273] |

|  |                                                    |  |                                                                                                           |                                                                                                                                                                                              |                                                                                                                                                 |     |       |
|--|----------------------------------------------------|--|-----------------------------------------------------------------------------------------------------------|----------------------------------------------------------------------------------------------------------------------------------------------------------------------------------------------|-------------------------------------------------------------------------------------------------------------------------------------------------|-----|-------|
|  |                                                    |  | Unidentified nematode (Rhabditidae) [FL]                                                                  | (M)<br>[ <i>Musca domestica</i> L. (Insecta: Diptera: Tachinidae) eggs]                                                                                                                      | $r_m = 0.28 - 0.32$ ( <i>M. domestica</i> eggs + nematodes)                                                                                     | Lab | [283] |
|  | <i>Macrocheles peniculatus</i> Berlese             |  | <i>Panagrellus</i> sp. (Panagrolaimidae) [FL]                                                             | (M)<br>[ <i>Lucilia</i> sp. (Diptera: Calliphoridae), <i>Musca vetustissima</i> Walker (Diptera: Tachinidae)]                                                                                | Reared                                                                                                                                          | Lab | [273] |
|  |                                                    |  | Unidentified nematode (Rhabditidae) [FL]                                                                  | (C)<br>[ <i>Enchytraeus albidus</i> Henle (Annelida: Clitellata: Enchytraeidae), <i>Musca domestica</i> L. (Insecta: Diptera: Tachinidae) eggs, unidentified Collembola, unidentified yeast] | 24.5 eggs/5 females/8 days<br><br>Fecundity 3.8 x lower than with the <i>M. domestica</i> eggs, but 11.3 – 5.4 higher than with the other preys | Lab | [150] |
|  |                                                    |  | Unidentified nematode (Rhabditidae) [FL]                                                                  | (M)<br>[ <i>Musca domestica</i> L. (Insecta: Diptera: Tachinidae) eggs]                                                                                                                      | 11.25 – 16.25 offspring (eggs+larvae)/30 females/3 hours                                                                                        | Lab | [279] |
|  |                                                    |  | Unidentified nematode (Rhabditidae) [FL]                                                                  | (M)<br>[ <i>Musca domestica</i> L. (Insecta: Diptera: Tachinidae) eggs]                                                                                                                      | $r_m = 0.49 - 0.56$ ( <i>M. domestica</i> eggs + nematodes)                                                                                     | Lab | [283] |
|  | <i>Macrocheles perglaber</i> Filipponi & Pegazzano |  | <i>Haematozoon subulatum</i> Leisering (= <i>Rhitis inermiformis</i> (Osche) Andr ssy) (Rhabditidae) [FL] | -                                                                                                                                                                                            | Reared from larva to adult. Reproduction occurred.                                                                                              | Lab | [171] |

|  |  |                                                                                        |                                                                                                           |                                                                                                                                                                                              |                                                                                                                                                  |     |               |
|--|--|----------------------------------------------------------------------------------------|-----------------------------------------------------------------------------------------------------------|----------------------------------------------------------------------------------------------------------------------------------------------------------------------------------------------|--------------------------------------------------------------------------------------------------------------------------------------------------|-----|---------------|
|  |  |                                                                                        | Unidentified nematode (Rhabditidae) [FL]                                                                  | (C)<br>[ <i>Enchytraeus albidus</i> Henle (Annelida: Clitellata: Enchytraeidae), <i>Musca domestica</i> L. (Insecta: Diptera: Tachinidae) eggs, unidentified Collembola, unidentified yeast] | 48.17 eggs/5 females/11 days<br><br>Fecundity 1.5 x lower than with the <i>M. domestica</i> eggs, but 8.3 –20.7 higher than with the other preys | Lab | [150]         |
|  |  |                                                                                        | Unidentified nematode (Rhabditidae) [FL]                                                                  | (M)<br>[ <i>Musca domestica</i> L. (Insecta: Diptera: Tachinidae) eggs]                                                                                                                      | 6 – 9.75 offspring (eggs+larvae)/30 females/3 hours                                                                                              | Lab | [279]         |
|  |  | <i>Macrocheles pisentii</i> (Berlese)                                                  | <i>Haematozoon subulatum</i> Leisering (= <i>Rhitis inermiformis</i> (Osche) Andrassy) (Rhabditidae) [FL] | -                                                                                                                                                                                            | Reared from larva to adult<br>Reproduction occurred.                                                                                             | Lab | [171]         |
|  |  |                                                                                        | Mix of unidentified nematode (Rhabditida) and <i>Radopholus similis</i> (Cobb) Thorne [FL, PP]            | -                                                                                                                                                                                            | Reared from larva to adult                                                                                                                       | Lab | [286]<br>xvii |
|  |  | <i>Macrocheles robustulus</i> (Berlese) (= <i>Macrocheles punctillatus</i> (Willmann)) | <i>Panagrellus</i> sp. (Panagrolaimidae) [FL]                                                             | -                                                                                                                                                                                            | Reared from larva to adult                                                                                                                       | Lab | [287]         |
|  |  |                                                                                        | <i>Panagrellus</i> sp. (Panagrolaimidae) [FL]                                                             | (M)<br>[ <i>Lucilia</i> sp. (Diptera: Calliphoridae), <i>Musca vetustissima</i> Walker (Diptera: Tachinidae)]                                                                                | Reared                                                                                                                                           | Lab | [273]         |

|  |  |                                 |                                                                                                                              |                                                                                                                                                                                                                             |                                                                                                                                                                                                            |     |       |
|--|--|---------------------------------|------------------------------------------------------------------------------------------------------------------------------|-----------------------------------------------------------------------------------------------------------------------------------------------------------------------------------------------------------------------------|------------------------------------------------------------------------------------------------------------------------------------------------------------------------------------------------------------|-----|-------|
|  |  |                                 | <i>Rhabditis</i> sp. (Rhabditidae)<br>[FL]                                                                                   | (C)<br>[ <i>Musca domestica</i> L.<br>(Insecta: Diptera:<br>Tachinidae) eggs and<br>larvae]                                                                                                                                 | 0.48 eggs/female/day<br><br>Fecundity: 14.4<br>eggs/female<br><br>Fecundity 1.7x lower than<br>with <i>M. domestica</i> eggs<br><br>Adults prefer <i>M. domestica</i><br>eggs over larvae and<br>nematodes | Lab | [153] |
|  |  |                                 | <i>Rhabditis</i> sp. (Rhabditidae)<br>[FL]                                                                                   | (M)<br>[ <i>Enchytraeus albidus</i><br>Henle (Annelida:<br>Clitellata:<br>Enchytraeidae)]                                                                                                                                   | Reared (nematodes +<br>enchytraeids)                                                                                                                                                                       | Lab | [271] |
|  |  |                                 | Unidentified nematode<br>(Rhabditidae)<br>[FL]                                                                               | (C)<br>[ <i>Enchytraeus albidus</i><br>Henle (Annelida:<br>Clitellata:<br>Enchytraeidae), <i>Musca</i><br><i>domestica</i> L. (Insecta:<br>Diptera: Tachinidae)<br>eggs, unidentified<br>Collembola,<br>unidentified yeast] | 63 eggs/5 females/12 days<br><br>Fecundity 1.6 x higher<br>than with the <i>M. domestica</i><br>eggs                                                                                                       | Lab | [150] |
|  |  |                                 | Unidentified nematode<br>[possibly FL]                                                                                       | (C) <sup>xviii</sup><br>[Dipteran larvae<br>(Insecta: Diptera),<br>unidentified<br>Collembola]                                                                                                                              | Dipteran larvae preferred                                                                                                                                                                                  | Lab | [152] |
|  |  | <i>Macrocheles saceri</i> Costa | <i>Haematozoon subulatum</i><br>Leisering (= <i>Rhitis</i><br><i>inermiformis</i> (Osche)<br>Andrássy) (Rhabditidae)<br>[FL] | -                                                                                                                                                                                                                           | Reared from larva to<br>adult. Reproduction<br>occurred.                                                                                                                                                   | Lab | [171] |

|  |  |                                     |                                                                                                                                                                                                                                                                                     |                                                                                                                                                                                                                                                                                                                                          |                                                                                                      |     |     |
|--|--|-------------------------------------|-------------------------------------------------------------------------------------------------------------------------------------------------------------------------------------------------------------------------------------------------------------------------------------|------------------------------------------------------------------------------------------------------------------------------------------------------------------------------------------------------------------------------------------------------------------------------------------------------------------------------------------|------------------------------------------------------------------------------------------------------|-----|-----|
|  |  | <i>Macrocheles schaeferi</i> Walter | Mix of <i>Acrobelloides</i> spp. (Cephalobidae), <i>Aphelenchoides</i> sp. (Aphelenchoididae), and <i>Aphelenchus avenae</i> Bastian (Aphelenchidae), <i>Panagrolaimus</i> sp. (Panagrolaimidae) [FL]                                                                               | -                                                                                                                                                                                                                                                                                                                                        | Reared                                                                                               | Lab | [7] |
|  |  |                                     | Mix of <i>Aphelenchus</i> sp. (Aphelenchidae), <i>Panagrolaimus</i> sp. (Panagrolaimidae) [FL]                                                                                                                                                                                      | (C) [ <i>Cosmolaelaps vacuus</i> (Michael) (= <i>Hypoaspis</i> ( <i>Cosmolaelaps</i> ) <i>vacua</i> (Michael)) (Acari: Mesostigmata: Laelapidae), <i>Mesaphorura silvicola</i> (Folsom) (= <i>Tullbergia granulata</i> Mills) (Collembola: Tullbergiidae), <i>Oppiella</i> (O.) <i>nova</i> (Oudemans) (Acari: Sarcoptiformes: Oppidae)] | Devel. time = $3.8 \pm 0.4$ days<br><br>Shorter development time with arthropods than with nematodes | Lab | [7] |
|  |  |                                     | Mix of <i>Panagrolaimus</i> sp. (Panagrolaimidae), <i>Acrobelloides nanus</i> (de Man) Anderson (= <i>Cephalobus nanus</i> ) and <i>Acrobelloides</i> spp. (Cephalobidae), <i>Aphelenchoides</i> sp. (Aphelenchoididae), and <i>Aphelenchus avenae</i> Bastian (Aphelenchidae) [FL] | -                                                                                                                                                                                                                                                                                                                                        | Reared from larva to adult                                                                           | Lab | [6] |

|  |  |                                           |                                                                                                                              |                                                                                                                                                                                                                             |                                                                                                         |     |       |
|--|--|-------------------------------------------|------------------------------------------------------------------------------------------------------------------------------|-----------------------------------------------------------------------------------------------------------------------------------------------------------------------------------------------------------------------------|---------------------------------------------------------------------------------------------------------|-----|-------|
|  |  | <i>Macrocheles scutatus</i><br>(Berlese)  | Unidentified nematode<br>(Rhabditidae)<br>[FL]                                                                               | (C)<br>[ <i>Enchytraeus albidus</i><br>Henle (Annelida:<br>Clitellata:<br>Enchytraeidae), <i>Musca</i><br><i>domestica</i> L. (Insecta:<br>Diptera: Tachinidae)<br>eggs, unidentified<br>Collembola,<br>unidentified yeast] | 117.17 eggs/5 females/13<br>days<br><br>Fecundity 15 x higher than<br>with the <i>M. domestica</i> eggs | Lab | [150] |
|  |  | <i>Macrocheles</i> sp.                    | <i>Cephalobus</i><br>sp. (Cephalobidae)<br>[FL]                                                                              | -                                                                                                                                                                                                                           | -                                                                                                       | Lab | [115] |
|  |  | <i>Macrocheles spiculatus</i><br>Halliday | Mix of <i>Panagrellus silusiae</i><br>(de Man)<br>(Panagrolaimidae) and<br><i>Rhabditis</i><br>sp. (Rhabditidae)<br>[FL]     | -                                                                                                                                                                                                                           | -                                                                                                       | Lab | [160] |
|  |  | <i>Macrocheles subbadius</i><br>(Berlese) | <i>Haematozoon subulatum</i><br>Leisering (= <i>Rhitis</i><br><i>inermiformis</i> (Osche)<br>Andrássy) (Rhabditidae)<br>[FL] | -                                                                                                                                                                                                                           | Reared from larva to<br>adult. Reproduction<br>occurred.                                                | Lab | [171] |
|  |  |                                           | <i>Panagrellus</i> sp.<br>(Panagrolaimidae)<br>[FL]                                                                          | (M)<br>[ <i>Lucilia</i> sp. (Diptera:<br>Calliphoridae), <i>Musca</i><br><i>vetustissima</i> Walker<br>(Diptera: Tachinidae)]                                                                                               | Reared                                                                                                  | Lab | [273] |
|  |  |                                           | <i>Rhabditella leptura</i> (Cobb)<br>Chitwood (Rhabditidae)<br>[FL]                                                          | -                                                                                                                                                                                                                           | Reared                                                                                                  | Lab | [278] |

|  |              |                                                                                    |                                                                                                           |                                                                                                               |                                                                                                                                                                                               |     |       |
|--|--------------|------------------------------------------------------------------------------------|-----------------------------------------------------------------------------------------------------------|---------------------------------------------------------------------------------------------------------------|-----------------------------------------------------------------------------------------------------------------------------------------------------------------------------------------------|-----|-------|
|  |              |                                                                                    | Unidentified nematode (Rhabditidae) [FL]                                                                  | (M)<br>[ <i>Musca domestica</i> L.<br>(Insecta: Diptera: Tachinidae) eggs]                                    | 0.75 – 3.25 offspring (eggs+larvae)/30 females/3 hours                                                                                                                                        | Lab | [279] |
|  |              |                                                                                    | Unidentified nematode (Rhabditidae) [FL]                                                                  | (M)<br>[ <i>Musca domestica</i> L.<br>(Insecta: Diptera: Tachinidae) eggs]                                    | $r_m = 0.68 - 0.86$ ( <i>M. domestica</i> eggs + nematodes)                                                                                                                                   | Lab | [283] |
|  |              | <i>Macrocheles vernalis</i> (Berlese)                                              | <i>Haematozoon subulatum</i> Leisering (= <i>Rhitis inermiformis</i> (Osche) Andr ssy) (Rhabditidae) [FL] | -                                                                                                             | Reared from larva to adult. Reproduction occurred.                                                                                                                                            | Lab | [171] |
|  |              | <i>Macrocheles virgo</i> Halliday                                                  | <i>Panagrellus</i> sp. (Panagrolaimidae) [FL]                                                             | (M)<br>[ <i>Lucilia</i> sp. (Diptera: Calliphoridae), <i>Musca vetustissima</i> Walker (Diptera: Tachinidae)] | Reared                                                                                                                                                                                        | Lab | [273] |
|  |              | <i>Nothrholaspis carinatus</i> (Koch) (= <i>Macrocheles carinatus</i> (Koch))      | <i>Rhabditis</i> sp. (Rhabditidae) [FL]                                                                   | (C)<br>[ <i>Musca domestica</i> L.<br>(Insecta: Diptera: Tachinidae) eggs and larvae]                         | 0.29 eggs/female/day<br><br>Fecundity: 8.1 eggs/female<br><br>Fecundity 1.6x lower than with <i>M. domestica</i> eggs<br><br>Adults prefer <i>M. domestica</i> eggs over larvae and nematodes | Lab | [153] |
|  | Melicharidae | <i>Proctolaelaps aurora</i> (Vitzthum) (= <i>Proctolaelaps longipilis</i> (Chant)) | <i>Rhabditis</i> sp. (Rhabditidae) [FL]                                                                   | -                                                                                                             | Reproduction occurred                                                                                                                                                                         | Lab | [134] |

|  |  |                                                                                                                    |                                                                                                             |                                                                                                                                                                                                                                                                                                              |                                                                                                                                                                                                               |     |                                |
|--|--|--------------------------------------------------------------------------------------------------------------------|-------------------------------------------------------------------------------------------------------------|--------------------------------------------------------------------------------------------------------------------------------------------------------------------------------------------------------------------------------------------------------------------------------------------------------------|---------------------------------------------------------------------------------------------------------------------------------------------------------------------------------------------------------------|-----|--------------------------------|
|  |  | <i>Proctolaelaps bickleyi</i> (Bram)                                                                               | Unidentified nematode [FL]                                                                                  | (C)<br>[ <i>Aspergillus niger</i> Tiegh. (Ascomycota: Aspergillaceae),<br><i>Botrytis fabae</i> Sardiña (Pezizomycotina: Sclerotiniaceae),<br><i>Rhizoctonia solani</i> Kühn (Cantharellales: Ceratobasidiaceae)]                                                                                            | Devel. time = female: 5.39 ± 0.18 days; male: 4.73 ± 0.14 days<br><br>1.08 eggs/female/day<br>Fecundity = 13.06 ± 2.82 eggs/female<br><br>Fecundity 2.13 – 2.9x higher than with the fungi                    | Lab | [288]                          |
|  |  | <i>Proctolaelaps deleoni</i> Nawar, Childers & Abou-Setta                                                          | <i>Mesorhabditis scanica</i> (Allgén) (= <i>Rhabditis scanica</i> Allgé) (Rhabditidae) [FL]                 | (C)<br>[ <i>Aspergillus flavus</i> Link (Eurotiales: Aspergillaceae),<br><i>Fusarium oxysporum</i> Schltdl. (Hypocreales: Nectriaceae),<br><i>Rhizoglyphus robini</i> Claparede (Acari: Sarcoptiformes: Astigmatina: Acaridae), <i>Tyrophagus putrescentiae</i> (Schrank) (Acari: Sarcoptiformes: Acaridae)] | Devel. time = 2.4 – 8.9 days<br><br>Fecundity: 28.8 eggs/female at 28°C<br><br>Not oviposition with <i>F. oxysporum</i> and <i>A. flavus</i> .<br>Not feeding on <i>R. robini</i> and <i>T. putrescentiae</i> | Lab | [289]                          |
|  |  | <i>Proctolaelaps dendroctoni</i> Lindquist & Hunter                                                                | Mix of <i>Rhabditis</i> sp. (Rhabditidae) and <i>Cryptaphelenchus</i> sp. (Aphelenchoididae) [FL]           | -                                                                                                                                                                                                                                                                                                            | Devel. time = 144 – 122 hours<br><br>1.15 ± 0.05 eggs/female/day                                                                                                                                              | Lab | [290]                          |
|  |  | <i>Proctolaelaps fiseri</i> Samšičák (= <i>Lasioseius hystrix</i> Vitzthum; misidentification, according to [291]) | Unidentified nematodes associated to <i>Ips typographus</i> (L.) (Insecta: Coleoptera) [Possibly FL and AP] | -                                                                                                                                                                                                                                                                                                            | -                                                                                                                                                                                                             | Lab | [292]<br>xix<br>cited by [293] |



|  |  |                                                                                                            |                                                                                                                                                                                                      |                                                                                            |                                                                                                                                                               |     |             |
|--|--|------------------------------------------------------------------------------------------------------------|------------------------------------------------------------------------------------------------------------------------------------------------------------------------------------------------------|--------------------------------------------------------------------------------------------|---------------------------------------------------------------------------------------------------------------------------------------------------------------|-----|-------------|
|  |  | <i>Proctolaelaps</i> nr. <i>jueradeus</i> (Schweizer)                                                      | Mix of <i>Acrobeloides</i> spp. (Cephalobidae), <i>Aphelenchoides</i> sp. (Aphelenchoididae), and <i>Aphelenchus avenae</i> Bastian (Aphelenchidae), <i>Panagrolaimus</i> sp. (Panagrolaimidae) [FL] | -                                                                                          | -                                                                                                                                                             | Lab | [7]         |
|  |  | <i>Proctolaelaps</i> nr. <i>lewisi</i> (Garman & McGregor) (= <i>Proctolaelaps</i> aff. <i>utahensis</i> ) | Unidentified nematode associated with fungus [possibly FL]                                                                                                                                           | -                                                                                          | -                                                                                                                                                             | Lab | [294]<br>xx |
|  |  | <i>Proctolaelaps pygmaeus</i> (Müller)                                                                     | <i>Meloidogyne incognita</i> (Kofoed & White) Chitwood (Meloidogynidae) J2 [PP]                                                                                                                      | -                                                                                          | Devel. time = female: 5.3 – 8.0 days; male: 4.6 – 6.8 days<br><br>0.2 – 0.8 eggs/female/day<br><br>Fecundity: 1.8 – 12.4 eggs/female<br>$r_m = 0.023 - 0.266$ | Lab | [295]       |
|  |  |                                                                                                            | <i>Panagrolaimus rigidus</i> (Schneider) (Panagrolaimidae) [FL]                                                                                                                                      | (C) [ <i>Rhizoglyphus robini</i> Claparede (Acari: Sarcoptiformes: Astigmatina: Acaridae)] | Devel. time = 4.24 – 5.21 days<br><br>1.85 eggs/female/day<br>Fecundity = 17.8 eggs/female<br><br>Fecundity 2.8x higher than with <i>R. robini</i>            | Lab | [296]       |
|  |  |                                                                                                            | <i>Rhabditis</i> sp. (Rhabditidae) [FL]                                                                                                                                                              | -                                                                                          | Reproduction occurred                                                                                                                                         | Lab | [134]       |

|  |                |                                                                                    |                                                                                                                                                                                                      |                                                                     |                                                                                                                                                                           |                    |                      |
|--|----------------|------------------------------------------------------------------------------------|------------------------------------------------------------------------------------------------------------------------------------------------------------------------------------------------------|---------------------------------------------------------------------|---------------------------------------------------------------------------------------------------------------------------------------------------------------------------|--------------------|----------------------|
|  |                | <i>Proctolaelaps rotundus</i> Hirschmann (= <i>Lasioseius rotundus</i> Hirschmann) | Unidentified nematodes associated to <i>Ips typographus</i> (L.) (Insecta: Coleoptera) [Possibly FL and AP]                                                                                          | -                                                                   | -                                                                                                                                                                         | Lab                | [292] cited by [293] |
|  |                | <i>Proctolaelaps</i> sp.                                                           | Unidentified nematodes [possibly FL and AP]                                                                                                                                                          | -                                                                   | -                                                                                                                                                                         | Field: Observation | [293]                |
|  |                | <i>Proctolaelaps</i> sp.                                                           | <i>Rhabditolaimus</i> sp. (= <i>Cylindrocorpus</i> sp.) (Diplogastridae) [FL]                                                                                                                        | -                                                                   | -                                                                                                                                                                         | Lab?               | [262]<br>xxi         |
|  |                | <i>Proctolaelaps subcorticalis</i> Lindquist                                       | <i>Rhabditis</i> sp. (Rhabditidae) [FL]                                                                                                                                                              | (C) [ <i>Fusarium oxysporum</i> Schltdl. (Ascomycota: Nectriaceae)] | Devel. time = female: 7.53 ± 0.81 days; male: 7.25 ± 0.82 days<br><br>0.84 eggs/female/day<br><br>Daily oviposition slightly higher (1.09x) than with <i>F. oxysporum</i> | Lab                | [297]                |
|  | Neoparasitidae | <i>Neoparasitus</i> sp.                                                            | <i>Cephalobus</i> sp. (Cephalobidae) [FL]                                                                                                                                                            | -                                                                   | -                                                                                                                                                                         | Lab                | [115]                |
|  | Ologamasidae   | <i>Acugamasus montanus</i> (Willmann) (= <i>Gamasellus</i> nr. <i>montanus</i> )   | Mix of <i>Acrobeloides</i> spp. (Cephalobidae), <i>Aphelenchoides</i> sp. (Aphelenchoididae), and <i>Aphelenchus avenae</i> Bastian (Aphelenchidae), <i>Panagrolaimus</i> sp. (Panagrolaimidae) [FL] | -                                                                   | -                                                                                                                                                                         | Lab                | [7]                  |
|  |                |                                                                                    |                                                                                                                                                                                                      |                                                                     |                                                                                                                                                                           |                    |                      |

|  |  |                                       |                                                                                                           |   |   |     |       |
|--|--|---------------------------------------|-----------------------------------------------------------------------------------------------------------|---|---|-----|-------|
|  |  | <i>Antennolaelaps</i> n. sp. 2        | Mix of <i>Panagrellus silusiae</i> (de Man) (Panagrolaimidae) and <i>Rhabditis</i> sp. (Rhabditidae) [FL] | - | - | Lab | [160] |
|  |  | <i>Athiasella dentata</i> (Womersley) | <i>Rhabditis</i> sp. (Rhabditidae) [FL]                                                                   | - | - | Lab | [159] |
|  |  |                                       | Mix of <i>Panagrellus silusiae</i> (de Man) (Panagrolaimidae) and <i>Rhabditis</i> sp. (Rhabditidae) [FL] | - | - | Lab | [160] |
|  |  | <i>Athiasella</i> n. sp. 3            | Mix of <i>Panagrellus silusiae</i> (de Man) (Panagrolaimidae) and <i>Rhabditis</i> sp. (Rhabditidae) [FL] | - | - | Lab | [160] |
|  |  | <i>Athiasella</i> n. sp. 7            | Mix of <i>Panagrellus silusiae</i> (de Man) (Panagrolaimidae) and <i>Rhabditis</i> sp. (Rhabditidae) [FL] | - | - | Lab | [160] |
|  |  | <i>Athiasella</i> n. sp. 18           | Mix of <i>Panagrellus silusiae</i> (de Man) (Panagrolaimidae) and <i>Rhabditis</i> sp. (Rhabditidae) [FL] | - | - | Lab | [160] |

|  |  |                                                        |                                                                                                                          |   |   |     |       |
|--|--|--------------------------------------------------------|--------------------------------------------------------------------------------------------------------------------------|---|---|-----|-------|
|  |  | <i>Caliphis novaezelandiae</i><br>(Womersley)          | Mix of <i>Panagrellus silusiae</i><br>(de Man)<br>(Panagrolaimidae) and<br><i>Rhabditis</i><br>sp. (Rhabditidae)<br>[FL] | - | - | Lab | [160] |
|  |  | <i>Caliphis queenslandicus</i><br>(Womersley)          | Mix of <i>Panagrellus silusiae</i><br>(de Man)<br>(Panagrolaimidae) and<br><i>Rhabditis</i><br>sp. (Rhabditidae)<br>[FL] | - | - | Lab | [160] |
|  |  | <i>Caliphis</i> n. sp. nr<br><i>queenslandicus</i>     | Mix of <i>Panagrellus silusiae</i><br>(de Man)<br>(Panagrolaimidae) and<br><i>Rhabditis</i><br>sp. (Rhabditidae)<br>[FL] | - | - | Lab | [160] |
|  |  | <i>Euepicrius</i> n. sp. 10                            | Mix of <i>Panagrellus silusiae</i><br>(de Man)<br>(Panagrolaimidae) and<br><i>Rhabditis</i><br>sp. (Rhabditidae)<br>[FL] | - | - | Lab | [160] |
|  |  | <i>Gamasellus</i> n. sp. nr<br><i>discutatus</i> (Lee) | Mix of <i>Panagrellus silusiae</i><br>(de Man)<br>(Panagrolaimidae) and<br><i>Rhabditis</i><br>sp. (Rhabditidae)<br>[FL] | - | - | Lab | [160] |
|  |  | <i>Gamasellus</i> sp.                                  | <i>Cephalobus</i><br>sp. (Cephalobidae)<br>[FL]                                                                          | - | - | Lab | [115] |

|  |  |                                                               |                                                                                                                 |   |   |     |       |
|--|--|---------------------------------------------------------------|-----------------------------------------------------------------------------------------------------------------|---|---|-----|-------|
|  |  | N. gen. nr <i>Gamasellus</i> sp.                              | Mix of <i>Panagrellus silusiae</i> (de Man)<br>(Panagrolaimidae) and <i>Rhabditis</i> sp. (Rhabditidae)<br>[FL] | - | - | Lab | [160] |
|  |  | <i>Gamasiphis</i> sp.                                         | <i>Cephalobus</i> sp. (Cephalobidae)<br>[FL]                                                                    | - | - | Lab | [115] |
|  |  | <i>Gamasiphis</i> n. sp. nr <i>forficatus</i>                 | Mix of <i>Panagrellus silusiae</i> (de Man)<br>(Panagrolaimidae) and <i>Rhabditis</i> sp. (Rhabditidae)<br>[FL] | - | - | Lab | [160] |
|  |  | <i>Gamasiphis</i> nr <i>australicus</i><br>Womersley n. sp. 1 | Mix of <i>Panagrellus silusiae</i> (de Man)<br>(Panagrolaimidae) and <i>Rhabditis</i> sp. (Rhabditidae)<br>[FL] | - | - | Lab | [160] |
|  |  | <i>Gamasiphis</i> nr <i>australicus</i><br>Womersley n. sp. 5 | Mix of <i>Panagrellus silusiae</i> (de Man)<br>(Panagrolaimidae) and <i>Rhabditis</i> sp. (Rhabditidae)<br>[FL] | - | - | Lab | [160] |
|  |  | <i>Gamasiphis</i> nr <i>australicus</i><br>Womersley n. sp. 6 | Mix of <i>Panagrellus silusiae</i> (de Man)<br>(Panagrolaimidae) and <i>Rhabditis</i> sp. (Rhabditidae)<br>[FL] | - | - | Lab | [160] |

|  |                 |                                                                                  |                                                                                                                |                                                                                                          |                                                                   |                               |                |
|--|-----------------|----------------------------------------------------------------------------------|----------------------------------------------------------------------------------------------------------------|----------------------------------------------------------------------------------------------------------|-------------------------------------------------------------------|-------------------------------|----------------|
|  |                 | <i>Geogamasus</i> n. sp. 3                                                       | Mix of <i>Panagrellus silusiae</i> (de Man) (Panagrolaimidae) and <i>Rhabditis</i> sp. (Rhabditidae) [FL]      | -                                                                                                        | -                                                                 | Lab                           | [160]          |
|  |                 | <i>Heydeniella</i> sp.                                                           | <i>Cephalobus</i> sp. (Cephalobidae) [FL]                                                                      | -                                                                                                        | -                                                                 | Lab                           | [115]          |
|  |                 | <i>Hydrogamasus giardi</i> (Berlese & Trouessart)                                | Unidentified nematode [possibly FL]                                                                            | -                                                                                                        | -                                                                 | Lab<br>Field:<br>Observations | [298]<br>xxii  |
|  |                 | <i>Hydrogamasus salinus</i> (Laboulb.)                                           | Unidentified nematode [possibly FL]                                                                            | -                                                                                                        | -                                                                 | Lab<br>Field:<br>Observations | [298]<br>xxiii |
|  |                 | <i>Hydrogamasus</i> sp.                                                          | <i>Cephalobus</i> sp. (Cephalobidae) [FL]                                                                      | -                                                                                                        | -                                                                 | Lab                           | [115]          |
|  |                 | <i>Laelaptiella anomala</i> Womersley                                            | Mix of <i>Panagrellus silusiae</i> (de Man) (Panagrolaimidae) and <i>Rhabditis</i> sp. (Rhabditidae) [FL]      | -                                                                                                        | -                                                                 | Lab                           | [160]          |
|  |                 | <i>Queenslandolaelaps</i> n. sp. I                                               | Mix of <i>Panagrellus silusiae</i> (de Man) (Panagrolaimidae) and <i>Rhabditis Cephasp.</i> (Rhabditidae) [FL] | -                                                                                                        | -                                                                 | Lab                           | [160]          |
|  | Pachylaelapidae | <i>Onchodellus anovillosus</i> (Berlese) (= <i>Pachylaelaps hispani</i> Berlese) | <i>Panagrellus</i> sp. (Panagrolaimidae) [FL]                                                                  | (C) <sup>xxiv</sup><br>[ <i>Tyrophagus putrescentiae</i> (Schränk)<br>(Acari: Sarcoptiformes: Acaridae)] | <i>T. putrescentiae</i> was not consumed by <i>O. anovillosus</i> | Lab                           | [299]          |

|  |                 |                                                                                        |                                                                                                                                                                                                   |                                                                              |                                                                          |                   |                                               |
|--|-----------------|----------------------------------------------------------------------------------------|---------------------------------------------------------------------------------------------------------------------------------------------------------------------------------------------------|------------------------------------------------------------------------------|--------------------------------------------------------------------------|-------------------|-----------------------------------------------|
|  |                 | <i>Pachylaelaps bellicosus</i> Berlese                                                 | Unidentified nematode [possibly FL]                                                                                                                                                               | -                                                                            | -                                                                        | Lab               | [243]                                         |
|  |                 | <i>Pachylaelaps pectinifer</i> (Canestrini)                                            | Unidentified nematode [possibly FL]                                                                                                                                                               | (C) [unidentified Collembola, unidentified Acaridae (Acari: Sarcoptiformes)] | Addition of nematodes increased the population more than with other prey | Lab               | [173]                                         |
|  |                 | <i>Pachylaelaps</i> sp.                                                                | <i>Cephalobus</i> sp. (Cephalobidae) [FL]                                                                                                                                                         | -                                                                            | -                                                                        | Lab               | [115]                                         |
|  |                 | <i>Pachyseius humeralis</i> Berlese                                                    | Unidentified nematode [possibly FL]                                                                                                                                                               | -                                                                            | -                                                                        | Lab               | [243]                                         |
|  | Parholaspididae | <i>Parholaspulus alstoni</i> Evans                                                     | <i>Cephalobus</i> sp. (Cephalobidae) [FL]                                                                                                                                                         | -                                                                            | -                                                                        | Lab               | [115]                                         |
|  |                 | <i>Parholaspus ochraeus</i> (Ishikawa)                                                 | Unidentified nematodes [possibly FL]                                                                                                                                                              | -                                                                            | -                                                                        | Lab: Observation? | [300]                                         |
|  | Parasitidae     | <i>Eugamasus</i> sp.                                                                   | <i>Cephalobus</i> sp. (Cephalobidae) [FL]                                                                                                                                                         | -                                                                            | -                                                                        | Lab               | [115]                                         |
|  |                 | <i>Eugamasus</i> sp. (probably <i>Schizothetus</i> Athias-Henriot, according to [301]) | Unidentified nematodes in galleries of <i>Dendroctonus frontalis</i> Zimmermann, <i>Ips calligraphus</i> (Germar) and <i>Ips avulsus</i> Wood & Bright (Insecta: Coleoptera) [possibly FL and AP] | NA                                                                           | NA                                                                       | NA                | [302]<br><small>xxv</small><br>cited by [293] |

|  |  |                                                                      |                                                                                                                                                                                      |                                                                                                            |                                                                                                                                                                                                                                                                             |     |       |
|--|--|----------------------------------------------------------------------|--------------------------------------------------------------------------------------------------------------------------------------------------------------------------------------|------------------------------------------------------------------------------------------------------------|-----------------------------------------------------------------------------------------------------------------------------------------------------------------------------------------------------------------------------------------------------------------------------|-----|-------|
|  |  | <i>Paragamasus runcatellus</i> (A.Berlese) (=Pergamasus runcatellus) | Mix of nematodes, mainly <i>Pratylenchus</i> (Pratylenchidae), <i>Paratylenchus</i> (Tylenchulidae), <i>Tylenchorhynchus</i> (Dolichodoridae), and saprophagous Tylenchidae [FL, PP] | -                                                                                                          | -                                                                                                                                                                                                                                                                           | Lab | [139] |
|  |  | <i>Parasitus bituberosus</i> Karg                                    | Unidentified nematode [possibly FL]                                                                                                                                                  | -                                                                                                          | -                                                                                                                                                                                                                                                                           | Lab | [303] |
|  |  |                                                                      | Mix of unidentified compost nematodes [FL]                                                                                                                                           | -                                                                                                          | -                                                                                                                                                                                                                                                                           | Lab | [304] |
|  |  |                                                                      | <i>Rhabditella axei</i> (Cobbold) (Rhabditidae) [FL]                                                                                                                                 | (CM) [ <i>Frankliniella occidentalis</i> (Pergande) (Insecta: Thysanoptera: Thripidae) pupae and prepupae] | Nematode: $10.9 \pm 1.5$ eggs/female/day<br>Nem. + other prey: $15.0 \pm 1.8$ eggs/female/day<br><br>Daily oviposition 1.2x higher than with the other prey alone.<br><br>Daily oviposition 1.4x higher when the prey is combined with nematodes than with nematodes alone. | Lab | [22]  |



|  |  |                                                                           |                                                                                                                                                                                                                              |                                                                                                                                                                                                                                                                                                          |                                                                                                                                                  |     |       |
|--|--|---------------------------------------------------------------------------|------------------------------------------------------------------------------------------------------------------------------------------------------------------------------------------------------------------------------|----------------------------------------------------------------------------------------------------------------------------------------------------------------------------------------------------------------------------------------------------------------------------------------------------------|--------------------------------------------------------------------------------------------------------------------------------------------------|-----|-------|
|  |  |                                                                           | <i>Rhabditis</i> sp. (Rhabditidae)<br>[FL]                                                                                                                                                                                   | (C)<br>[ <i>Lycoriella ingenua</i><br>Dufour (Insecta:<br>Diptera: Sciaridae),<br><i>Megaselia halterata</i><br>(Wood) (Insecta:<br>Diptera: Phoridae),<br>and <i>Pediculaster<br/>mesembrinae</i><br>(Canestrini) (= <i>Pediculaster<br/>mesembrinae</i> ) (Acari:<br>Trombidiformes:<br>Siteroptidae)] | 10.4 ± 4.2 eggs/female/ day<br>Devel. time female = 6.1 ±<br>1.0 days<br><br>Daily oviposition 2.5 - 1.2x<br>higher than with the other<br>preys | Lab | [166] |
|  |  | <i>Paragamasus</i> sp.                                                    | Mix of <i>Acrobeloides</i> spp.<br>(Cephalobidae),<br><i>Aphelenchoides</i> sp.<br>(Aphelenchoididae), and<br><i>Aphelenchus avenae</i> Bastian<br>(Aphelenchidae),<br><i>Panagrolaimus</i> sp.<br>(Panagrolaimidae)<br>[FL] | -                                                                                                                                                                                                                                                                                                        | Reared                                                                                                                                           | Lab | [7]   |
|  |  | <i>Parasitus coleoptratorum</i> (L.)<br>(= <i>Eugamasus celer</i> (Koch)) | Unidentified nematode<br>[possibly FL]                                                                                                                                                                                       | -                                                                                                                                                                                                                                                                                                        | -                                                                                                                                                | Lab | [243] |
|  |  |                                                                           | Unidentified nematode<br>[possibly FL]                                                                                                                                                                                       | -                                                                                                                                                                                                                                                                                                        | -                                                                                                                                                | Lab | [152] |
|  |  | <i>Parasitus copridis</i> Costa, 1963                                     | <i>Panagrellus</i> sp.<br>(Panagrolaimidae)<br>[FL]                                                                                                                                                                          | -                                                                                                                                                                                                                                                                                                        | 33 - 43 eggs/female                                                                                                                              | Lab | [305] |

|  |  |                                                                                     |                                                                                                                        |                                                                                                                                                                                                                                                                                                             |                                                                                                                                                                        |                                                                                                                    |               |
|--|--|-------------------------------------------------------------------------------------|------------------------------------------------------------------------------------------------------------------------|-------------------------------------------------------------------------------------------------------------------------------------------------------------------------------------------------------------------------------------------------------------------------------------------------------------|------------------------------------------------------------------------------------------------------------------------------------------------------------------------|--------------------------------------------------------------------------------------------------------------------|---------------|
|  |  | <i>Parasitus fimetorum</i> (Berlese)<br>(= <i>Eugamasus fimetorum</i><br>(Berlese)) | <i>Meloidogyne javanica</i><br>(Treub) Chitwood<br>(Meloidogynidae) J2<br>[PP]                                         | -                                                                                                                                                                                                                                                                                                           | Reduction of <i>M. javanica</i><br>population with released<br>with <i>Macrocheles</i><br><i>muscaedomesticae</i> (Scopoli)<br>(Acari: Mesostigmata:<br>Macrochelidae) | Lab<br>Greenhouse:<br>Pots with tomato<br>( <i>Solanum</i><br><i>lycopersicum</i> L.<br>(Solanaceae))<br>seedlings | [281]         |
|  |  |                                                                                     | Unidentified nematode<br>[possibly FL]                                                                                 | (C) <sup>xxvi</sup><br>[ <i>Drosophila</i> larvae<br>(Insecta: Diptera:<br>Drosophilidae),<br>cooked potatoes,<br>Enchytraeidae<br>(Annelida: Clitellata),<br><i>Folsomia</i> sp.,<br><i>Onychiurus</i> sp. and<br><i>Tullbergia</i> sp.<br>(Collembola:<br>Isotomidae,<br>Onychiuridae,<br>Tullbergiidae)] | Nematodes and dipteran<br>larvae preferred                                                                                                                             | Lab                                                                                                                | [152]         |
|  |  |                                                                                     | Unidentified nematode<br>[possibly FL]                                                                                 | -                                                                                                                                                                                                                                                                                                           | -                                                                                                                                                                      | Lab                                                                                                                | [241,2<br>42] |
|  |  | <i>Parasitus furcatus</i><br>(G.Canestrini &<br>R.Canestrini)                       | Unidentified nematode<br>[possibly FL]                                                                                 | -                                                                                                                                                                                                                                                                                                           | -                                                                                                                                                                      | Lab                                                                                                                | [243]         |
|  |  | <i>Parasitus gregarious</i> Ito                                                     | <i>Rhabditella axei</i> (Cobbold)<br>(= <i>Rhabditis elongate</i> (A.<br>Schneider) Bütschli)<br>(Rhabditidae)<br>[FL] | (C)<br>[ <i>Musca domestica</i> L.<br>(Insecta: Diptera:<br>Tachinidae) eggs and<br>L1]                                                                                                                                                                                                                     | Deutonymph preferred<br>nematodes over <i>M.</i><br><i>domestica</i> larvae                                                                                            | Lab                                                                                                                | [158]         |

|  |  |                                                                                    |                                                                                                                     |                                                                                                                                                                                                                                                                                                              |                                                           |     |       |
|--|--|------------------------------------------------------------------------------------|---------------------------------------------------------------------------------------------------------------------|--------------------------------------------------------------------------------------------------------------------------------------------------------------------------------------------------------------------------------------------------------------------------------------------------------------|-----------------------------------------------------------|-----|-------|
|  |  | <i>Parasitus mustelarum</i><br>Oudemans (= <i>Eugamasus mustelarum</i> (Oudemans)) | Unidentified nematode<br>[possibly FL]                                                                              | (C) <sup>xxvii</sup><br>[ <i>Drosophila</i> larvae<br>(Insecta: Diptera:<br>Drosophilidae),<br>cooked potatoes,<br>Enchytraeidae<br>(Annelida: Clitellata),<br><i>Folsomia</i> sp.,<br><i>Onychiurus</i> sp. and<br><i>Tullbergia</i> sp.<br>(Collembola:<br>Isotomidae,<br>Onychiuridae,<br>Tullbergiidae)] | Nematodes preferred                                       | Lab | [152] |
|  |  |                                                                                    | Unidentified nematode<br>[possibly FL]                                                                              | -                                                                                                                                                                                                                                                                                                            | -                                                         | Lab | [243] |
|  |  | <i>Parasitus</i> sp.                                                               | <i>Aphelenchus avenae</i> Bastian<br>(Aphelenchidae)<br>[FL]                                                        | -                                                                                                                                                                                                                                                                                                            | Aggregation in pits of<br>nematodes and active<br>feeding | Lab | [175] |
|  |  |                                                                                    | <i>Aphelenchoides composticola</i><br>Franklin<br>(Aphelenchoididae)<br>[FL]                                        | -                                                                                                                                                                                                                                                                                                            | Aggregation in pits of<br>nematodes and active<br>feeding | Lab | [175] |
|  |  |                                                                                    | <i>Panagrellus redivivus</i><br>(Linnaeus)<br>(Panagrolaimidae)<br>[FL]                                             | -                                                                                                                                                                                                                                                                                                            | Aggregation in pits of<br>nematodes and active<br>feeding | Lab | [175] |
|  |  |                                                                                    | <i>Pelodera teres</i> Schneider (= <i>Rhabditis teres</i> (Schneider) Bütschli)<br>[FL]                             | -                                                                                                                                                                                                                                                                                                            | Aggregation in pits of<br>nematodes and active<br>feeding | Lab | [175] |
|  |  |                                                                                    | <i>Rhabditella axei</i> (Cobbold)<br>(= <i>Rhabditis elongate</i> (A. Schneider) Bütschli)<br>(Rhabditidae)<br>[FL] | -                                                                                                                                                                                                                                                                                                            | Aggregation in pits of<br>nematodes and active<br>feeding | Lab | [175] |

|  |  |                                                   |                                                                                                                                                                                                                              |   |        |     |       |
|--|--|---------------------------------------------------|------------------------------------------------------------------------------------------------------------------------------------------------------------------------------------------------------------------------------|---|--------|-----|-------|
|  |  | <i>Parasitus</i> sp.                              | <i>Cephalobus</i> sp. (Cephalobidae)<br>[FL]                                                                                                                                                                                 | - | -      | Lab | [115] |
|  |  | <i>Pergamasus brevicornis</i> Berlese             | Unidentified nematode<br>[possibly FL]                                                                                                                                                                                       | - | -      | Lab | [243] |
|  |  | <i>Pergamasus</i> nr. <i>crassipes</i> (Linnaeus) | <i>Steinernema feltiae</i> (Filipjev)<br>Wouts, Mráček, Gerdin & Bedding<br>(Steinernematidae)<br>[AP]                                                                                                                       | - | -      | Lab | [112] |
|  |  |                                                   | Mix of <i>Acrobeloides</i> spp.<br>(Cephalobidae),<br><i>Aphelenchoides</i> sp.<br>(Aphelenchoididae), and<br><i>Aphelenchus avenae</i> Bastian<br>(Aphelenchidae),<br><i>Panagrolaimus</i> sp.<br>(Panagrolaimidae)<br>[FL] | - | Reared | Lab | [7]   |

|  |  |                                              |                                                                                                |                                                                                                                                                                                                                                                                                                                                                                                                                                              |                                                                                                               |     |       |
|--|--|----------------------------------------------|------------------------------------------------------------------------------------------------|----------------------------------------------------------------------------------------------------------------------------------------------------------------------------------------------------------------------------------------------------------------------------------------------------------------------------------------------------------------------------------------------------------------------------------------------|---------------------------------------------------------------------------------------------------------------|-----|-------|
|  |  |                                              | Mix of <i>Aphelenchus</i> sp. (Aphelenchidae), <i>Panagrolaimus</i> sp. (Panagrolaimidae) [FL] | (C) [Gymnodamaeus sp. (Acari: Sarcoptiformes: Gymnodamaeida), <i>Mesaphorura silvicola</i> (Folsom) (= <i>Tullbergia granulata</i> Mills) (Collembola: Tullbergiidae), <i>Oppiella</i> (O.) <i>nova</i> (Oudemans) (Acari: Sarcoptiformes: Oppidae), <i>Pilogalumna</i> sp. (Acari: Sarcoptiformes: Galumnidae), <i>Polyxenus</i> sp. (Diplododa: Polyxenidae), <i>Tyrophagus putrescentiae</i> (Schrank) (Acari: Sarcoptiformes: Acaridae)] | Devel. time = $9.8 \pm 1.2$ days<br><br>Slightly shorter development time with nematodes than with arthropods | Lab | [7]   |
|  |  | <i>Pergamasus septentrionalis</i> (Oudemans) | <i>Acrobeloides buetschlii</i> (de Man) Steiner & Buhrer [FL]                                  | -                                                                                                                                                                                                                                                                                                                                                                                                                                            | Nematode DNA detected in predator gut                                                                         | Lab | [102] |
|  |  |                                              | <i>Panagrellus redivivus</i> (Linnaeus) (Panagrolaimidae) [FL]                                 | -                                                                                                                                                                                                                                                                                                                                                                                                                                            | Nematode DNA detected in predator gut                                                                         | Lab | [102] |

|  |              |                                                      |                                                                                                                                   |                                                                                                                                                                                                         |                                                                                                                                                                                               |       |                 |
|--|--------------|------------------------------------------------------|-----------------------------------------------------------------------------------------------------------------------------------|---------------------------------------------------------------------------------------------------------------------------------------------------------------------------------------------------------|-----------------------------------------------------------------------------------------------------------------------------------------------------------------------------------------------|-------|-----------------|
|  |              |                                                      | <i>Pellioiditis hermaphrodita</i> (Schneider) (= <i>Phasmarhabditis hermaphrodita</i> (A. Schneider) Andrassy) (Rhabditidae) [AP] | -                                                                                                                                                                                                       | Nematode DNA detected in predator gut                                                                                                                                                         | Field | [100]           |
|  |              |                                                      | <i>Plectus</i> spp. (Plectidae) [FL]                                                                                              | -                                                                                                                                                                                                       | Nematode DNA detected in predator gut                                                                                                                                                         | Field | [101]           |
|  |              |                                                      | <i>Plectus velox</i> Bastian (Plectidae) [FL]                                                                                     | -                                                                                                                                                                                                       | Nematode DNA detected in predator gut                                                                                                                                                         | Lab   | [102]           |
|  |              |                                                      | <i>Steinernema feltiae</i> (Filipjev) Wouts, Mráček, Gerdin & Bedding (Steinernematidae) [AP]                                     | -                                                                                                                                                                                                       | Nematode DNA detected in predator gut                                                                                                                                                         | Field | [100]           |
|  |              | <i>Porrhostaspis lunulata</i> Müller                 | <i>Rhabditis</i> sp. (Rhabditidae) [FL]                                                                                           | (C) [ <i>Lepidocyrtus</i> sp. (Collembola: Entomobryidae), <i>Musca domestica</i> L. (Insecta: Diptera: Tachinidae), <i>Rhizoglyphus echinopus</i> (Fumouze & Robin) (Acari: Sarcoptiformes: Acaridae)] | 0.63 eggs/female/ day<br><br>Daily oviposition 5.2 - 7.9x higher than with <i>R. echinopus</i> and <i>Lepidocyrtus</i> sp., but 1.7 - 2.2x less than with <i>M. domestica</i> larvae and eggs | Lab   | [167]           |
|  |              | <i>Schizosthetus lyriformis</i> (McGraw and Farrier) | Unidentified nematode [possibly FL]                                                                                               | -                                                                                                                                                                                                       | -                                                                                                                                                                                             | Lab   | [244]<br>xxviii |
|  | Phytoseiidae | <i>Amblyseius</i> sp.                                | <i>Cephalobus</i> sp. (Cephalobidae) [FL]                                                                                         | -                                                                                                                                                                                                       | -                                                                                                                                                                                             | Lab   | [115]           |
|  |              | <i>Amblyseius</i> spp.                               | Unidentified nematode [possibly FL]                                                                                               | -                                                                                                                                                                                                       | Infrequent feeding                                                                                                                                                                            | Lab?  | [97]            |

|  |  |                                                     |                                                                                                                                                                                                      |                                                                                                                                                                                                                                           |                                                                                                                                                 |     |               |
|--|--|-----------------------------------------------------|------------------------------------------------------------------------------------------------------------------------------------------------------------------------------------------------------|-------------------------------------------------------------------------------------------------------------------------------------------------------------------------------------------------------------------------------------------|-------------------------------------------------------------------------------------------------------------------------------------------------|-----|---------------|
|  |  |                                                     | Mix of <i>Acrobeloides</i> spp. (Cephalobidae), <i>Aphelenchoides</i> sp. (Aphelenchoididae), and <i>Aphelenchus avenae</i> Bastian (Aphelenchidae), <i>Panagrolaimus</i> sp. (Panagrolaimidae) [FL] | -                                                                                                                                                                                                                                         | Reared                                                                                                                                          | Lab | [7]           |
|  |  | <i>Macroseius biscutatus</i> Chant, Denmark & Baker | <i>Panagrellus redivivus</i> (Linnaeus) (Panagrolaimidae) [FL]                                                                                                                                       | (C) [ <i>Panagrolaimus</i> sp. (Nematoda: Panagrolaimidae), <i>Sarraceniopus hughesi</i> (Hunter & Hunter) (Acari: Sarcoptiformes: Histiotomatidae), Collembola, insect frass fragments, litter, leaf cups, Noctuid frass]                | Devel. time = 18.06 days<br><br>Reproduction occurred (comparable with <i>Panagrolaimus</i> sp. and <i>S. hughesi</i> ). Not with other diets.  | Lab | [306]<br>xxix |
|  |  |                                                     | <i>Panagrolaimus</i> sp. (Panagrolaimidae) [FL]                                                                                                                                                      | (C) [ <i>Panagrellus redivivus</i> (Linnaeus) (Nematoda: Panagrolaimidae), <i>Sarraceniopus hughesi</i> (Hunter & Hunter) (Acari: Sarcoptiformes: Histiotomatidae), Collembola, insect frass fragments, litter, leaf cups, Noctuid frass] | Devel. time = 11.6 - 12.8 days<br><br>Reproduction occurred (comparable with <i>P. redivivus</i> and <i>S. hughesi</i> ). Not with other diets. | Lab | [306]         |

|  |             |                                                                                                  |                                                                                                                                                                                                                                                                                   |   |                                      |      |       |
|--|-------------|--------------------------------------------------------------------------------------------------|-----------------------------------------------------------------------------------------------------------------------------------------------------------------------------------------------------------------------------------------------------------------------------------|---|--------------------------------------|------|-------|
|  |             | <i>Neoseiulus</i> nr. <i>brevispinus</i> (Kennett) (= <i>Amblyseius</i> nr. <i>brevispinus</i> ) | Mix of <i>Acrobeloides</i> spp. (Cephalobidae), <i>Aphelenchoides</i> sp. (Aphelenchoididae), and <i>Aphelenchus avenae</i> Bastian (Aphelenchidae), <i>Panagrolaimus</i> sp. (Panagrolaimidae) [FL]                                                                              | - | Reared                               | Lab  | [7]   |
|  |             |                                                                                                  | Mix of <i>Panagrolaimus</i> sp. (Panagrolaimidae), <i>Acrobeloides nanus</i> (de Man) Anderson (= <i>Cephalobus nanus</i> ) and <i>Acrobeloides</i> spp. (Cephalobidae), <i>Aphelenchoides</i> sp. (Aphelenchoididae), and <i>Aphelenchus avenae</i> Bastian (Aphelenchidae) [FL] | - | Reared from larva to adult           | Lab  | [6]   |
|  |             |                                                                                                  | Unidentified nematode [possibly FL]                                                                                                                                                                                                                                               | - | Reared from larva to adult           | Lab? | [97]  |
|  |             | <i>Neoseiulus setulus</i> (Fox)                                                                  | <i>Steinernema feltiae</i> (Filipjev) Wouts, Mráček, Gerdin & Bedding (Steinernematidae) [AP]                                                                                                                                                                                     | - | Reared only from larva to protonymph | Lab  | [112] |
|  | Podocinidae | <i>Podocinum catenum</i> Ishikawa                                                                | <i>Cephalobus</i> sp. (Cephalobidae) [FL]                                                                                                                                                                                                                                         | - | -                                    | Lab  | [115] |
|  |             | <i>Podocinum</i> sp. 1                                                                           | Mix of <i>Panagrellus silusiae</i> (de Man) (Panagrolaimidae) and <i>Rhabditis</i> sp. (Rhabditidae) [FL]                                                                                                                                                                         | - | -                                    | Lab  | [160] |



|  |              |                                                                                               |                                                                                                                                                                                                                                                                                   |   |                                                                       |     |       |
|--|--------------|-----------------------------------------------------------------------------------------------|-----------------------------------------------------------------------------------------------------------------------------------------------------------------------------------------------------------------------------------------------------------------------------------|---|-----------------------------------------------------------------------|-----|-------|
|  | Rhodacaridae | Unidentified species of Rhodacaridae                                                          | Unidentified nematodes [possibly FL]                                                                                                                                                                                                                                              | - | Drastic reduction in nematodes number                                 | Lab | [231] |
|  |              | <i>Afrodacarellus</i> sp.                                                                     | <i>Radopholus similis</i> (Cobb) Thorne (= <i>Radopholus citrophilus</i> Huettel, Dickson & Kaplan) [PP]                                                                                                                                                                          | - | -                                                                     | Lab | [94]  |
|  |              | <i>Multidentorhodacarus denticulatus</i> (Berlese) (= <i>Rhodacarus denticulatus</i> Berlese) | <i>Acrobeloides</i> sp. (Cephalobidae) [FL]                                                                                                                                                                                                                                       | - | Egg incubation = $8.8 \pm 0.3$ days                                   | Lab | [59]  |
|  |              |                                                                                               | Mix of <i>Acrobeloides</i> spp. (Cephalobidae), <i>Aphelenchoides</i> sp. (Aphelenchoididae), and <i>Aphelenchus avenae</i> Bastian (Aphelenchidae), <i>Panagrolaimus</i> sp. (Panagrolaimidae) [FL]                                                                              | - | -                                                                     | Lab | [7]   |
|  |              |                                                                                               | Mix of <i>Panagrolaimus</i> sp. (Panagrolaimidae), <i>Acrobeloides nanus</i> (de Man) Anderson (= <i>Cephalobus nanus</i> ) and <i>Acrobeloides</i> spp. (Cephalobidae), <i>Aphelenchoides</i> sp. (Aphelenchoididae), and <i>Aphelenchus avenae</i> Bastian (Aphelenchidae) [FL] | - | -                                                                     | Lab | [6]   |
|  |              |                                                                                               | <i>Radopholus similis</i> (Cobb) Thorne (= <i>Radopholus citrophilus</i> Huettel, Dickson & Kaplan) [PP]                                                                                                                                                                          | - | Devel. time = $26.3 \pm 0.8$ days<br>Hatching success = $56 \pm 13$ % | Lab | [94]  |

|  |  |                                                                                          |                                                                                    |                                                                                                                                                                                                                                                                                                                                                                 |                                                                                                                                                                                                                         |                                                                      |       |
|--|--|------------------------------------------------------------------------------------------|------------------------------------------------------------------------------------|-----------------------------------------------------------------------------------------------------------------------------------------------------------------------------------------------------------------------------------------------------------------------------------------------------------------------------------------------------------------|-------------------------------------------------------------------------------------------------------------------------------------------------------------------------------------------------------------------------|----------------------------------------------------------------------|-------|
|  |  |                                                                                          | <i>Tylenchulus semipenetrans</i> Cobb (Tylenchulidae) [PP]                         | -                                                                                                                                                                                                                                                                                                                                                               | Colonized Citrus nematode culture                                                                                                                                                                                       | Greenhouse: Citrus nematode ( <i>T. semipenetrans</i> ) box cultures | [117] |
|  |  |                                                                                          | Unidentified nematode [possibly FL]                                                | -                                                                                                                                                                                                                                                                                                                                                               | Reared from larva to adult                                                                                                                                                                                              | Lab?                                                                 | [97]  |
|  |  | <i>Protogamasellopsis dioscorus</i> (Manson) (= <i>Protogamasellus dioscorus</i> Manson) | <i>Rhabditella</i> sp. (cited as <i>Rhabditella masculata</i> ) (Rhabditidae) [FL] | (C)<br>[ <i>Aspergillus niger</i> Tiegh. (Ascomycota: Aspergillaceae),<br><i>Fusarium oxysporum</i> Schltdl. (Ascomycota: Nectriaceae), <i>Musca domestica</i> L. (Insecta: Diptera: Tachinidae) larvae, <i>Penicillium notatum</i> Westling (Eurotiales: Aspergillaceae), <i>Rhizoglyphus robini</i> Claparede (Acari: Sarcoptiformes: Astigmatina: Acaridae)] | Devel. time = $7.9 \pm 1.1$ days<br><br>4.2+0.4 eggs/female (at 25°C); 5.3+0.2<br>Fecundity = $61.4 \pm 5.0$ eggs/female (at 25°C); $64.5 \pm 3.2$ (at 30°C)<br><br>Fecundity 1.03 – 26.7x higher than with other preys | Lab                                                                  | [307] |

|  |  |                                                                  |                                                                                                  |                                                                                                                                                                                                                                                        |                                                                                                                                                                                  |     |       |
|--|--|------------------------------------------------------------------|--------------------------------------------------------------------------------------------------|--------------------------------------------------------------------------------------------------------------------------------------------------------------------------------------------------------------------------------------------------------|----------------------------------------------------------------------------------------------------------------------------------------------------------------------------------|-----|-------|
|  |  | <i>Protogamasellopsis posnaniensis</i> Wiśniewski and Hirschmann | <i>Protorhabditis</i> sp. (Rhabditidae) [FL]                                                     | (C) [Bradysia matogrossensis (Lane) (Insecta: Sciaridae), Frankliniella occidentalis (Pergande) (Insecta: Thysanoptera: Thripidae), Rhizoglyphus echinopus (Fumouze & Robin) and Tyrophagus putrescentiae (Schrank) (Acari: Sarcoptiformes) Acaridae)] | Devel. time = $8.6 \pm 0.1$ days.<br>6.3 eggs/female/ day<br><br>Daily oviposition 1.12 - 12.6x higher than with the other preys, except for the case of <i>T. putrescentiae</i> | Lab | [308] |
|  |  | <i>Protogamasellopsis</i> n. sp.                                 | <i>Rhabditis</i> sp. (Rhabditidae) [FL]                                                          | -                                                                                                                                                                                                                                                      | Reproduction occurred                                                                                                                                                            | Lab | [134] |
|  |  | <i>Protogamasellopsis</i> sp.                                    | <i>Radopholus similis</i> (Cobb) Thorne (=Radopholus citrophilus Huettel, Dickson & Kaplan) [PP] | -                                                                                                                                                                                                                                                      | Devel. time = $10.8 \pm 0.1$ days<br>Hatching success = $83 \pm 7$ %                                                                                                             | Lab | [94]  |

|  |  |                                                                    |                                                                                        |                                                                                                                                                                         |                                                                                                                                                                                                                                                                                                                                                                                                                                                    |                         |       |
|--|--|--------------------------------------------------------------------|----------------------------------------------------------------------------------------|-------------------------------------------------------------------------------------------------------------------------------------------------------------------------|----------------------------------------------------------------------------------------------------------------------------------------------------------------------------------------------------------------------------------------------------------------------------------------------------------------------------------------------------------------------------------------------------------------------------------------------------|-------------------------|-------|
|  |  | <i>Protoparasitopsis zaheri</i><br>Abo-Shnaf, Castilho<br>& Moraes | <i>Heterodera glycines</i> Ichinohe<br>(Heteroderidae) eggs, J2<br>and females<br>[PP] | (C)<br>[ <i>Rhabditella axei</i><br>(Cobbold) (Nematoda:<br>Rhabditidae),<br><i>Tyrophagus<br/>putrescentiae</i> (Schrank)<br>(Acari: Sarcoptiformes:<br>Acaridae)]     | Devel. time = $9.1 \pm 0.17$<br>days (fed on eggs); $9.7 \pm$<br>$0.06$ days (fed on J2)<br><br>$0.9 \pm 0.03$ eggs/female/day<br>(fed on female)<br>$2.6 \pm 0.02$ eggs/female/day<br>(fed on eggs)<br>$2.0 \pm 0.03$ eggs/female/day<br>(fed on J2)<br><br>Fecundity = $29.8 \pm 1.26$<br>eggs/female (fed on eggs);<br>$31.1 \pm 1.52$ (fed on J2)<br><br>Daily oviposition higher<br>with <i>R. axei</i> and <i>T.</i><br><i>putrescentiae</i> | Lab                     | [168] |
|  |  |                                                                    | <i>Rhabditella axei</i> (Cobbold)<br>(Rhabditidae)<br>[FL]                             | (C)<br>[ <i>Heterodera glycines</i><br>Ichinohe (Nematoda:<br>Heteroderidae),<br><i>Tyrophagus<br/>putrescentiae</i> (Schrank)<br>(Acari: Sarcoptiformes:<br>Acaridae)] | $3.6 \pm 0.03$ eggs/female/day<br><br>Daily oviposition similar<br>to the mites fed on <i>T. T.</i><br><i>putrescentiae</i> , but 4 – 1.4x<br>higher than with <i>H.</i><br><i>glycines</i>                                                                                                                                                                                                                                                        | Lab                     | [168] |
|  |  | <i>Rhodacarellus calcarulatus</i><br>Berlese                       | Unidentified nematode<br>[possibly FL]                                                 | -                                                                                                                                                                       | -                                                                                                                                                                                                                                                                                                                                                                                                                                                  | Lab                     | [243] |
|  |  |                                                                    | Unidentified nematode<br>[possibly FL]                                                 | -                                                                                                                                                                       | -                                                                                                                                                                                                                                                                                                                                                                                                                                                  | Field:<br>Observations? | [254] |
|  |  | <i>Rhodacarellus silesiacus</i><br>Willmann                        | <i>Acrobeloides</i> sp.<br>(Cephalobidae)<br>[FL]                                      | -                                                                                                                                                                       | 1.2 eggs/female/ day<br>Devel. time = $23.8 \pm 0.5$<br>days                                                                                                                                                                                                                                                                                                                                                                                       | Lab                     | [59]  |

|  |  |  |                                                                                                                                                                                      |                                                                                                                                              |                                                                                                                               |                               |       |
|--|--|--|--------------------------------------------------------------------------------------------------------------------------------------------------------------------------------------|----------------------------------------------------------------------------------------------------------------------------------------------|-------------------------------------------------------------------------------------------------------------------------------|-------------------------------|-------|
|  |  |  | Mix? of saprophagous nematodes and <i>Globodera rostochiensis</i> (Wollenweber) Skarbilovich (= <i>Heterodera rostochiensis</i> Wollenweber) (Heteroderidae) [FL, PP]                | -                                                                                                                                            | 20-fold in a field contaminated with <i>G. rostochiensis</i>                                                                  | Lab<br>Field:<br>Observations | [172] |
|  |  |  | Mix? of saprophagous nematodes and <i>Globodera rostochiensis</i> (Wollenweber) Skarbilovich (= <i>Heterodera rostochiensis</i> Wollenweber) (Heteroderidae) [FL, PP]                | (C)<br>[Juvenile Oribatida (Acari: Sarcoptiformes), unidentified Collembola, unidentified Acaridae (=Tyroglyphidae) (Acari: Sarcoptiformes)] | Mix of Collembola and mites, and nematodes alone consumed<br><br>20-fold in a field contaminated with <i>G. rostochiensis</i> | Lab<br>Field:<br>Observations | [145] |
|  |  |  | Mix of nematodes, mainly <i>Pratylenchus</i> (Pratylenchidae), <i>Paratylenchus</i> (Tylenchulidae), <i>Tylenchorhynchus</i> (Dolichodoridae), and saprophagous Tylenchidae [FL, PP] | -                                                                                                                                            | -                                                                                                                             | Lab                           | [139] |

|  |  |  |                                                                                                                                                                                                                                                                                                     |   |                                                                                         |                                                                                                     |       |
|--|--|--|-----------------------------------------------------------------------------------------------------------------------------------------------------------------------------------------------------------------------------------------------------------------------------------------------------|---|-----------------------------------------------------------------------------------------|-----------------------------------------------------------------------------------------------------|-------|
|  |  |  | Mix of nematodes in field, being the principal ones: <i>Pratylenchus crenatus</i> Loof (Pratylenchidae), <i>Tylenchorhynchus dubius</i> (Bütschli) Filipjev (Dolichodoridae), <i>Paratylenchus</i> sp. (Tylenchulidae), <i>Helicotylenchus</i> sp. (Hoplolaimidae), saprophagous nematodes [FL, PP] | - | significant positive correlation between the density of soil nematodes and mite density | Field: Observations: microplots with fallow soil under ryegrass, <i>Lolium perenne</i> L. (Poaceae) | [309] |
|  |  |  | Mix of <i>Acrobeloides</i> spp. (Cephalobidae), <i>Aphelenchoides</i> sp. (Aphelenchoididae), and <i>Aphelenchus avenae</i> Bastian (Aphelenchidae), <i>Panagrolaimus</i> sp. (Panagrolaimidae) [FL]                                                                                                | - | Reared                                                                                  | Lab                                                                                                 | [7]   |
|  |  |  | Mix of <i>Panagrolaimus</i> sp. (Panagrolaimidae), <i>Acrobeloides nanus</i> (de Man) Anderson (= <i>Cephalobus nanus</i> ) and <i>Acrobeloides</i> spp. (Cephalobidae), <i>Aphelenchoides</i> sp. (Aphelenchoididae), and <i>Aphelenchus avenae</i> Bastian (Aphelenchidae) [FL]                   | - | Reared from larva to adult                                                              | Lab                                                                                                 | [6]   |
|  |  |  | <i>Pelodera strongyloides</i> (Scheider) (Rhabditidae) [FL]                                                                                                                                                                                                                                         | - | Reproduction occurred                                                                   | Lab                                                                                                 | [170] |

|  |  |                                            |                                                                                                                                                                                                                                                                                   |                                                                              |                                                                          |                      |       |
|--|--|--------------------------------------------|-----------------------------------------------------------------------------------------------------------------------------------------------------------------------------------------------------------------------------------------------------------------------------------|------------------------------------------------------------------------------|--------------------------------------------------------------------------|----------------------|-------|
|  |  |                                            | <i>Rhabditis</i> sp. (Rhabditidae) [FL]                                                                                                                                                                                                                                           | -                                                                            | -                                                                        | Lab                  | [170] |
|  |  |                                            | Unidentified nematode [possibly FL]                                                                                                                                                                                                                                               | -                                                                            | -                                                                        | Lab                  | [243] |
|  |  |                                            | Unidentified nematode [possibly FL]                                                                                                                                                                                                                                               | -                                                                            | -                                                                        | Field: Observations? | [254] |
|  |  |                                            | Unidentified nematode [possibly FL]                                                                                                                                                                                                                                               | -                                                                            | Reared from larva to adult                                               | Lab?                 | [97]  |
|  |  |                                            | Unidentified nematode [possibly FL]                                                                                                                                                                                                                                               | (C) [unidentified Collembola, unidentified Acaridae (Acari: Sarcoptiformes)] | Addition of nematodes increased the population more than with other prey | Lab                  | [173] |
|  |  | <i>Rhodacarellus subterraneus</i> Willmann | Mix of <i>Panagrolaimus</i> sp. (Panagrolaimidae), <i>Acrobeloides nanus</i> (de Man) Anderson (= <i>Cephalobus nanus</i> ) and <i>Acrobeloides</i> spp. (Cephalobidae), <i>Aphelenchoides</i> sp. (Aphelenchoididae), and <i>Aphelenchus avenae</i> Bastian (Aphelenchidae) [FL] | -                                                                            | -                                                                        | Lab                  | [6]   |
|  |  |                                            | Mix of <i>Acrobeloides</i> spp. (Cephalobidae), <i>Aphelenchoides</i> sp. (Aphelenchoididae), and <i>Aphelenchus avenae</i> Bastian (Aphelenchidae), <i>Panagrolaimus</i> sp. (Panagrolaimidae) [FL]                                                                              | -                                                                            | Reared                                                                   | Lab                  | [7]   |

|  |  |                                                                                                 |                                                                                                                                                                                                       |                                                                                                                                                                      |                                                                                                                            |                               |       |
|--|--|-------------------------------------------------------------------------------------------------|-------------------------------------------------------------------------------------------------------------------------------------------------------------------------------------------------------|----------------------------------------------------------------------------------------------------------------------------------------------------------------------|----------------------------------------------------------------------------------------------------------------------------|-------------------------------|-------|
|  |  |                                                                                                 | Unidentified nematode<br>[possibly FL]                                                                                                                                                                | -                                                                                                                                                                    | Reared from larva to adult                                                                                                 | Lab?                          | [97]  |
|  |  | <i>Rhodacarellus</i> sp.                                                                        | <i>Acrobeloides</i> sp.<br>(Cephalobidae)<br>[FL]                                                                                                                                                     | -                                                                                                                                                                    | Egg incubation = 8.8 ± 0.3<br>days                                                                                         | Lab                           | [59]  |
|  |  | <i>Rhodacarus clavulatus</i><br>Athias-Henriot 1961 (= <i>Rhodacarus ancorae</i> Karg,<br>1971) | Unidentified nematode<br>[possibly FL]                                                                                                                                                                | -                                                                                                                                                                    | -                                                                                                                          | Field:<br>Observations?       | [254] |
|  |  | <i>Rhodacarus roseus</i><br>Oudemans                                                            | Mix? of saprophagous<br>nematodes and <i>Globodera</i><br><i>rostochiensis</i> (Wollenweber)<br>Skarbilovich (= <i>Heterodera</i><br><i>rostochiensis</i> Wollenweber)<br>(Heteroderidae)<br>[FL, PP] | -                                                                                                                                                                    | -                                                                                                                          | Lab                           | [172] |
|  |  |                                                                                                 | Mix? of saprophagous<br>nematodes and <i>Globodera</i><br><i>rostochiensis</i> (Wollenweber)<br>Skarbilovich (= <i>Heterodera</i><br><i>rostochiensis</i> Wollenweber)<br>(Heteroderidae)<br>[FL, PP] | (C)<br>[Juvenile Oribatida<br>(Acari:<br>Sarcoptiformes),<br>unidentified<br>Collembola,<br>unidentified Acaridae<br>(=Tyroglyphidae)<br>(Acari:<br>Sarcoptiformes)] | Mix of Collembola and<br>mites preferred<br><br>Predominated in an<br>uncontaminated field with<br><i>G. rostochiensis</i> | Lab                           | [145] |
|  |  |                                                                                                 | <i>Tylenchorhynchus dubius</i><br>(Bütschli) (Dolichodoridae)<br>[PP]                                                                                                                                 | -                                                                                                                                                                    | Multiplication of mites<br>and reduction of<br>nematodes                                                                   | Glasshouse: Potted<br>grasses | [138] |
|  |  |                                                                                                 |                                                                                                                                                                                                       | -                                                                                                                                                                    | Possible suppression of<br>nematodes                                                                                       | Glasshouse: Potted<br>pea     | [139] |
|  |  |                                                                                                 | <i>Rotylenchus</i> sp.<br>(Hoplolaimidae)<br>[PP]                                                                                                                                                     | -                                                                                                                                                                    | Reared from larva to adult                                                                                                 | Lab                           | [139] |



|  |            |                                                                                     |                                                                                                                                                                                                      |   |                                                                    |                            |              |
|--|------------|-------------------------------------------------------------------------------------|------------------------------------------------------------------------------------------------------------------------------------------------------------------------------------------------------|---|--------------------------------------------------------------------|----------------------------|--------------|
|  |            |                                                                                     | Mix of nematodes, mainly <i>Pratylenchus</i> (Pratylenchidae), <i>Paratylenchus</i> (Tylenchulidae), <i>Tylenchorhynchus</i> (Dolichodoridae), and saprophagous Tylenchidae [FL, PP]                 | - | Reared from larva to adult                                         | Lab                        | [139]        |
|  |            |                                                                                     | <i>Rhabditis</i> sp. (Rhabditidae) [FL]                                                                                                                                                              | - | Reproduction occurred                                              | Lab                        | [170]        |
|  |            |                                                                                     | <i>Pelodera strongyloides</i> (Scheider) (Rhabditidae) [FL]                                                                                                                                          | - | Reproduction occurred                                              | Lab                        | [170]        |
|  |            |                                                                                     | Unidentified nematode [possibly FL]                                                                                                                                                                  | - | -                                                                  | Field: Observations?       | [254]        |
|  | Veigaiidae | <i>Cyrrhydraelaps hirtus</i> Berlese                                                | Unidentified nematode [possibly FL]                                                                                                                                                                  | - | -                                                                  | Lab                        | [298]<br>xxx |
|  |            | <i>Veigaia</i> sp.                                                                  | Unidentified nematode [possibly FL]                                                                                                                                                                  | - | Infrequent feeding                                                 | Lab?                       | [97]         |
|  |            |                                                                                     | Mix of <i>Acrobeloides</i> spp. (Cephalobidae), <i>Aphelenchoides</i> sp. (Aphelenchoididae), and <i>Aphelenchus avenae</i> Bastian (Aphelenchidae), <i>Panagrolaimus</i> sp. (Panagrolaimidae) [FL] | - | Infrequent feeding, Preference for arthropods                      | Lab                        | [7]          |
|  | Zerconidae | Mix of <i>Parazercon radiatus</i> (Berlese) and <i>Zercon zelawaiensis</i> Sellnick | Mix of <i>Aphelenchoides</i> spp. (Aphelenchoididae) and <i>Acrobeloides</i> spp. (Cephalobidae) [FL]                                                                                                | - | Lowest population of nematodes in the presence of Zerconidae mites | Lab: Microcosms experiment | [174]        |

|                             |               |                                                                             |                                                                                                                                                                                                      |   |        |     |       |
|-----------------------------|---------------|-----------------------------------------------------------------------------|------------------------------------------------------------------------------------------------------------------------------------------------------------------------------------------------------|---|--------|-----|-------|
|                             |               | <i>Mixozercon</i> sp.                                                       | Mix of <i>Acrobeloides</i> spp. (Cephalobidae), <i>Aphelenchoides</i> sp. (Aphelenchoididae), and <i>Aphelenchus avenae</i> Bastian (Aphelenchidae), <i>Panagrolaimus</i> sp. (Panagrolaimidae) [FL] | - | Reared | Lab | [7]   |
|                             |               | <i>Prozercon</i> sp.                                                        | <i>Cephalobus</i> sp. (Cephalobidae) [FL]                                                                                                                                                            | - | -      | Lab | [115] |
|                             |               | <i>Skeironozzercon tricavus</i> Blaszk (= <i>Skeironozzercon tricazus</i> ) | Mix of <i>Acrobeloides</i> spp. (Cephalobidae), <i>Aphelenchoides</i> sp. (Aphelenchoididae), and <i>Aphelenchus avenae</i> Bastian (Aphelenchidae), <i>Panagrolaimus</i> sp. (Panagrolaimidae) [FL] | - | Reared | Lab | [7]   |
|                             |               | <i>Zercon</i> sp.                                                           | Mix of <i>Acrobeloides</i> spp. (Cephalobidae), <i>Aphelenchoides</i> sp. (Aphelenchoididae), and <i>Aphelenchus avenae</i> Bastian (Aphelenchidae), <i>Panagrolaimus</i> sp. (Panagrolaimidae) [FL] | - | -      | Lab | [7]   |
| Mesostigmata (Microgyniina) | Nothogyniidae | <i>Nothogynus klompeni</i> Walter & Krantz                                  | Mix of <i>Panagrellus silusiae</i> (de Man) (Panagrolaimidae) and <i>Rhabditis</i> sp. (Rhabditidae) [FL]                                                                                            | - | -      | Lab | [160] |

|                          |               |                                                                               |                                                                                                           |   |                                                                         |                            |       |
|--------------------------|---------------|-------------------------------------------------------------------------------|-----------------------------------------------------------------------------------------------------------|---|-------------------------------------------------------------------------|----------------------------|-------|
| Mesostigmata (Uropodina) | Dinychidae    | <i>Dinychus perforatus</i> Kramer                                             | <i>Plectus</i> spp. (Plectidae) [FL]                                                                      | - | Nematode DNA detected in predator gut                                   | Field                      | [101] |
|                          | Polyaspididae | Mix of <i>Trachytes aegrota</i> (Koch) and <i>Trachytes pauperior</i> Berlese | Mix of <i>Aphelenchoides</i> spp. (Aphelenchoididae) and <i>Acrobeloides</i> spp. (Cephalobidae) [FL]     | - | The presence of mites reduced the nematode population on some samplings | Lab: Microcosms experiment | [174] |
|                          |               | <i>Polyaspis</i> sp.                                                          | <i>Cephalobus</i> sp. (Cephalobidae) [FL]                                                                 | - | -                                                                       | Lab                        | [115] |
|                          |               | <i>Polyaspis</i> sp. 1                                                        | <i>Panagrellus silusiae</i> (de Man) (Panagrolaimidae) [FL]                                               | - | -                                                                       | Lab                        | [310] |
|                          |               |                                                                               | Mix of <i>Panagrellus silusiae</i> (de Man) (Panagrolaimidae) and <i>Rhabditis</i> sp. (Rhabditidae) [FL] | - | -                                                                       | Lab                        | [160] |
|                          |               | <i>Trachytes aegrota</i> (Koch)                                               | <i>Acrobeloides buetschlii</i> (de Man) Steiner & Buhrer [FL]                                             | - | Nematode DNA detected in predator gut                                   | Lab                        | [102] |
|                          |               |                                                                               | <i>Panagrellus redivivus</i> (Linnaeus) (Panagrolaimidae) [FL]                                            | - | Nematode DNA detected in predator gut                                   | Lab                        | [102] |

|  |              |                                                          |                                                       |                                                                           |                                                                                                                                                                                                                                                                                                                                                            |     |                 |
|--|--------------|----------------------------------------------------------|-------------------------------------------------------|---------------------------------------------------------------------------|------------------------------------------------------------------------------------------------------------------------------------------------------------------------------------------------------------------------------------------------------------------------------------------------------------------------------------------------------------|-----|-----------------|
|  |              |                                                          | <i>Plectus minimus</i> Cobb<br>(Plectidae)<br>[FL]    | -                                                                         | Nematode DNA detected<br>in predator gut                                                                                                                                                                                                                                                                                                                   | Lab | [102]           |
|  |              |                                                          | <i>Plectus velox</i> Bastian<br>(Plectidae)<br>[FL]   | -                                                                         | Nematode DNA detected<br>in predator gut                                                                                                                                                                                                                                                                                                                   | Lab | [102]           |
|  | Trematuridae | <i>Trichouropoda adjuncti</i><br>Wisniewski & Hirschmann | Unidentified nematode<br>[possibly FL]                | -                                                                         | -                                                                                                                                                                                                                                                                                                                                                          | Lab | [244]<br>xxxi   |
|  |              | <i>Trichouropoda australis</i><br>Hirschmann             | Unidentified nematode<br>[possibly FL]                | -                                                                         | -                                                                                                                                                                                                                                                                                                                                                          | Lab | [244]<br>xxxii  |
|  |              | <i>Trichouropoda polytricha</i><br>(Vitzthum)            | Unidentified nematode<br>[possibly FL]                | -                                                                         | -                                                                                                                                                                                                                                                                                                                                                          | Lab | [244]<br>xxxiii |
|  | Uropodidae   | <i>Fuscuropoda vegetans</i> (De<br>Geer)                 | <i>Rhabditella leptura</i> (Cobb)<br>Chitwood<br>[FL] | (CM)<br>[ <i>Musca domestica</i> L.<br>(Insecta: Diptera:<br>Tachinidae)] | Production of about 175<br>and 310 adults <i>F. vegetans</i><br>from 20 females and 20<br>males in 44 days with<br>nematodes + housefly eggs<br>and only with nematodes,<br>respectively<br><br>Production of adult mites<br>1.38 and 1.8x higher with<br>Nematodes + housefly<br>eggs than with only<br>housefly eggs and only<br>nematodes, respectively | Lab | [176]           |
|  |              |                                                          |                                                       | (CM)<br>[ <i>Musca domestica</i> L.<br>(Insecta: Diptera:<br>Tachinidae)] | Devel. time (with eggs of<br>house fly and manure) =<br>24 ± 0.75 days for isolated<br>females.<br><br>Daily oviposition 1.7x<br>higher than with the other<br>prey.                                                                                                                                                                                       | Lab | [177]           |

|  |  |                        |                                                                                                                     |   |                                                           |     |       |
|--|--|------------------------|---------------------------------------------------------------------------------------------------------------------|---|-----------------------------------------------------------|-----|-------|
|  |  | <i>Fuscuropoda</i> sp. | <i>Aphelenchus avenae</i> Bastian<br>(Aphelenchidae)<br>[FL]                                                        | - | Aggregation in pits of<br>nematodes and active<br>feeding | Lab | [175] |
|  |  |                        | <i>Aphelenchoides composticola</i><br>Franklin<br>(Aphelenchoididae)<br>[FL]                                        | - | Aggregation in pits of<br>nematodes and active<br>feeding | Lab | [175] |
|  |  |                        | <i>Panagrellus redivivus</i><br>(Linnaeus)<br>(Panagrolaimidae)<br>[FL]                                             | - | Aggregation in pits of<br>nematodes and active<br>feeding | Lab | [175] |
|  |  |                        | <i>Pelodera teres</i> Schneider (= <i>Rhabditis teres</i> (Schneider) Bütschli)<br>[FL]                             | - | Aggregation in pits of<br>nematodes and active<br>feeding | Lab | [175] |
|  |  |                        | <i>Rhabditella axei</i> (Cobbold)<br>(= <i>Rhabditis elongate</i> (A. Schneider) Bütschli)<br>(Rhabditidae)<br>[FL] | - | Aggregation in pits of<br>nematodes and active<br>feeding | Lab | [175] |

|  |  |                                                         |                                                                                                                                   |                                                                                                                                                                                                                                                                                                                                                  |                                                                                                                                                                                                                                                         |       |       |
|--|--|---------------------------------------------------------|-----------------------------------------------------------------------------------------------------------------------------------|--------------------------------------------------------------------------------------------------------------------------------------------------------------------------------------------------------------------------------------------------------------------------------------------------------------------------------------------------|---------------------------------------------------------------------------------------------------------------------------------------------------------------------------------------------------------------------------------------------------------|-------|-------|
|  |  | <i>Nenteria hypotrichus</i> (El-Borolossy & El-Banhawy) | <i>Tylenchulus semipenetrans</i> Cobb [PP]                                                                                        | (CM)<br>[ <i>Rhizoglyphus robini</i> Claparede (Acari: Sarcoptiformes: Astigmatina: Acaridae), unidentified Collembola (Hexapoda), <i>Aspergillus niger</i> Tiegh. and <i>Penicillium</i> sp. (Ascomycota: Aspergillaceae), <i>Trichoderma</i> sp. (Ascomycota: Hypocreaceae), and <i>Fusarium oxysporum</i> Schltdl. (Ascomycota: Nectriaceae)] | Devel. time = 46.91 ± 14.0 days.<br><br>Reared from larva to adult<br><br>44% of survival with only nematodes (survival only with nematodes and <i>R. robini</i> ). Reproduction only in combination with <i>R. robini</i> (8.5 ± 1.97 eggs/female/day) | Lab   | [311] |
|  |  | <i>Uropoda cassidea</i> (Hermann)                       | <i>Acrobeloides buetschlii</i> (de Man) Steiner & Buhrer [FL]                                                                     | -                                                                                                                                                                                                                                                                                                                                                | Nematode DNA detected in predator gut                                                                                                                                                                                                                   | Lab   | [102] |
|  |  |                                                         |                                                                                                                                   | -                                                                                                                                                                                                                                                                                                                                                | Nematode DNA detected in predator gut                                                                                                                                                                                                                   | Field | [101] |
|  |  |                                                         | <i>Panagrellus redivivus</i> (Linnaeus) (Panagrolaimidae) [FL]                                                                    | -                                                                                                                                                                                                                                                                                                                                                | Nematode DNA detected in predator gut                                                                                                                                                                                                                   | Lab   | [102] |
|  |  |                                                         | <i>Pellioiditis hermaphrodita</i> (Schneider) (= <i>Phasmarhabditis hermaphrodita</i> (A. Schneider) Andrassy) (Rhabditidae) [AP] | -                                                                                                                                                                                                                                                                                                                                                | Nematode DNA detected in predator gut                                                                                                                                                                                                                   | Field | [100] |

|  |               |                                              |                                                                                                                              |                                                                                                             |                                                          |                       |       |
|--|---------------|----------------------------------------------|------------------------------------------------------------------------------------------------------------------------------|-------------------------------------------------------------------------------------------------------------|----------------------------------------------------------|-----------------------|-------|
|  |               |                                              | <i>Steinernema feltiae</i> (Filipjev)<br>Wouts, Mráček, Gerdin &<br>Bedding<br>(Steinernematidae)<br>[AP]                    | -                                                                                                           | Nematode DNA detected<br>in predator gut                 | Field                 | [100] |
|  |               |                                              | <i>Plectus minimus</i> Cobb<br>(Plectidae)<br>[FL]                                                                           | -                                                                                                           | Nematode DNA detected<br>in predator gut                 | Lab                   | [102] |
|  |               |                                              | <i>Plectus</i> spp. (Plectidae)<br>[FL]                                                                                      | -                                                                                                           | Nematode DNA detected<br>in predator gut                 | Field                 | [102] |
|  |               |                                              |                                                                                                                              | -                                                                                                           | Nematode DNA detected<br>in predator gut                 | Field                 | [101] |
|  |               |                                              | <i>Plectus velox</i> Bastian<br>(Plectidae)<br>[FL]                                                                          | -                                                                                                           | Nematode DNA detected<br>in predator gut                 | Lab                   | [102] |
|  |               | <i>Uropoda orbicularis</i> (Müller)          | Unidentified nematode<br>[possibly FL]                                                                                       | (C) <sup>xxxiv</sup><br>[unidentified<br>Collembola, bacterial<br>slime, fungal hyphae,<br>cooked potatoes] | Nematodes preferred                                      | Lab                   | [152] |
|  |               |                                              | <i>Globodera</i> sp.<br>(Heteroderidae)<br>[PP]                                                                              | -                                                                                                           | -                                                        | Field:<br>Observation | [152] |
|  |               | <i>Uropoda</i> sp.                           | <i>Cephalobus</i><br>sp. (Cephalobidae)<br>[FL]                                                                              | -                                                                                                           | -                                                        | Lab                   | [115] |
|  | Urodinychidae | <i>Uroobovella marginata</i> (Koch,<br>1839) | <i>Rhabditella axei</i> (Cobbold)<br>(= <i>Rhabditis elongate</i> (A.<br>Schneider) Bütschli)<br>(Rhabditidae)<br>[FL]       | (C)<br>[ <i>Musca domestica</i> L.<br>(Insecta: Diptera:<br>Tachinidae) eggs and<br>L1]                     | Adults preferred<br>nematodes                            | Lab                   | [158] |
|  |               |                                              | <i>Haematozoon subulatum</i><br>Leisering (= <i>Rhitis</i><br><i>inermiformis</i> (Osche)<br>Andrássy) (Rhabditidae)<br>[FL] | -                                                                                                           | Reared from larva to<br>adult. Reproduction<br>occurred. | Lab                   | [171] |

|                             |                 |                                                 |                                                                                                           |   |                                                              |                     |               |
|-----------------------------|-----------------|-------------------------------------------------|-----------------------------------------------------------------------------------------------------------|---|--------------------------------------------------------------|---------------------|---------------|
| Mesostigmata (Sejida)       | Sejidae         | <i>Epicroseius</i> n. sp. A                     | Mix of <i>Panagrellus silusiae</i> (de Man) (Panagrolaimidae) and <i>Rhabditis</i> sp. (Rhabditidae) [FL] | - | -                                                            | Lab                 | [160]         |
|                             |                 | <i>Sejus boliviensis</i> Hirschmann & Kaczmarek | Unidentified nematode [possibly FL]                                                                       | - | -                                                            | Lab                 | [244]<br>xxxv |
|                             |                 | <i>Sejus</i> sp. 1                              | <i>Panagrellus silusiae</i> (de Man) (Panagrolaimidae) [FL]                                               | - | Devel. time = female: 27.6 ± 0.8 days; male: 28.2 ± 0.6 days | Lab                 | [310]         |
|                             |                 | <i>Sejus</i> n. sp. A                           | Mix of <i>Panagrellus silusiae</i> (de Man) (Panagrolaimidae) and <i>Rhabditis</i> sp. (Rhabditidae) [FL] | - | -                                                            | Lab                 | [160]         |
| Mesostigmata (Trigynaspida) | Asternoseiidae  | N. gen. nr <i>Asternoseius</i> sp.              | <i>Panagrellus silusiae</i> (de Man) (Panagrolaimidae) [FL]                                               | - | -                                                            | Lab                 | [310]         |
|                             |                 |                                                 | Mix of <i>Panagrellus silusiae</i> (de Man) (Panagrolaimidae) and <i>Rhabditis</i> sp. (Rhabditidae) [FL] | - | -                                                            | Lab                 | [160]         |
|                             | Cercomegistidae | <i>Cercoleipus coelonotus</i> Kinn              | Unknown species (Diplogastridae) [FL]                                                                     | - | -                                                            | Field: Observations | [293]         |



|  |               |                                         |                                                                                                           |   |                                                            |                     |                |
|--|---------------|-----------------------------------------|-----------------------------------------------------------------------------------------------------------|---|------------------------------------------------------------|---------------------|----------------|
|  |               |                                         | <i>Contortylenchus elongatus</i> (Massey) (Allantonematidae) [AP]                                         | - | -                                                          | Field: Observations | [293]          |
|  | Davacaridae   | <i>Acanthodavacarus klompeni</i> Walter | Unidentified nematode [possibly FL]                                                                       | - | -                                                          | Lab                 | [312]          |
|  |               |                                         | Mix of <i>Panagrellus silusiae</i> (de Man) (Panagrolaimidae) and <i>Rhabditis</i> sp. (Rhabditidae) [FL] | - | -                                                          | Lab                 | [160]          |
|  | Fedrizzidae   | <i>Fedrizzia grossipes</i> Canestrini   | <i>Panagrellus silusiae</i> (de Man) (Panagrolaimidae) [FL]                                               | - | Few reached adulthood                                      | Lab                 | [313]          |
|  |               |                                         | Mix of <i>Panagrellus silusiae</i> (de Man) (Panagrolaimidae) and <i>Rhabditis</i> sp. (Rhabditidae) [FL] | - | -                                                          | Lab                 | [160]          |
|  |               | <i>Neofedrizzia camini</i> Womersley    | <i>Panagrellus silusiae</i> (de Man) (Panagrolaimidae) [FL]                                               | - | Devel. time = 57 ± 2 days                                  | Lab                 | [313]          |
|  |               |                                         | Mix of <i>Panagrellus silusiae</i> (de Man) (Panagrolaimidae) and <i>Rhabditis</i> sp. (Rhabditidae) [FL] | - | -                                                          | Lab                 | [160]          |
|  | Megisthanidae | <i>Megisthanus floridanus</i> Banks     | Unidentified nematode [possibly FL]                                                                       | - | -                                                          | Lab: Observation    | [314]<br>xxxvi |
|  | Saltiseiidae  | <i>Saltiseius hunteri</i> Walter        | <i>Panagrellus silusiae</i> (de Man) (Panagrolaimidae) [FL]                                               | - | 1.0 ± 0.6 eggs/female/day<br>Devel. time = 22.7 ± 0.6 days | Lab                 | [315]          |

|                              |                |                                                     |                                                                                                           |   |                                       |       |       |
|------------------------------|----------------|-----------------------------------------------------|-----------------------------------------------------------------------------------------------------------|---|---------------------------------------|-------|-------|
|                              |                |                                                     | Mix of <i>Panagrellus silusiae</i> (de Man) (Panagrolaimidae) and <i>Rhabditis</i> sp. (Rhabditidae) [FL] | - | -                                     | Lab   | [160] |
|                              | Triplogyniidae | <i>Funkotriplogynium iagobadius</i> Seeman & Walter | Unidentified nematode [possibly FL]                                                                       | - | -                                     | Lab   | [316] |
|                              |                |                                                     | Mix of <i>Panagrellus silusiae</i> (de Man) (Panagrolaimidae) and <i>Rhabditis</i> sp. (Rhabditidae) [FL] | - | -                                     | Lab   | [160] |
|                              |                | <i>Funkotriplogynium irapora</i> (Flechtmann)       | <i>Rhabditella axei</i> (Cobbold) (Rhabditidae) [FL]                                                      | - | -                                     | Lab   | [8]   |
| Oribatida (non- Astigmatina) | Achipteriidae  | <i>Achipteria coleoprata</i> (Linnaeus)             | <i>Acrobeloides buetschlii</i> (de Man) Steiner & Buhrer [FL]                                             | - | Nematode DNA detected in predator gut | Lab   | [102] |
|                              |                |                                                     | <i>Plectus minimus</i> Cobb (Plectidae) [FL]                                                              | - | Nematode DNA detected in predator gut | Lab   | [102] |
|                              |                |                                                     | <i>Plectus</i> spp. (Plectidae) [FL]                                                                      | - | Nematode DNA detected in predator gut | Field | [101] |
|                              | Carabodidae    | <i>Carabodes femoralis</i> (Nicolet)                | <i>Acrobeloides buetschlii</i> (de Man) Steiner & Buhrer [FL]                                             | - | Nematode DNA detected in predator gut | Field | [101] |
|                              |                | <i>Carabodes</i> spp.                               | <i>Acrobeloides buetschlii</i> (de Man) Steiner & Buhrer [FL]                                             | - | Nematode DNA detected in predator gut | Lab   | [102] |

|  |               |                                                    |                                                                                                                                                                                                                                                                                   |   |                                       |      |       |
|--|---------------|----------------------------------------------------|-----------------------------------------------------------------------------------------------------------------------------------------------------------------------------------------------------------------------------------------------------------------------------------|---|---------------------------------------|------|-------|
|  |               |                                                    | <i>Panagrellus redivivus</i> (Linnaeus) (Panagrolaimidae) [FL]                                                                                                                                                                                                                    | - | Nematode DNA detected in predator gut | Lab  | [102] |
|  |               |                                                    | <i>Plectus minimus</i> Cobb (Plectidae) [FL]                                                                                                                                                                                                                                      | - | Nematode DNA detected in predator gut | Lab  | [102] |
|  | Ceratoppidae  | <i>Ceratoppia</i> sp.                              | <i>Cephalobus</i> sp. (Cephalobidae) [FL]                                                                                                                                                                                                                                         | - | -                                     | Lab  | [115] |
|  | Ceratozetidae | <i>Ceratozetes</i> sp.                             | Unidentified nematode [possibly FL]                                                                                                                                                                                                                                               | - | -                                     | Lab  | [98]  |
|  |               | <i>Ceratozetes</i> sp.                             | Mix of <i>Acrobeloides</i> spp. (Cephalobidae), <i>Aphelenchoides</i> sp. (Aphelenchoididae), and <i>Aphelenchus avenae</i> Bastian (Aphelenchidae), <i>Panagrolaimus</i> sp. (Panagrolaimidae) [FL]                                                                              | - | -                                     | Lab  | [7]   |
|  |               | <i>Ceratozetes</i> sp. (= <i>Ceratozetes</i> sp.1) | Mix of <i>Panagrolaimus</i> sp. (Panagrolaimidae), <i>Acrobeloides nanus</i> (de Man) Anderson (= <i>Cephalobus nanus</i> ) and <i>Acrobeloides</i> spp. (Cephalobidae), <i>Aphelenchoides</i> sp. (Aphelenchoididae), and <i>Aphelenchus avenae</i> Bastian (Aphelenchidae) [FL] | - | Reared from larva to adult            | Lab  | [6]   |
|  |               |                                                    | Unidentified nematode [possibly FL]                                                                                                                                                                                                                                               | - | Reared from larva to adult            | Lab? | [97]  |

|  |              |                                                                                                              |                                                                                                                                                         |   |                                                                                          |       |       |
|--|--------------|--------------------------------------------------------------------------------------------------------------|---------------------------------------------------------------------------------------------------------------------------------------------------------|---|------------------------------------------------------------------------------------------|-------|-------|
|  |              | <i>Fuscozetes</i> sp.                                                                                        | <i>Chiloplacus</i> sp.<br>(Cephalobidae) or <i>Rhabditis</i><br>sp. (Rhabditidae)<br>[FL]                                                               | - | Very limited<br>nematophagy-observed<br>devouring nematodes a<br>maximum of 1 or 2 times | Lab   | [317] |
|  | Chamobatidae | <i>Chamobates voigtsi</i><br>(Oudemans)                                                                      | <i>Pellioiditis hermaphrodita</i><br>(Schneider) (= <i>Phasmarhabditis</i><br><i>hermaphrodita</i> (A.<br>Schneider) Andrassy)<br>(Rhabditidae)<br>[AP] | - | Nematode DNA detected<br>in predator gut                                                 | Field | [100] |
|  |              | <i>Chamobates</i> (C.) <i>subglobulus</i><br>(Oudemans)                                                      | <i>Plectus</i> spp. (Plectidae)<br>[FL]                                                                                                                 | - | Nematode DNA detected<br>in predator gut                                                 | Field | [102] |
|  | Crotoniidae  | <i>Heminothrus</i> ( <i>Platynothrus</i> )<br><i>peltifer</i> (Koch) (= <i>Platynothrus peltifer</i> (Koch)) | <i>Acrobeloides buetschlii</i> (de<br>Man) Steiner & Buhrer<br>[FL]                                                                                     | - | Nematode DNA detected<br>in predator gut                                                 | Lab   | [102] |
|  |              |                                                                                                              | <i>Panagrellus redivivus</i><br>(Linnaeus)<br>(Panagrolaimidae)<br>[FL]                                                                                 | - | Nematode DNA detected<br>in predator gut                                                 | Lab   | [102] |
|  |              |                                                                                                              | <i>Pellioiditis hermaphrodita</i><br>(Schneider) (= <i>Phasmarhabditis</i><br><i>hermaphrodita</i> (A.<br>Schneider) Andrassy)<br>(Rhabditidae)<br>[AP] | - | Nematode DNA detected<br>in predator gut                                                 | Field | [100] |
|  |              |                                                                                                              | <i>Plectus minimus</i> Cobb<br>(Plectidae)<br>[FL]                                                                                                      | - | Nematode DNA detected<br>in predator gut                                                 | Lab   | [102] |
|  |              |                                                                                                              | <i>Plectus</i> spp. (Plectidae)<br>[FL]                                                                                                                 | - | Nematode DNA detected<br>in predator gut                                                 | Field | [101] |

|  |                        |                                 |                                                                                                                                   |   |                                                                |       |       |
|--|------------------------|---------------------------------|-----------------------------------------------------------------------------------------------------------------------------------|---|----------------------------------------------------------------|-------|-------|
|  | Damaeidae (= Belbidae) | <i>Damaeus riparius</i> Nicolet | <i>Pellioiditis hermaphrodita</i> (Schneider) (= <i>Phasmarhabditis hermaphrodita</i> (A. Schneider) Andrassy) (Rhabditidae) [AP] | - | Nematode DNA detected in predator gut                          | Lab   | [100] |
|  |                        |                                 | <i>Steinernema feltiae</i> (Filipjev) Wouts, Mráček, Gerdin & Bedding (Steinernematidae) [AP]                                     | - | Nematode DNA detected in predator gut<br>Consumed occasionally | Lab   | [100] |
|  |                        | Unidentified species (nymphae)  | <i>Cephalobus</i> sp. (Cephalobidae) [FL]                                                                                         | - | -                                                              | Lab   | [115] |
|  |                        | Unidentified species            | <i>Acrobeloides buetschlii</i> (de Man) Steiner & Buhrer [FL]                                                                     | - | Nematode DNA detected in predator gut                          | Field | [101] |
|  |                        |                                 | <i>Plectus</i> spp. (Plectidae) [FL]                                                                                              | - | Nematode DNA detected in predator gut                          | Field | [101] |
|  | Galumnidae             | <i>Galumna</i> spp.             | <i>Acrobeloides buetschlii</i> (de Man) Steiner & Buhrer [FL]                                                                     | - | Nematode DNA detected in predator gut                          | Lab   | [102] |
|  |                        |                                 | <i>Panagrellus redivivus</i> (Linnaeus) (Panagrolaimidae) [FL]                                                                    | - | Nematode DNA detected in predator gut                          | Lab   | [102] |
|  |                        |                                 | <i>Plectus</i> spp. (Plectidae) [FL]                                                                                              | - | Nematode DNA detected in predator gut                          | Field | [101] |
|  |                        |                                 | <i>Plectus velox</i> Bastian (Plectidae) [FL]                                                                                     | - | Nematode DNA detected in predator gut                          | Lab   | [102] |
|  |                        | <i>Galumna</i> sp.              | <i>Chiloplacus</i> sp. (Cephalobidae) or <i>Rhabditis</i> sp. (Rhabditidae) [FL]                                                  | - | devour infrequently                                            | Lab   | [317] |

|  |  |                                                                                                   |                                                                                                                                                                                                                              |   |                   |     |         |
|--|--|---------------------------------------------------------------------------------------------------|------------------------------------------------------------------------------------------------------------------------------------------------------------------------------------------------------------------------------|---|-------------------|-----|---------|
|  |  | <i>Pergalumna (P.) altera</i><br>(Oudemans) (= <i>Pergalumna harunaensis</i> Aoki)                | <i>Cephalobus</i><br>sp. (Cephalobidae)<br>[FL]                                                                                                                                                                              | - | -                 | Lab | [115]   |
|  |  | <i>Pergalumna (P.) emarginata</i><br>(Banks) (= <i>Pergalumna omniphagous</i> Rockett & Woodring) | <i>Pelodera</i> sp. (Rhabditidae)<br>(= <i>Pelodera lambensis</i> Dougherty)<br>[FL]                                                                                                                                         | - | -                 | Lab | [95,96] |
|  |  |                                                                                                   | <i>Tylenchorhynchus annulatus</i><br>(Cassidy) Golden (= <i>Tylenchorhynchus martini</i> Fielding) (Dolichodoridae)<br>[PP]                                                                                                  | - | -                 | Lab | [95,96] |
|  |  | <i>Pergalumna (P.) intermedia</i><br>Aoki                                                         | <i>Cephalobus</i><br>sp. (Cephalobidae)<br>[FL]                                                                                                                                                                              | - | -                 | Lab | [115]   |
|  |  | <i>Pergalumna (P.) magnipora capillaris</i> Aoki                                                  | <i>Cephalobus</i><br>sp. (Cephalobidae)<br>[FL]                                                                                                                                                                              | - | -                 | Lab | [115]   |
|  |  | <i>Pergalumna</i> sp.                                                                             | <i>Chiloplacus</i> sp.<br>(Cephalobidae) or <i>Rhabditis</i><br>sp. (Rhabditidae)<br>[FL]                                                                                                                                    | - | devour frequently | Lab | [317]   |
|  |  | <i>Pergalumna</i> sp.                                                                             | Mix of <i>Acrobeloides</i> spp.<br>(Cephalobidae),<br><i>Aphelenchoides</i> sp.<br>(Aphelenchoididae), and<br><i>Aphelenchus avenae</i> Bastian<br>(Aphelenchidae),<br><i>Panagrolaimus</i> sp.<br>(Panagrolaimidae)<br>[FL] | - | -                 | Lab | [7]     |
|  |  | <i>Pergalumna</i> sp.                                                                             | <i>Meloidogyne javanica</i><br>(Treub) Chitwood<br>(Meloidogynidae) J2<br>[PP]                                                                                                                                               | - | -                 | Lab | [318]   |

|  |  |                                        |                                                                                                                                                                                                                              |   |                                         |      |       |
|--|--|----------------------------------------|------------------------------------------------------------------------------------------------------------------------------------------------------------------------------------------------------------------------------|---|-----------------------------------------|------|-------|
|  |  |                                        | <i>Pratylenchus coffeae</i><br>(Zimmermann) Filipjev &<br>Schuurmans Stekhoven<br>(Pratylenchidae) J2 and<br>adults<br>[PP]                                                                                                  | - | -                                       | Lab  | [318] |
|  |  | <i>Pilogalumna coxadensis</i><br>Nevin | <i>Heterorhabditis heliothidis</i><br>Khan, Brooks &<br>Hirschmann<br>(Heterorhabditidae)<br>[AP]                                                                                                                            | - | -                                       | Lab  | [112] |
|  |  |                                        | <i>Steinernema feltiae</i> (Filipjev)<br>Wouts, Mráček, Gerdin &<br>Bedding<br>(Steinernematidae)<br>[AP]                                                                                                                    | - | -                                       | Lab  | [112] |
|  |  | <i>Pilogalumna</i> n. sp.              | Unidentified nematode<br>[possibly FL]                                                                                                                                                                                       | - | Reared from larva to adult              | Lab? | [97]  |
|  |  | <i>Pilogalumna</i> sp.                 | Unidentified nematode<br>[possibly FL]                                                                                                                                                                                       | - | Cultured through several<br>generations | Lab  | [98]  |
|  |  | <i>Pilogalumna</i> sp.                 | Mix of <i>Acrobeloides</i> spp.<br>(Cephalobidae),<br><i>Aphelenchoides</i> sp.<br>(Aphelenchoididae), and<br><i>Aphelenchus avenae</i> Bastian<br>(Aphelenchidae),<br><i>Panagrolaimus</i> sp.<br>(Panagrolaimidae)<br>[FL] | - | Reared                                  | Lab  | [7]   |

|  |              |                                                                        |                                                                                                                                                                                                                                                                                   |   |                            |     |       |
|--|--------------|------------------------------------------------------------------------|-----------------------------------------------------------------------------------------------------------------------------------------------------------------------------------------------------------------------------------------------------------------------------------|---|----------------------------|-----|-------|
|  |              | <i>Pilogalumna</i> sp.                                                 | Mix of <i>Panagrolaimus</i> sp. (Panagrolaimidae), <i>Acrobeloides nanus</i> (de Man) Anderson (= <i>Cephalobus nanus</i> ) and <i>Acrobeloides</i> spp. (Cephalobidae), <i>Aphelenchoides</i> sp. (Aphelenchoididae), and <i>Aphelenchus avenae</i> Bastian (Aphelenchidae) [FL] | - | Reared from larva to adult | Lab | [6]   |
|  |              | <i>Trichogalumna nipponica</i> (Aoki) (= <i>Pergalumna duplicata</i> ) | <i>Cephalobus</i> sp. (Cephalobidae) [FL]                                                                                                                                                                                                                                         | - | -                          | Lab | [115] |
|  | Haplozetidae | <i>Haplozetes</i> sp.                                                  | Unidentified nematode [possibly FL]                                                                                                                                                                                                                                               | - | Reared to adult            | Lab | [98]  |
|  |              | <i>Haplozetes</i> sp.                                                  | Mix of <i>Acrobeloides</i> spp. (Cephalobidae), <i>Aphelenchoides</i> sp. (Aphelenchoididae), and <i>Aphelenchus avenae</i> Bastian (Aphelenchidae), <i>Panagrolaimus</i> sp. (Panagrolaimidae) [FL]                                                                              | - | -                          | Lab | [7]   |
|  |              | <i>Haplozetes</i> sp.                                                  | Mix of <i>Panagrolaimus</i> sp. (Panagrolaimidae), <i>Acrobeloides nanus</i> (de Man) Anderson (= <i>Cephalobus nanus</i> ) and <i>Acrobeloides</i> spp. (Cephalobidae), <i>Aphelenchoides</i> sp. (Aphelenchoididae), and <i>Aphelenchus avenae</i> Bastian (Aphelenchidae) [FL] | - | -                          | Lab | [6]   |



|  |                 |                                           |                                                                                                                                                                                                                              |   |                                                                       |       |       |
|--|-----------------|-------------------------------------------|------------------------------------------------------------------------------------------------------------------------------------------------------------------------------------------------------------------------------|---|-----------------------------------------------------------------------|-------|-------|
|  |                 |                                           | Unidentified nematode<br>[possibly FL]                                                                                                                                                                                       | - | Reared from larva to adult                                            | Lab?  | [97]  |
|  |                 | <i>Peloribates (P.) acutus</i> Aoki       | <i>Cephalobus</i><br>sp. (Cephalobidae)<br>[FL]                                                                                                                                                                              | - | -                                                                     | Lab   | [115] |
|  |                 | <i>Peloribates</i> sp.                    | Mix of <i>Acrobeloides</i> spp.<br>(Cephalobidae),<br><i>Aphelenchoides</i> sp.<br>(Aphelenchoididae), and<br><i>Aphelenchus avenae</i> Bastian<br>(Aphelenchidae),<br><i>Panagrolaimus</i> sp.<br>(Panagrolaimidae)<br>[FL] | - | -                                                                     | Lab   | [7]   |
|  |                 | <i>Rostrozetes foveolatus</i><br>Sellnick | <i>Cephalobus</i><br>sp. (Cephalobidae)<br>[FL]                                                                                                                                                                              | - | -                                                                     | Lab   | [115] |
|  | Hermanniidae    | <i>Hermannia gibba</i> (Koch)             | <i>Acrobeloides buetschlii</i> (de<br>Man) Steiner & Buhrer<br>[FL]                                                                                                                                                          | - | Nematode DNA detected<br>in predator gut                              | Field | [101] |
|  | Hypochthoniidae | <i>Hypochthonius rufulus</i> Koch         | <i>Steinernema feltiae</i> (Filipjev)<br>Wouts, Mráček, Gerdin &<br>Bedding<br>(Steinernematidae)<br>[AP]                                                                                                                    | - | Nematode DNA detected<br>in predator gut<br><br>Consumed occasionally | Lab   | [100] |
|  | Liacaridae      | <i>Liacarus (L.) orthogonios</i><br>Aoki  | <i>Cephalobus</i><br>sp. (Cephalobidae)<br>[FL]                                                                                                                                                                              | - | -                                                                     | Lab   | [115] |
|  |                 | <i>Liacarus subterraneus</i> (Koch)       | <i>Pellioditis hermaphrodita</i><br>(Schneider) (= <i>Phasmarhabditis</i><br><i>hermaphrodita</i> (A.<br>Schneider) Andrásy)<br>(Rhabditidae)<br>[AP]                                                                        | - | Nematode DNA detected<br>in predator gut                              | Field | [100] |

|  |           |                                                           |                                                                                                                                                         |   |                                          |       |       |
|--|-----------|-----------------------------------------------------------|---------------------------------------------------------------------------------------------------------------------------------------------------------|---|------------------------------------------|-------|-------|
|  |           |                                                           | <i>Steinernema feltiae</i> (Filipjev)<br>Wouts, Mráček, Gerdin &<br>Bedding<br>(Steinernematidae)<br>[AP]                                               | - | Nematode DNA detected<br>in predator gut | Field | [100] |
|  | Nothridae | <i>Nothrus biciliatus</i> Koch                            | <i>Cephalobus</i><br>sp. (Cephalobidae)<br>[FL]                                                                                                         | - | -                                        | Lab   | [115] |
|  |           | <i>Nothrus palustris</i> Koch                             | <i>Acrobelloides buetschlii</i> (de<br>Man) Steiner & Buhrer<br>[FL]                                                                                    | - | Nematode DNA detected<br>in predator gut | Field | [102] |
|  |           |                                                           | <i>Plectus</i> spp. (Plectidae)<br>[FL]                                                                                                                 | - | Nematode DNA detected<br>in predator gut | Field | [102] |
|  |           |                                                           |                                                                                                                                                         | - | Nematode DNA detected<br>in predator gut | Field | [101] |
|  |           | <i>Nothrus silvestris</i> Nicolet                         | <i>Acrobelloides buetschlii</i> (de<br>Man) Steiner & Buhrer<br>[FL]                                                                                    | - | Nematode DNA detected<br>in predator gut | Field | [102] |
|  |           |                                                           | <i>Pellioiditis hermaphrodita</i><br>(Schneider) (= <i>Phasmarhabditis</i><br><i>hermaphrodita</i> (A.<br>Schneider) Andrassy)<br>(Rhabditidae)<br>[AP] | - | Nematode DNA detected<br>in predator gut | Field | [100] |
|  |           |                                                           | <i>Plectus</i> spp. (Plectidae)<br>[FL]                                                                                                                 | - | Nematode DNA detected<br>in predator gut | Field | [102] |
|  |           |                                                           |                                                                                                                                                         | - | Nematode DNA detected<br>in predator gut | Field | [101] |
|  | Oppiidae  | <i>Oppiella nova</i> (Oudemans)<br>(= <i>Oppia nova</i> ) | <i>Cephalobus</i><br>sp. (Cephalobidae)<br>[FL]                                                                                                         | - | -                                        | Lab   | [115] |
|  |           | <i>Oppia</i> sp.                                          | <i>Cephalobus</i><br>sp. (Cephalobidae)<br>[FL]                                                                                                         | - | -                                        | Lab   | [115] |

|  |                |                                      |                                                                                                                                                                                                      |   |                                                                    |              |       |
|--|----------------|--------------------------------------|------------------------------------------------------------------------------------------------------------------------------------------------------------------------------------------------------|---|--------------------------------------------------------------------|--------------|-------|
|  |                | <i>Oppia</i> sp.                     | Mix of <i>Acrobeloides</i> spp. (Cephalobidae), <i>Aphelenchoides</i> sp. (Aphelenchoididae), and <i>Aphelenchus avenae</i> Bastian (Aphelenchidae), <i>Panagrolaimus</i> sp. (Panagrolaimidae) [FL] | - | -                                                                  | Lab          | [7]   |
|  | Oribatellidae  | <i>Oribatella calcarata</i> (Koch)   | <i>Plectus</i> spp. (Plectidae) [FL]                                                                                                                                                                 | - | Nematode DNA detected in predator gut                              | Field        | [101] |
|  | Phenopelopidae | <i>Eupelops</i> spp.                 | <i>Plectus</i> spp. (Plectidae) [FL]                                                                                                                                                                 | - | Nematode DNA detected in predator gut                              | Field        | [101] |
|  | Phthiracaridae | <i>Atropacarus striculus</i> (Koch)  | <i>Pellioiditis hermaphrodita</i> (Schneider) (= <i>Phasmarhabditis hermaphrodita</i> (A. Schneider) Andrásy) (Rhabditidae) [AP]                                                                     | - | Nematode DNA detected in predator gut<br><br>Consumed occasionally | Lab          | [100] |
|  |                | <i>Steganacarus magnus</i> (Nicolet) | <i>Acrobeloides buetschlii</i> (de Man) Steiner & Buhrer [FL]                                                                                                                                        | - | Nematode DNA detected in predator gut                              | Lab<br>Field | [102] |
|  |                |                                      | <i>Panagrellus redivivus</i> (Linnaeus) (Panagrolaimidae) [FL]                                                                                                                                       | - | Nematode DNA detected in predator gut<br><br>Consumed occasionally | Lab          | [102] |
|  |                |                                      | <i>Pellioiditis hermaphrodita</i> (Schneider) (= <i>Phasmarhabditis hermaphrodita</i> (A. Schneider) Andrásy) (Rhabditidae) [AP]                                                                     | - | Nematode DNA detected in predator gut                              | Lab<br>Field | [100] |

|  |                 |                                                               |                                                                                                                                                             |                                                                                   |                                                                                                                                                                    |       |       |
|--|-----------------|---------------------------------------------------------------|-------------------------------------------------------------------------------------------------------------------------------------------------------------|-----------------------------------------------------------------------------------|--------------------------------------------------------------------------------------------------------------------------------------------------------------------|-------|-------|
|  |                 |                                                               | <i>Plectus minimus</i> Cobb<br>(Plectidae)<br>[FL]                                                                                                          | -                                                                                 | Nematode DNA detected<br>in predator gut                                                                                                                           | Lab   | [102] |
|  |                 |                                                               | <i>Plectus</i> spp. (Plectidae)<br>[FL]                                                                                                                     | -                                                                                 | Nematode DNA detected<br>in predator gut                                                                                                                           | Field | [102] |
|  |                 |                                                               | <i>Plectus velox</i> Bastian<br>(Plectidae)<br>[FL]                                                                                                         | -                                                                                 | Nematode DNA detected<br>in predator gut<br><br>Consumed occasionally                                                                                              | Lab   | [102] |
|  |                 |                                                               | <i>Steinernema feltiae</i> (Filipjev)<br>Wouts, Mráček, Gerdin &<br>Bedding<br>(Steinernematidae)<br>[AP]                                                   | -                                                                                 | Nematode DNA detected<br>in predator gut<br><br>Consumed occasionally in<br>the lab<br><br>Not consumed in field                                                   | Lab   | [100] |
|  | Protoribatidae  | <i>Protoribates (P.) lophothrichus</i><br>(Berlese)           | <i>Cephalobus</i><br>sp. (Cephalobidae)<br>[FL]                                                                                                             | -                                                                                 | -                                                                                                                                                                  | Lab   | [115] |
|  |                 | <i>Protoribates</i> sp.                                       | <i>Cephalobus</i><br>sp. (Cephalobidae)<br>[FL]                                                                                                             | -                                                                                 | -                                                                                                                                                                  | Lab   | [115] |
|  | Scheloribatidae | <i>Scheloribates (S.) laevigatus</i><br>(Koch)                | <i>Cephalobus</i><br>sp. (Cephalobidae)<br>[FL]                                                                                                             | -                                                                                 | -                                                                                                                                                                  | Lab   | [115] |
|  |                 |                                                               | <i>Mononchoides</i><br><i>flagellicaudatus</i> (Andrássy)<br>Zullini (= <i>Eudiplogaster</i><br><i>flagellicaudata</i> Andrásy)<br>(Diplogastridae)<br>[FL] | (M)<br>[Slices of potato<br><i>Solanum tuberosum</i> L.<br>(Plantae: Solanaceae)] | Devel. time = 8.75 (at 30°C)<br>– 12.08 (at 25°C) days with<br>mixed diet<br><br>Fecundity = ~29.6 (at 30°C)<br>– 36.9 (at 25°C)<br>eggs/female with mixed<br>diet | Lab   | [99]  |
|  |                 | <i>Scheloribates (S.) pallidulus</i><br><i>latipes</i> (Koch) | <i>Cephalobus</i><br>sp. (Cephalobidae)<br>[FL]                                                                                                             | -                                                                                 | -                                                                                                                                                                  | Lab   | [115] |

|                     |                   |                                                                                                 |                                                                                                                                 |   |                                                                    |     |       |
|---------------------|-------------------|-------------------------------------------------------------------------------------------------|---------------------------------------------------------------------------------------------------------------------------------|---|--------------------------------------------------------------------|-----|-------|
|                     |                   | <i>Schelorbates (S.) rigidisetosus</i> Willmann                                                 | <i>Cephalobus</i> sp. (Cephalobidae) [FL]                                                                                       | - | -                                                                  | Lab | [115] |
|                     |                   | <i>Ceratozetella (C.) imperatoria</i> (Aoki) (= <i>Ceratozetes imperatorius</i> )               | <i>Cephalobus</i> sp. (Cephalobidae) [FL]                                                                                       | - | -                                                                  | Lab | [115] |
|                     | Suctobelbidae     | <i>Suctobelbella (Flagrosuctobelba) elegantula</i> (Hammer) (= <i>Suctobelba naginata</i> Aoki) | <i>Cephalobus</i> sp. (Cephalobidae) [FL]                                                                                       | - | -                                                                  | Lab | [115] |
|                     | Tectocepheidae    | <i>Tectocepheus velatus</i> (Michael)                                                           | <i>Cephalobus</i> sp. (Cephalobidae) [FL]                                                                                       | - | -                                                                  | Lab | [115] |
|                     | Tetracondylidae   | <i>Dolicheremaeus baloghi</i> Aoki                                                              | <i>Cephalobus</i> sp. (Cephalobidae) [FL]                                                                                       | - | -                                                                  | Lab | [115] |
|                     |                   | <i>Fissicepheus (F.) mitis</i> Aoki                                                             | <i>Cephalobus</i> sp. (Cephalobidae) [FL]                                                                                       | - | -                                                                  | Lab | [115] |
|                     | Trhypochthoniidae | <i>Archeogozetes longisetosus</i> Aoki                                                          | <i>Pellioditis hermaphrodita</i> (Schneider) (= <i>Phasmarhabditis hermaphrodita</i> (A. Schneider) Andrásy) (Rhabditidae) [AP] | - | Nematode DNA detected in predator gut<br><br>Consumed occasionally | Lab | [100] |
|                     |                   |                                                                                                 | <i>Steinernema feltiae</i> (Filipjev) Wouts, Mráček, Gerdin & Bedding (Steinernematidae) [AP]                                   | - | Nematode DNA detected in predator gut                              | Lab | [100] |
| Oribatida (Astigma) | Acaridae          | <i>Rhizoglyphus echinopus</i> (Fumouze & Robin)                                                 | <i>Aphelenchoides ritzemabosi</i> (Schwartz) (Aphelenchoididae) [PP]                                                            | - | -                                                                  | Lab | [104] |

|  |  |  |                                                                                                                                                      |   |                                                                           |                     |       |
|--|--|--|------------------------------------------------------------------------------------------------------------------------------------------------------|---|---------------------------------------------------------------------------|---------------------|-------|
|  |  |  | <i>Ditylenchus dipsaci</i> (Kuhn)<br>(Anguinidae)<br>[PP]                                                                                            | - | -                                                                         | Lab                 | [104] |
|  |  |  | <i>Ditylenchus destructor</i><br>Thorne (Anguinidae)<br>[PP]                                                                                         | - | -                                                                         | Lab                 | [104] |
|  |  |  | <i>Globodera rostochiensis</i><br>(Wollenweber)<br>Skarbilovich (= <i>Heterodera</i><br><i>rostochiensis</i> Wollenweber)<br>(Heteroderidae)<br>[PP] | - | 11-fold in a field<br>contaminated with <i>G.</i><br><i>rostochiensis</i> | Field: Observations | [103] |
|  |  |  | <i>Heterodera avenae</i><br>Wollenweber<br>(Heteroderidae)<br>[PP]                                                                                   | - | -                                                                         | Lab                 | [104] |
|  |  |  | <i>Longidorus elongatus</i> (de<br>Man) (Longidoridae)<br>[PP]                                                                                       | - | -                                                                         | Lab                 | [104] |
|  |  |  | <i>Xiphinema index</i> Thorne &<br>Allen (Longidoridae)<br>[PP]                                                                                      | - | -                                                                         | Lab                 | [104] |

|  |  |                                          |                                                                                                        |                                                                                                                |                                                                                                                                      |                                                                                                                                                                                                                                                               |       |
|--|--|------------------------------------------|--------------------------------------------------------------------------------------------------------|----------------------------------------------------------------------------------------------------------------|--------------------------------------------------------------------------------------------------------------------------------------|---------------------------------------------------------------------------------------------------------------------------------------------------------------------------------------------------------------------------------------------------------------|-------|
|  |  | <i>Rhizoglyphus robini</i><br>Claparede  | <i>Meloidogyne incognita</i><br>(Kofoid & White)<br>Chitwood<br>(Meloidogynidae)<br>[PP]               | (M)<br>Other invertebrates,<br>including free-living<br>nematodes (predators,<br>fungivores,<br>bacteriovores) | Observed in high number<br>in some samples<br><br>Development and<br>reproduction occurred                                           | Field:<br>Sweetpotato<br>( <i>Ipomoea batatas</i> (L.)<br>Lam.) in pots<br>with/without<br>sawdust<br>amendment<br><br>Greenhouse:<br>with tomato<br>( <i>Solanum<br/>lycopersicum</i> L.)<br>with/without<br>sawdust<br>amendment<br><br>Lab:<br>agar plates | [105] |
|  |  | <i>Sancassania berlesei</i><br>(Michael) | <i>Meloidogyne incognita</i><br>(Kofoid & White)<br>Chitwood<br>(Meloidogynidae) egg<br>masses<br>[PP] | -                                                                                                              | Devel. time = female: 9.72<br>± 0.28 days; male: 9.47 ±<br>0.07 days<br><br>$r_m = 0.23$<br>Fecundity: 190.75 ± 17.90<br>eggs/female | Lab                                                                                                                                                                                                                                                           | [111] |

|  |  |                                                                                       |                                                                                            |                                                           |                                                                                                                                                                                                                                                                                                                                                                          |     |       |
|--|--|---------------------------------------------------------------------------------------|--------------------------------------------------------------------------------------------|-----------------------------------------------------------|--------------------------------------------------------------------------------------------------------------------------------------------------------------------------------------------------------------------------------------------------------------------------------------------------------------------------------------------------------------------------|-----|-------|
|  |  |                                                                                       | <i>Meloidogyne</i> spp.<br>(Meloidogynidae) egg masses<br>[PP]                             | -                                                         | Devel. time = $8.3 \pm 0.3$ (at $30^{\circ}\text{C}$ ) to $21.7 \pm 0.5$ (at $20^{\circ}\text{C}$ ) days<br><br>$10.0 \pm 2.1$ (at $30^{\circ}\text{C}$ ) - $17.1 \pm 2.9$ (at $20^{\circ}\text{C}$ ) eggs/female/day<br><br>$r_m = 0.15 - 0.29$<br><br>Fecundity: $66.1 \pm 10.3$ (at $30^{\circ}\text{C}$ ) to $199.7 \pm 24.6$ (at $20^{\circ}\text{C}$ ) eggs/female | Lab | [319] |
|  |  | <i>Sancassania manure</i> (Eraky & Osman) (= <i>Caloglyphus manure</i> Eraky & Osman) | <i>Meloidogyne incognita</i> (Kofoed & White) Chitwood (Meloidogynidae) egg masses<br>[PP] | -                                                         | Devel. time = female: $5.82 \pm 0.13$ days; male: $5.31 \pm 0.1$ days<br><br>$r_m = 0.37$<br>Fecundity: $168.8 \pm 16.72$ eggs/female                                                                                                                                                                                                                                    | Lab | [111] |
|  |  |                                                                                       | <i>Meloidogyne</i> sp. (Meloidogynidae) egg masses<br>[PP]                                 | (C) [unidentified yeast (Fungi), unidentified dry cheese] | Devel. time = female: $8.10 \pm 0.27$ days; male: $10.40 \pm 0.40$ days<br><br>$11.36$ eggs/female/day<br>$r_m = 0.278$<br>Fecundity: $159.10 \pm 2.72$ eggs/female<br><br>Fecundity 3.4 and 3.8 x lower and $r_m$ 1.73 and 2.25x lower than with cheese and yeast, respectively                                                                                         | Lab | [114] |



|  |  |                                                   |                                                                                               |                                                                         |                                                                                                                     |                                                                   |       |
|--|--|---------------------------------------------------|-----------------------------------------------------------------------------------------------|-------------------------------------------------------------------------|---------------------------------------------------------------------------------------------------------------------|-------------------------------------------------------------------|-------|
|  |  | <i>Sancassania</i> sp. (= <i>Caloglyphus</i> sp.) | <i>Cephalobus</i> sp. (Cephalobidae) [FL]                                                     | (C) [unidentified yeast (Fungi)]                                        | Devel. time = ~ 7 days<br><br>Significant increase in the abundance of mites when inoculated with nematodes in soil | Lab: Petri dishes and pot experiment                              | [115] |
|  |  | <i>Sancassania</i> sp. (= <i>Caloglyphus</i> sp.) | <i>Meloidogyne hapla</i> Chitwood (Meloidogynidae) [PP]                                       | -                                                                       | Reared from larva to adult                                                                                          | Lab                                                               | [320] |
|  |  |                                                   | <i>Meloidogyne incognita</i> (Kofoed & White) Chitwood (Meloidogynidae) [PP]                  | -                                                                       | Reared from larva to adult                                                                                          | Lab                                                               | [320] |
|  |  |                                                   | <i>Meloidogyne javanica</i> (Treub) Chitwood (Meloidogynidae) [PP]                            | -                                                                       | Reared from larva to adult                                                                                          | Lab                                                               | [320] |
|  |  |                                                   | <i>Meloidogyne</i> sp. (Meloidogynidae) egg masses, J2 and females [PP]                       | -                                                                       | Declination of the nematode culture<br>Reared from larva to adult                                                   | Lab: Pot cultures of Root-knot nematode ( <i>Meloidogyne</i> sp.) | [320] |
|  |  | <i>Sancassania</i> sp. (= <i>Sancassania</i> sp.) | <i>Heterorhabditis bacteriophora</i> Poinar (Heterorhabditidae) [AP]                          | (C) [ <i>Steinernema feltiae</i> (Nematoda: Steinernematida)]           | Reduction of <i>H. bacteriophora</i> IJs                                                                            | Lab                                                               | [113] |
|  |  |                                                   | <i>Steinernema feltiae</i> (Filipjev) Wouts, Mráček, Gerdin & Bedding (Steinernematidae) [AP] | (C) [ <i>Heterorhabditis bacteriophora</i> (Nematoda: Steinernematida)] | Reduction of <i>S. feltiae</i> IJs<br><br>Consumption of 13.4% more <i>S. feltiae</i> than <i>H. bacteriophora</i>  | Lab                                                               | [113] |

|  |  |                                                                                                                  |                                                                                                                                                                                                                 |   |                                                             |                     |       |
|--|--|------------------------------------------------------------------------------------------------------------------|-----------------------------------------------------------------------------------------------------------------------------------------------------------------------------------------------------------------|---|-------------------------------------------------------------|---------------------|-------|
|  |  | <i>Schwiebea rocketti</i> Woodring                                                                               | Mix of <i>Radopholus</i> sp. (Pratylenchidae) <i>Rhabditis</i> sp. (Rhabditidae), unidentified species of Tylenchida [FL, PP]                                                                                   | - | -                                                           | Lab                 | [321] |
|  |  | <i>Tyrophagus similis</i> Volgin (= <i>Tyrophagus dimidiatus</i> (Hermann), <i>Tyrophagus infestans</i> Berlese) | Mix of <i>Acrobeloides nanus</i> (de Man) Anderson (= <i>Acrobeloides labiatus</i> Ivanova) (Cephalobidae), <i>Aphelenchus avenae</i> Bastian (Aphelenchidae), <i>Panagrolaimus</i> spp. (Panagrolaimidae) [FL] | - | Reared                                                      | Lab                 | [107] |
|  |  |                                                                                                                  | Mix of <i>Acrobeloides</i> spp. (Cephalobidae), <i>Aphelenchoides</i> sp. (Aphelenchoididae), and <i>Aphelenchus avenae</i> Bastian (Aphelenchidae), <i>Panagrolaimus</i> sp. (Panagrolaimidae) [FL]            | - | Reared                                                      | Lab                 | [7]   |
|  |  |                                                                                                                  | Unidentified nematode [possibly FL]                                                                                                                                                                             | - | Cultured through several generations                        | Lab                 | [98]  |
|  |  |                                                                                                                  | Unidentified nematode [possibly FL]                                                                                                                                                                             | - | Reared from larva to adult                                  | Lab?                | [97]  |
|  |  |                                                                                                                  | <i>Globodera rostochiensis</i> (Wollenweber) Skarbilovich (= <i>Heterodera rostochiensis</i> Wollenweber) (Heteroderidae) [PP]                                                                                  | - | 5-fold in a field contaminated with <i>G. rostochiensis</i> | Field: Observations | [103] |

|                                              |                                                                               |   |   |     |       |
|----------------------------------------------|-------------------------------------------------------------------------------|---|---|-----|-------|
| <i>Tyrophagus putrescentiae</i><br>(Schrank) | <i>Acrobeles</i> sp.<br>(Cephalobidae)<br>[FL]                                | - | - | Lab | [108] |
|                                              | <i>Acrobelloides</i> sp.<br>(Cephalobidae)<br>[FL]                            | - | - | Lab | [108] |
|                                              | <i>Anguina tritici</i> (Steinbuch)<br>(Anguinidae)<br>[PP]                    | - | - | Lab | [108] |
|                                              | <i>Aphelenchoides</i> sp.<br>(Aphelenchoididae)<br>[FL]                       | - | - | Lab | [108] |
|                                              | <i>Aporcelaimellus nivalis</i><br>(Altherr) Heyns<br>(Aporcelaimidae)<br>[FL] | - | - | Lab | [108] |
|                                              | <i>Aquatides thornei</i><br>(Schneider) Heyns<br>(Nygolaimidae)<br>[FL]       | - | - | Lab | [108] |
|                                              | <i>Basiria</i> sp. (Tylenchidae)<br>[PP]                                      | - | - | Lab | [108] |
|                                              | <i>Chiloplacus symmetricus</i><br>(Thorne) Thorne<br>(Cephalobidae)<br>[FL]   | - | - | Lab | [108] |
|                                              | <i>Dorylaimus stagnalis</i><br>Dujardin (Dorylaimidae)<br>[FL]                | - | - | Lab | [108] |
|                                              | <i>Helicotylenchus indicus</i><br>Siddiqi (Hoplolaimidae)<br>[PP]             | - | - | Lab | [108] |
|                                              | <i>Hemicriconemoides mangiferae</i> Siddiqi<br>(Criconematidae)<br>[PP]       | - | - | Lab | [108] |

|  |  |  |                                                                                                         |                                                                                                                                       |                                                                                                                                                                               |     |       |
|--|--|--|---------------------------------------------------------------------------------------------------------|---------------------------------------------------------------------------------------------------------------------------------------|-------------------------------------------------------------------------------------------------------------------------------------------------------------------------------|-----|-------|
|  |  |  | <i>Hermicycliophora</i> sp. (= <i>Hermicycliophora dhirendri</i> ) (Hermicycliophoridae) [PP]           | -                                                                                                                                     | -                                                                                                                                                                             | Lab | [108] |
|  |  |  | <i>Heterodera avenae</i> Wollenweber (Heteroderidae) eggs [PP]                                          | -                                                                                                                                     | -                                                                                                                                                                             | Lab | [109] |
|  |  |  | <i>Heterodera moths</i> Khan & Husain (Heteroderidae) [PP]                                              | -                                                                                                                                     | -                                                                                                                                                                             | Lab | [108] |
|  |  |  | <i>Hirschmanniella oryzae</i> (van Breda de Haan) Luc & Goodey (Pratylenchidae) [PP]                    | -                                                                                                                                     | -                                                                                                                                                                             | Lab | [108] |
|  |  |  | <i>Hoplolaimus indicus</i> Sher (Hoplolaimidae) [PP]                                                    | -                                                                                                                                     | -                                                                                                                                                                             | Lab | [108] |
|  |  |  | <i>Longidorus</i> sp. (Longidoridae) [PP]                                                               | -                                                                                                                                     | -                                                                                                                                                                             | Lab | [108] |
|  |  |  | <i>Meloidogyne incognita</i> (Kofoid & White) Chitwood (Meloidogynidae) egg masses, J2 and females [PP] | (C) [unidentified yeast (Fungi), unidentified cheese, <i>Rotylenchulus reniformis</i> Linford & Oliveira (Nematoda: Rotylenchulidae)] | Devel. time = female: 12.5 ± 0.3 days (on eggs), 9.9 ± 0.2 days (on females) $r_m = 0.28 - 0.29$<br><br>Fecundity 1.45 and 3.15 x lower and $r_m$ 1.25x lower than with yeast | Lab | [110] |

|  |  |  |                                                                                                                                                                                                                 |   |                                                                                                                                                  |     |       |
|--|--|--|-----------------------------------------------------------------------------------------------------------------------------------------------------------------------------------------------------------------|---|--------------------------------------------------------------------------------------------------------------------------------------------------|-----|-------|
|  |  |  |                                                                                                                                                                                                                 | - | Devel. time = female: 10.15 ± 0.23 days; male: 9.09 ± 0.22 days (on eggs)<br><br>$r_m = 0.27$<br>Fecundity: 227.75 ± 16.03 eggs/female (on eggs) | Lab | [111] |
|  |  |  |                                                                                                                                                                                                                 | - | Fed on J2                                                                                                                                        | Lab | [108] |
|  |  |  | <i>Meloidogyne javanica</i> (Treub) Chitwood (Meloidogynidae) eggs and J2 [PP]                                                                                                                                  | - | -                                                                                                                                                | Lab | [109] |
|  |  |  | <i>Mesorhabditis</i> sp. (Rhabditidae) [FL]                                                                                                                                                                     | - | -                                                                                                                                                | Lab | [108] |
|  |  |  | Mix of <i>Acrobeloides nanus</i> (de Man) Anderson (= <i>Acrobeloides labiatus</i> Ivanova) (Cephalobidae), <i>Aphelenchus avenae</i> Bastian (Aphelenchidae), <i>Panagrolaimus</i> spp. (Panagrolaimidae) [FL] | - | -                                                                                                                                                | Lab | [107] |
|  |  |  | Mix of <i>Rhabditis</i> sp. (Rhabditidae) and <i>Cephalobus</i> sp. (Cephalobidae) [FL]                                                                                                                         | - | Reared from larva to adult                                                                                                                       | Lab | [108] |

|  |  |  |                                                                                                         |                                                                                                                                                                     |                                                                                                                                               |     |       |
|--|--|--|---------------------------------------------------------------------------------------------------------|---------------------------------------------------------------------------------------------------------------------------------------------------------------------|-----------------------------------------------------------------------------------------------------------------------------------------------|-----|-------|
|  |  |  | <i>Mononchoides fortidens</i><br>(Schuermans Stekhoven)<br>Taylor & Hechler<br>(Diplogastridae)<br>[FL] | -                                                                                                                                                                   | -                                                                                                                                             | Lab | [108] |
|  |  |  | <i>Mononchoides longicaudatus</i><br>(Khera) Andrassy<br>(Diplogastridae)<br>[FL]                       | -                                                                                                                                                                   | -                                                                                                                                             | Lab | [108] |
|  |  |  | <i>Mononchus aquaticus</i><br>Coetzee (Mononchidae)<br>[FL]                                             | -                                                                                                                                                                   | -                                                                                                                                             | Lab | [108] |
|  |  |  | <i>Mylonchulus dentatus</i><br>Jairajpuri (Mylonchulidae)<br>[FL]                                       | -                                                                                                                                                                   | -                                                                                                                                             | Lab | [108] |
|  |  |  | <i>Paralongidorus citri</i><br>(Siddiqi) (Longidoridae)<br>[PP]                                         | -                                                                                                                                                                   | -                                                                                                                                             | Lab | [108] |
|  |  |  | <i>Paratrichodorus</i> sp.<br>(Trichodoridae)<br>[PP]                                                   | -                                                                                                                                                                   | -                                                                                                                                             | Lab | [108] |
|  |  |  | <i>Rotylenchulus reniformis</i><br>Linford & Oliveira<br>(Rotylenchulidae) egg<br>masses<br>[PP]        | (C)<br>[unidentified yeast<br>(Fungi), unidentified<br>cheese, <i>Meloidogyne</i><br><i>incognita</i> (Kofoed &<br>White) Chitwood<br>(Nematoda:<br>Meloidogynidae] | Devel. time = female: 12.0<br>± 0.2 days on eggs<br>$r_m = 0.28$<br><br>Fecundity 1.74x and lower<br>and $r_m$ 1.25x lower than<br>with yeast | Lab | [110] |
|  |  |  | <i>Rhabditis</i> sp. (Rhabditidae)<br>[FL]                                                              | -                                                                                                                                                                   | -                                                                                                                                             | Lab | [108] |
|  |  |  | <i>Tobrilus</i> sp. (Tobrilidae)<br>[FL]                                                                | -                                                                                                                                                                   | -                                                                                                                                             | Lab | [108] |

|  |  |                                         |                                                                                                                                                                                                                                      |   |                       |     |       |
|--|--|-----------------------------------------|--------------------------------------------------------------------------------------------------------------------------------------------------------------------------------------------------------------------------------------|---|-----------------------|-----|-------|
|  |  |                                         | <i>Steinernema feltiae</i> (Filipjev)<br>Wouts, Mráček, Gerdin &<br>Bedding<br>(Steinernematidae)<br>[AP]                                                                                                                            | - | Reproduction occurred | Lab | [112] |
|  |  |                                         | <i>Tylenchorhynchus mashhoodi</i><br>Siddiqi & Basir<br>(Dolichodoridae)<br>[PP]                                                                                                                                                     | - | -                     | Lab | [108] |
|  |  |                                         | <i>Xiphinema basiri</i> Siddiqi<br>(Longidoridae)<br>[PP]                                                                                                                                                                            | - | -                     | Lab | [108] |
|  |  | <i>Tyrophagus zachvatkini</i><br>Volgin | Mix of <i>Acrobeloides nanus</i><br>(de Man) Anderson (= <i>Acrobeloides labiatus</i><br>Ivanova) (Cephalobidae),<br><i>Aphelenchus avenae</i> Bastian<br>(Aphelenchidae),<br><i>Panagrolaimus</i> spp.<br>(Panagrolaimidae)<br>[FL] | - | Reared                | Lab | [107] |
|  |  |                                         | Mix of <i>Acrobeloides</i> spp.<br>(Cephalobidae),<br><i>Aphelenchoides</i> sp.<br>(Aphelenchoididae), and<br><i>Aphelenchus avenae</i> Bastian<br>(Aphelenchidae),<br><i>Panagrolaimus</i> sp.<br>(Panagrolaimidae)<br>[FL]         | - | Reared                | Lab | [7]   |

|             |           |                                                                          |                                                                                                                                                                                                                                                                                   |   |                                                                                  |                                                                        |                  |
|-------------|-----------|--------------------------------------------------------------------------|-----------------------------------------------------------------------------------------------------------------------------------------------------------------------------------------------------------------------------------------------------------------------------------|---|----------------------------------------------------------------------------------|------------------------------------------------------------------------|------------------|
| Prostigmata |           |                                                                          | Mix of <i>Acrobeloides nanus</i> (de Man) Anderson (= <i>Cephalobus nanus</i> ) and <i>Acrobeloides</i> spp. (Cephalobidae), <i>Aphelenchoides</i> sp. (Aphelenchoididae), and <i>Aphelenchus avenae</i> Bastian (Aphelenchidae), <i>Panagrolaimus</i> sp. (Panagrolaimidae) [FL] | - | Reared from larva to adult                                                       | Lab                                                                    | [6]              |
|             |           |                                                                          | Unidentified nematode [possibly FL]                                                                                                                                                                                                                                               | - | Cultured through several generations                                             | Lab                                                                    | [98]             |
|             |           |                                                                          | Unidentified nematode [possibly FL]                                                                                                                                                                                                                                               | - | Reared from larva to adult                                                       | Lab?                                                                   | [97]             |
|             | Bdellidae | <i>Bdella interrupta</i> Evans                                           | Unidentified nematode [possibly FL]                                                                                                                                                                                                                                               | - | -                                                                                | Field: Observations                                                    | [298]<br>xxxvii  |
|             |           | <i>Bdella longicornis</i> (Linnaeus) (= <i>Bdella decipiens</i> Thorell) | Unidentified nematode [possibly FL]                                                                                                                                                                                                                                               | - | -                                                                                | Lab                                                                    | [298]<br>xxxviii |
|             | Cunaxidae | <i>Coleoscurus simplex</i> (Ewing)                                       | <i>Meloidogyne incognita</i> (Kofoid & White) Chitwood (Meloidogynidae) [PP]                                                                                                                                                                                                      | - | Colonized Root-knot nematode culture<br><br>Laboratory cultures on nematode prey | Greenhouse: Pot cultures of Root-knot nematode ( <i>M. incognita</i> ) | [117]            |
|             |           |                                                                          | Mix of <i>Meloidogyne</i> spp. (Meloidogynidae), <i>Radopholus</i> sp. (Pratylenchidae) and <i>Rhabditis</i> sp. (Rhabditidae) [PP]                                                                                                                                               | - | Devel. time = female: 10 – 16 days; male: 10 – 12 days<br><br>Reared             | Lab                                                                    | [116]            |



|  |  |                                   |                                                                                                      |                                                                                          |                                                                                                                                                                                                                                                                                                                                                                                     |     |       |
|--|--|-----------------------------------|------------------------------------------------------------------------------------------------------|------------------------------------------------------------------------------------------|-------------------------------------------------------------------------------------------------------------------------------------------------------------------------------------------------------------------------------------------------------------------------------------------------------------------------------------------------------------------------------------|-----|-------|
|  |  | <i>Cunaxa capreolus</i> (Berlese) | <i>Meloidogyne incognita</i> (Kofoed & White) Chitwood (Meloidogynidae) eggs and J2 [PP]             | (C) [ <i>Tylenchulus semipenetrans</i> Cobb (Nematoda: Tylenchulidae)]                   | Devel. time = female: 15.06 ± 0.98 days (fed on J2) and 20.65 ± 1.08 days (fed on eggs)<br><br>Fecundity = 44.56 ± 2.18 eggs/female (fed on J2) and 9.29 ± 0.45 eggs/female (fed on eggs)<br>$r_m$ = 0.185 (fed on J2) and 0.085 (fed on eggs)<br><br>Fecundity feeding on J2 1.13x and 4.8x higher than with <i>T. semipenetrans</i> J2 and <i>M. incognita</i> eggs, respectively | Lab | [120] |
|  |  |                                   | <i>Mesorhabditis scanica</i> (Allgén) Sudhaus (= <i>Rhabditis scanica</i> Allgén) (Rhabditidae) [FL] | (C) [ <i>Entomobrya musatica</i> Stach (Collembola: Entomobryidae)]                      | Devel. time = female: 20.45 ± 0.39 days; male: 17.12 ± 0.40 (at 25°C)<br><br>Fecundity = 34.08 ± 0.89 eggs/female (at 25°C)<br><br>Fecundity higher with <i>E. musatica</i>                                                                                                                                                                                                         | Lab | [119] |
|  |  |                                   | <i>Tylenchulus semipenetrans</i> Cobb (Tylenchulidae) J2 [PP]                                        | (C) [ <i>Meloidogyne incognita</i> (Kofoed & White) Chitwood (Nematoda: Meloidogynidae)] | Devel. time = female: 16.22 ± 1.09 days (fed on J2)<br><br>Fecundity = 39.33 ± 3.14 eggs/female (fed on J2)<br><br>$r_m$ = 0.167 (fed on J2)<br><br>Fecundity 4.2x higher than with <i>M. incognita</i> eggs                                                                                                                                                                        | Lab | [120] |

|  |  |                                                |                                                                                                                                     |                                                                                                                              |                                                                                                                               |                                                                        |                      |
|--|--|------------------------------------------------|-------------------------------------------------------------------------------------------------------------------------------------|------------------------------------------------------------------------------------------------------------------------------|-------------------------------------------------------------------------------------------------------------------------------|------------------------------------------------------------------------|----------------------|
|  |  | <i>Neocunaxoides andrei</i> (Baker & Hoffmann) | <i>Panagrolaimus rigidus</i> (Schneider) (Panagrolaimidae) [FL]                                                                     | -                                                                                                                            | -                                                                                                                             | NA                                                                     | [322] cited by [323] |
|  |  | <i>Neoscirula</i> nr. <i>sevidi</i> Den Heyer  | Mix of <i>Meloidogyne</i> spp. (Meloidogynidae), <i>Radopholus</i> sp. (Pratylenchidae) and <i>Rhabditis</i> sp. (Rhabditidae) [PP] | -                                                                                                                            | Devel. time = female: $9.9 \pm 0.2$ days; male: $8.8 \pm 0.2$ days<br><br>$3.6 \pm 0.3$ , eggs/female/day<br>Reared           | Lab                                                                    | [116]                |
|  |  | <i>Neoscirula</i> sp.                          | <i>Meloidogyne incognita</i> (Kofoed & White) Chitwood (Meloidogynidae) [PP]                                                        | -                                                                                                                            | Colonized Root-knot nematode culture<br><br>Laboratory cultures on nematode prey                                              | Greenhouse: Pot cultures of Root-knot nematode ( <i>M. incognita</i> ) | [117]                |
|  |  |                                                | <i>Tylenchulus semipenetrans</i> Cobb (Tylenchulidae) [PP]                                                                          | -                                                                                                                            | Colonized Citrus nematode culture<br><br>Laboratory cultures on nematode prey                                                 | Greenhouse: Citrus nematode ( <i>T. semipenetrans</i> ) box cultures   | [117]                |
|  |  | <i>Pulaeus pseudominutus</i> (Shiba)           | <i>Rhabditella muscicola</i> Andr ssy (Rhabditidae) [FL]                                                                            | (C) [ <i>Fusarium oxysporum</i> Schltdl. (Hypocreales: Nectriaceae), <i>Pythium spinosum</i> Sawada (Pythiales: Pythiaceae)] | Fecundity: $47.6 \pm 186$ (at 35°C) – $73.2 \pm 1.6$ (at 25°C)<br><br>Fecundity similar to that observed with the other diets | Lab                                                                    | [118]                |
|  |  | <i>Pulaeus</i> sp.                             | Mix of <i>Meloidogyne</i> spp. (Meloidogynidae), <i>Radopholus</i> sp. (Pratylenchidae) and <i>Rhabditis</i> sp. (Rhabditidae) [PP] | -                                                                                                                            | Devel. time = female: $18.0 \pm 1.0$ days; male: $15.3 \pm 0.3$ days<br><br>$2.4 \pm 0.3$ , eggs/female/day<br>Reared         | Lab                                                                    | [116]                |

|  |           |                      |                                                                                                                                                                                                                                                                                   |   |                                                            |     |      |
|--|-----------|----------------------|-----------------------------------------------------------------------------------------------------------------------------------------------------------------------------------------------------------------------------------------------------------------------------------|---|------------------------------------------------------------|-----|------|
|  | Eupodidae | <i>Eupodes</i> sp.   | Mix of <i>Acrobeloides</i> spp. (Cephalobidae), <i>Aphelenchoides</i> sp. (Aphelenchoididae), and <i>Aphelenchus avenae</i> Bastian (Aphelenchidae), <i>Panagrolaimus</i> sp. (Panagrolaimidae) [FL]                                                                              | - | Not frequent. Preference for microphytes (algae and fungi) | Lab | [7]  |
|  |           | <i>Eupodes</i> sp.   | Mix of <i>Panagrolaimus</i> sp. (Panagrolaimidae), <i>Acrobeloides nanus</i> (de Man) Anderson (= <i>Cephalobus nanus</i> ) and <i>Acrobeloides</i> spp. (Cephalobidae), <i>Aphelenchoides</i> sp. (Aphelenchoididae), and <i>Aphelenchus avenae</i> Bastian (Aphelenchidae) [FL] | - | Reared from larva to adult                                 | Lab | [6]  |
|  |           | <i>Eupodes</i> sp.   | Unidentified nematode [possibly FL]                                                                                                                                                                                                                                               | - | -                                                          | Lab | [98] |
|  |           | <i>Linopodes</i> sp. | Mix of <i>Acrobeloides</i> spp. (Cephalobidae), <i>Aphelenchoides</i> sp. (Aphelenchoididae), and <i>Aphelenchus avenae</i> Bastian (Aphelenchidae), <i>Panagrolaimus</i> sp. (Panagrolaimidae) [FL]                                                                              | - | Not frequent. Preference for microphytes (algae and fungi) | Lab | [7]  |

|  |              |                                       |                                                                                                                                                                                                                                                                                   |   |                                                            |     |       |
|--|--------------|---------------------------------------|-----------------------------------------------------------------------------------------------------------------------------------------------------------------------------------------------------------------------------------------------------------------------------------|---|------------------------------------------------------------|-----|-------|
|  | Paratydeidae | <i>Paratydeus</i> sp.                 | Mix of <i>Acrobeloides</i> spp. (Cephalobidae), <i>Aphelenchoides</i> sp. (Aphelenchoididae), and <i>Aphelenchus avenae</i> Bastian (Aphelenchidae), <i>Panagrolaimus</i> sp. (Panagrolaimidae) [FL]                                                                              | - | Not frequent. Preference for microphytes (algae and fungi) | Lab | [7]   |
|  | Stigmaeidae  | <i>Caligohomus durus</i> Fan & Walter | Unidentified nematode [possibly FL]                                                                                                                                                                                                                                               | - | -                                                          | Lab | [324] |
|  | Tydeidae     | Unidentified species                  | Mix of <i>Acrobeloides</i> spp. (Cephalobidae), <i>Aphelenchoides</i> sp. (Aphelenchoididae), and <i>Aphelenchus avenae</i> Bastian (Aphelenchidae), <i>Panagrolaimus</i> sp. (Panagrolaimidae) [FL]                                                                              | - | Preference for microphytes (algae and fungi)               | Lab | [7]   |
|  | Tydeidae     | Unidentified species                  | Mix of <i>Panagrolaimus</i> sp. (Panagrolaimidae), <i>Acrobeloides nanus</i> (de Man) Anderson (= <i>Cephalobus nanus</i> ) and <i>Acrobeloides</i> spp. (Cephalobidae), <i>Aphelenchoides</i> sp. (Aphelenchoididae), and <i>Aphelenchus avenae</i> Bastian (Aphelenchidae) [FL] | - | -                                                          | Lab | [6]   |

- 
- <sup>i</sup> Only obligate parasites were considered plant-parasitic nematodes.
- <sup>ii</sup> Species identified only to genus are considered distinct from each other, unless it is stated in the article that it is the same species as the other publication.
- <sup>iii</sup> Laboratory experiments performed in small arenas such as small petri dishes are indicated only with "Lab". Variations to this experimental unit are explained after a colon (:).
- <sup>iv</sup> Phoretic association between mite adult females and Sciarid adults.
- <sup>v</sup> Not in soil: associated with bark beetle.
- <sup>vi</sup> Not in soil: associated with bark beetle.
- <sup>vii</sup> Not in soil: associated with bark beetle.
- <sup>viii</sup> Not in soil: associated with bark beetle.
- <sup>ix</sup> Not in soil: associated with bark beetle.
- <sup>x</sup> Not in soil: associated with bark beetle.
- <sup>xi</sup> Not in soil: associated with bark beetle.
- <sup>xii</sup> Not in soil: associated with bark beetle.
- <sup>xiii</sup> There was no comparison by experimental design, but information on another prey was included
- <sup>xiv</sup> There was no comparison by experimental design, but information on another prey was included
- <sup>xv</sup> Not in soil: associated with bark beetle.
- <sup>xvi</sup> Not in soil: associated with bark beetle.
- <sup>xvii</sup> Not in soil: associated with bark beetle.
- <sup>xviii</sup> There was no comparison by experimental design, but information on another prey was included
- <sup>xix</sup> Not in soil: associated with bark beetle.
- <sup>xx</sup> Not in soil: associated with bark beetle.
- <sup>xxi</sup> Not in soil: associated with bark beetle.
- <sup>xxii</sup> Intertidal Acari
- <sup>xxiii</sup> Intertidal Acari
- <sup>xxiv</sup> There was no comparison by experimental design, but information on another prey was included
- <sup>xxv</sup> Not in soil: associated with bark beetle.
- <sup>xxvi</sup> There was no comparison by experimental design, but information on another prey was included
- <sup>xxvii</sup> There was no comparison by experimental design, but information on another prey was included
- <sup>xxviii</sup> Not in soil: associated with bark beetle.
- <sup>xxix</sup> Not on soil: leaf cups of *Sarracenia minor* Walter (Magnoliopsida: Sarraceniaceae)
- <sup>xxx</sup> Intertidal Acari
- <sup>xxxi</sup> Not in soil: associated with bark beetle.
- <sup>xxxii</sup> Not in soil: associated with bark beetle.
- <sup>xxxiii</sup> Not in soil: associated with bark beetle.
- <sup>xxxiv</sup> There was no comparison by experimental design, but information on another prey was included
- <sup>xxxv</sup> Not in soil: associated with bark beetles
- <sup>xxxvi</sup> Not in soil: associated with Passalidae beetle.
- <sup>xxxvii</sup> Intertidal Acari
- <sup>xxxviii</sup> Intertidal Acari
